# Supplementary material for: Analysis of Nearly One Thousand Mammalian Mirtrons Reveals Novel Features of Dicer Substrates
Source: PubMed Central journal article supplement (PMC4556696; doi:10.1371/journal.pcbi.1004441), 2015-09-01
Supplement: pcbi.1004441.s002.pdf [file pcbi.1004441.s002.pdf]

Wen and Ladewig  
Supplementary Figure 2

Alignments of mouse/human orthologous mirtrons. Shown are introns that generated small RNA duplexes in both mouse and human (highlighted), with their respective alignments across the available vertebrate genomes. Positions of divergence, with respect to the reference genome at top, are shaded in red. Note that there is not evidence for small RNA generation across most of the aligned species, and only in a small number of the species exhibit a classic "saddle-shaped" evolutionary profile in which the hairpin loop clearly evolves more quickly than does the hairpin arms (e.g. as is seen for *mir-1224*, *mir-3064*, and *mir-877*).

## hsa-mir-1224

|              |                                                                                     |                                |
|--------------|-------------------------------------------------------------------------------------|--------------------------------|
| Human        | GUGAGGACUCGG--GAGGUGGAGGGUGGU--GCCGCCGG--GGCCGGG-CG--CUGUUUCAGCUCGCUU-CUCC          | CCCCA-----CCUCCUCUCUCCUCAG     |
| Chimp        | GUGAGGACUCGG--GAGGUGGAGGGUGGU--GCCGCCGG--GGCCGGG-CG--CUGUUUCAGCUCGCUU-CUCC          | CCCCA-----CCUCCUCUCUCCUCAG     |
| Gorilla      | GUGAGGACUCGG--GAGGUGGAGGGUGGU--GCCGCCGG--GGCCGGG-CG--CUGUUUCAGCUCGCUU-CUCC          | CCCCA-----CCUCCUCUCUCCUCAG     |
| Orangutan    | GUGAGGACUCGG--GAGGUGGAGGGUGG[C]-GCCGCCGG--GGCCGGG-CG--CUGU[C]UCAGCUCGCUU-CUCC       | CCCCA-----CCUCCUCUCUCCUCAG     |
| Rhesus       | GUGAGGACUCGG--GAGGUGGAGGGUGG[C]-GCCGCCGG--GGCCAGG-CG--CUGU[C]UCAGCUCGCUU-CUCC       | CCCCA-----CCUCCUCUCUCCUCAG     |
| Baboon       | GUGAGGACUCGG--GAGGUGGAGGGUGG[C]-GCCGCCGG--GGCCAGG-CG--CUGU[C]UCAGCUCGCUU-CUCC       | CCCCA-----CCUCCUCUCUCCUCAG     |
| Marmoset     | GUGAGGACUCGG--GAGGUGGAGGGUGG[C]-GCCGCCGG--G[C]CGGG-[G]-CUGU[C]UCAGCUCGCUU-CUCC      | CCCCA-----CCUCCUCUCUCCUCAG     |
| Mouse_lemur  | GUGAGGACUCGG--GAGGUGGAGGGUGG[C]-AUCGUCAG--GGCCUGGACG--CUGU[C]UCAGCUCGCUU-CUCC       | CCCCA-----CCUCCUCUCUCCUCAG     |
| TreeShrew    | GUGAGGACUCGG--GAGGUGGAGGG[C]GGG--GUCGCCAG--GGCCGGG-CG--C[C]GUCUCAGC[C]CGC-[U]-CUC   | CCCCA-----CCUCCUCUCUCCUCAG     |
| Mouse        | GUGAGGACUCGG--GAGGUGGAGGGUAGG--AUCAUUAG--AGCCAGAGCU--CUGU[C]UCAGCUC[C]U--CUCC       | CCCCA-----CCU[C]UCUCUCCUCAG    |
| Rat          | GUGAGGACUCGG--GAGGUGGAGGGUAGU--ACC[A]UUA--AGCCAGAGCU--CUGU[C]UCAGCUC[C]U--CUCC      | CCCCA-----CCUCUUCUCUCCUCAG     |
| Kangaroo_rat | GUGAGGACUCGG--GAGGUGGAGGGUGG[C]-GUGGCCAG--GCCAGGSUG--C[A]U[C]UCAGCUCGCUU-CUCC       | CCCCA-----CCUCCUCUCUCCUCAG     |
| Guinea_Pig   | GUGAGGACUCGG--GAGGUGGAGGGAGGSCGGUCGCC-[G]-GGCCUGGSCUGGCGUGUCCAGUUUGGCU--G           | UCCCCCCA-----CCUCCUCUCUCCUCAG  |
| Squirrel     | GUGAGGACUCGG--GAGGUGGAGGGUAGU--GUCACCAG--AGCUAGAGUG--AUGU[C]UCAGCUC[C]U--CUCC       | CCCCA-----CCUCCUCUCUCCUCAG     |
| Rabbit       | GUGAGGACUCGG--GAGGUGGAGGG[C]GGG--GUCGCCAG--GGCCAGAGCG--CUGU[C]UCAGCUCGCUU-CUCC      | CCCCA-----CCUCCUCUCUCCUCAG     |
| Pika         | GUGAGGACUCGG--GAGGUGGAGGGU[AUC]-AUUGCCAG--AGCCGGG[AUG]-CUGU[C]UCAGCUCGCUU-CUCC      | CCCCA-----CCUCCUCUCUCCUCAG     |
| Alpaca       | GUGAGGACUCGG--GAGGUGGAGGGUGG[C]-GUGGCCAG--GGCCAGGSCA--CUGU[C]UCAGCUCG[C]U--CUCC     | CCCCA-----CCUCCUCUCUCCUCAG     |
| Dolphin      | GUGAGGACUCGG--GAGGUGGAGGGUGG[C]-AUCGCCAG--GGCCAGGSCG--CUGU[C]UCAGCUCG[C]U--CUCC     | CCCCA-----CCUCCUCUCUCCUCAG     |
| Cow          | GUGAGGACUCGG--GAGGUGGAGGGUGG[C]-GUGGCCAG--GGCCAGGSCA--CUGU[C]UCAGCUCGCUU-CUCC       | CCCCA-----CCUCCUCUCUCCUCAG     |
| Horse        | GUGAGGACUCGG--GAGGUGGAGGGUGG[C]-AUCGCCAG--GGCCAGGSCG--CUGU[C]UCAGCUCGCUU-CUCC       | CCCCA-----CCUCCUCUCUCCUCAG     |
| Cat          | GUGAGGACUCGG--GAGGUGGAGGGUGGU--GUGGCCAG--GGCCAGGSCA--CUGU[C]UCAGCUC[C]U--CUCC       | CCCCA-----CCUCCUCUCUCCUCAG     |
| Dog          | GUGAGGACUCGG--GAGGUGGAGGGUGG[C]-GCCGCCAA--GGCCAGGSCA--CUGU[C]UCAGCUCGCUU-CUCC       | CCCCA-----CCUCCUCUCUCCUCAG     |
| Microbat     | GUGAGGACUCGG--GAGGUGGAGGGUGGU--GUGGCCAG--GGCCAGGSCA--CUGU[C]UCAGCUC[C]U--CUCC       | CCCCA-----CCUCCUCUCUCCUCAG     |
| Megabat      | GUGAGGACUCGG--GAGGUGGAGGGUGGU--G[U]U-----GCCAGGCG--UUGU[C]UCAGCUC[C]U--CUCC         | CCCCA-----CCUCCUCUCUCCUCAG     |
| Hedgehog     | GUGAGGACUCGG--GAGGUGGAGGGUGG[C]-GUGGCCAG--GCCCGGCG--CUGU[C]UCAGCUCG[C]U--CUCC       | CCCCA-----CCUCCUCUCUCCUCAG     |
| Elephant     | GUGAGGACUCGG--GAGGUGGAGGGUGG[C]-GUCGCCAA--GGCCAGGSCG--CUGU[C]UCAGCUCG[C]U--CUCC     | CCCCA-----CCUCCUCUCUCCUCAG     |
| Rock_hyrax   | GUGAGGACUCGG--GAGGUGGAGGGUGGU--GUCACCAG--GGCCAGGSCA--CUGU[C]UCAGCUCG[C]U--CUCC      | CCCCA-----CCUCCUCUCUCCUCAG     |
| Tenrec       | GUGAGGACUCGG--GAGGUGGAGGG[C]GGG--GUGGCCGG[C]CCGGC--GGGCG--CUGU[C]UCAGCUCG[C]U--CUCC | CCCCA-----CCUCCUCUCUCCUCAG     |
| Armadillo    | GUGAGGACUCGG--GAGGUGGAGGGUGG[C]-CUCUUGAG--GGCCGGGCG--UUGU[C]UCAGCUCGCUU-CUCC        | CCCCA-----CCUCCUCUCUCCUCAG     |
| Sloth        | GUGAGGACUCGG--GAGGUGGAGGGUGGA--CUUGUCAG--GGCCGGGCG--CUGU[C]UCAGCUCGCUU--CUCC        | CCCCA-----CCUCCUCUCUCCUCAG     |
| Wallaby      | GUGAGGGUAAGACAGGAUGGAAGGA--UUUGCCAG--GGSUGGGSCA--GAG[C]CU--GGCUCGCU--CUC            | ACCUGAGCCUGCCUGC[C]C[C]CUCACAG |

**hsa-mir-1229**

|              |             |         |         |      |             |         |        |           |    |     |     |
|--------------|-------------|---------|---------|------|-------------|---------|--------|-----------|----|-----|-----|
| Human        | 5UGGGUAGGGU | UUGGGGG | A-GAGCC | UGGG | -CUGGGUUCAG | GGACACC | CUCUCA | CCACUGCCC | UC | CCA | CAG |
| Chimp        | 5UGGGUAGGGU | UUGGGGG | A-GAGCC | UGGG | -CUGGGUUC   | GGACACC | CUCUCA | CCUGCCC   | UC | CC  | CAG |
| Gorilla      | 5UGGGUAGGGU | UUGGGGG | A-GAGCC | UGGG | -CUGGGUUC   | GGACACC | CUCUCA | CCUGCCC   | UC | CC  | CAG |
| Orangutan    | 5UGGGUAGGGU | UUGGGGG | A-GAGCC | UGGG | -CUGGGUUC   | GGACACC | CUCUCA | CCUGCCC   | UC | CC  | CAG |
| Rhesus       | 5UGGGUAGGC  | UUGGGGG | A-GAGCC | UGGG | -CUGGGUUC   | GGACACC | CUCUCA | CCUGCCC   | UC | CC  | CAG |
| Marmoset     | 5UGGGUAGGC  | UUGGGGG | A-GAGCC | UGGG | -CUGGGUUC   | GGACACC | CUCUCA | CCUGCCC   | UC | CC  | CAG |
| Mouse_lemur  | 5UGCAUUGCA  | UUGGGGG | A-GAGCC | UGGG | -CUGGGUUC   | GGACACC | CUCUCA | CCUGCCC   | UC | CC  | CAG |
| Bushbaby     | 5UGCAUUGGC  | UUGGGGG | A-GAGCC | UGGG | -CUGGGUUC   | GGACACC | CUCUCA | CCUGCCC   | UC | CC  | CAG |
| Mouse        | 5UGCAUUGGC  | UUGGGGG | A-GAGCC | UGGG | -CUGGGUUC   | GGACACC | CUCUCA | CCUGCCC   | UC | CC  | CAG |
| Rat          | 5UGCAUUGGC  | UUGGGGG | A-GAGCC | UGGG | -CUGGGUUC   | GGACACC | CUCUCA | CCUGCCC   | UC | CC  | CAG |
| Kangaroo_rat | 5UGCAUUGGC  | UUGGGGG | A-GAGCC | UGGG | -CUGGGUUC   | GGACACC | CUCUCA | CCUGCCC   | UC | CC  | CAG |
| Guinea_Pig   | 5UGCAUUGGC  | UUGGGGG | A-GAGCC | UGGG | -CUGGGUUC   | GGACACC | CUCUCA | CCUGCCC   | UC | CC  | CAG |
| Rabbit       | 5UGCAUUGGC  | UUGGGGG | A-GAGCC | UGGG | -CUGGGUUC   | GGACACC | CUCUCA | CCUGCCC   | UC | CC  | CAG |
| Alpaca       | 5UGCAUUGGC  | UUGGGGG | A-GAGCC | UGGG | -CUGGGUUC   | GGACACC | CUCUCA | CCUGCCC   | UC | CC  | CAG |
| Dolphin      | 5UGCAUUGGC  | UUGGGGG | A-GAGCC | UGGG | -CUGGGUUC   | GGACACC | CUCUCA | CCUGCCC   | UC | CC  | CAG |
| Cow          | 5UGCAUUGGC  | UUGGGGG | A-GAGCC | UGGG | -CUGGGUUC   | GGACACC | CUCUCA | CCUGCCC   | UC | CC  | CAG |
| Horse        | 5UGCAUUGGC  | UUGGGGG | A-GAGCC | UGGG | -CUGGGUUC   | GGACACC | CUCUCA | CCUGCCC   | UC | CC  | CAG |
| Cat          | 5UGCAUUGGC  | UUGGGGG | A-GAGCC | UGGG | -CUGGGUUC   | GGACACC | CUCUCA | CCUGCCC   | UC | CC  | CAG |
| Dog          | 5UGCAUUGGC  | UUGGGGG | A-GAGCC | UGGG | -CUGGGUUC   | GGACACC | CUCUCA | CCUGCCC   | UC | CC  | CAG |
| Microbat     | 5UGCAUUGGC  | UUGGGGG | A-GAGCC | UGGG | -CUGGGUUC   | GGACACC | CUCUCA | CCUGCCC   | UC | CC  | CAG |
| Megabat      | 5UGCAUUGGC  | UUGGGGG | A-GAGCC | UGGG | -CUGGGUUC   | GGACACC | CUCUCA | CCUGCCC   | UC | CC  | CAG |
| Shrew        | 5UGCAUUGGC  | UUGGGGG | A-GAGCC | UGGG | -CUGGGUUC   | GGACACC | CUCUCA | CCUGCCC   | UC | CC  | CAG |
| Rock_hyrax   | 5UGCAUUGGC  | UUGGGGG | A-GAGCC | UGGG | -CUGGGUUC   | GGACACC | CUCUCA | CCUGCCC   | UC | CC  | CAG |
| Opossum      | 5UGCAUUGGC  | UUGGGGG | A-GAGCC | UGGG | -CUGGGUUC   | GGACACC | CUCUCA | CCUGCCC   | UC | CC  | CAG |

### hsa-mir-3064

|              |                                                                               |
|--------------|-------------------------------------------------------------------------------|
| Human        | UCUGGCUGU--UGUGGUG---UGCANAACUCCG---UACAUUGCUAUUUUGCCACACUGC--AACAC---CUUACAG |
| Chimp        | UCUGGCUGU--UGUGGUG---UGCANAACUCCG---UACAUUGCUAUUUUGCCACACUGC--AACAC---CUUACAG |
| Gorilla      | UCUGGCUGU--UGUGGUG---UGCANAACUCCG---UACAUUGCUAUUUUGCCACACUGC--AACAC---CUUACAG |
| Orangutan    | UCUGGCUGU--UGUGGUG---UGCANAACUCCG---UACAUUGCUAUUUUGCCACACUGC--AACAC---CUUACAG |
| Rhesus       | UCUGGCUGU--UGUGGUG---UGCANAACUCCG---UACAUUGCUAUUUUGCCACACUGC--AACAC---CUUACAG |
| Baboon       | UCUGGCUGU--UGUGGUG---UGCANAACUCCG---UACAUUGCUAUUUUGCCACACUGC--AACAC---CUUACAG |
| Marmoset     | UCUGGCUGU--UGUGGUG---UGCANAACUCCG---UACAUUGCUAUUUUGCCACACUGC--AACAC---CUUACAG |
| Tarsier      | UCUGGCUGU--UGUGGUG---UGCANAACUCCG---UACAUUGCUAUUUUGCCACACUGC--AACAC---CUUACAG |
| Mouse_lemur  | UCUGGCUGU--UGUGGUG---UGCANAACUCCG---UACAUUGCUAUUUUGCCACACUGC--AACAC---CUUACAG |
| Bushbaby     | UCUGGCUGU--UGUGGUG---UGCANAACUCCG---UACAUUGCUAUUUUGCCACACUGC--AACAC---CUUACAG |
| TreeShrew    | UCUGGCUGU--UGUGGUG---UGCANAACUCCG---UACAUUGCUAUUUUGCCACACUGC--AACAC---CUUACAG |
| Mouse        | UCUGGCUGU--UGUGGUG---UGCANAACUCCG---UACAUUGCUAUUUUGCCACACUGC--AACAC---CUUACAG |
| Rat          | UCUGGCUGU--UGUGGUG---UGCANAACUCCG---UACAUUGCUAUUUUGCCACACUGC--AACAC---CUUACAG |
| Kangaroo_rat | UCUGGCUGU--UGUGGUG---UGCANAACUCUG---UACAUUGCUAUUUUGCCACACUGC--AACAC---CUUACAG |
| Guinea_Pig   | UCUGGCUGU--UGUGGUG---UGCANAACUCUG---UACAUUGCUAUUUUGCCACACUGC--AACAC---CUUACAG |
| Rabbit       | UCUGGCUGU--UGUGGUG---UGCANAACUCUG---UACAUUGCUAUUUUGCCACACUGC--AACAC---CUUACAG |
| Pika         | UCUGGCUGU--UGUGGUG---UGCANAACUCCG---UACAUUGCUAUUUUGCCACACUGC--AACAC---CUUACAG |
| Alpaca       | UCUGGCUGU--UGUGGUG---UGCANAACUCCG---UACAUUGCUAUUUUGCCACACUGC--AACAC---CUUACAG |
| Dolphin      | UCUGGCUGU--UGUGGUG---UGCANAACUCCG---UACAUUGCUAUUUUGCCACACUGC--AACAC---CUUACAG |
| Cow          | UCUGGCUGU--UGUGGUG---UGCANAACUCUG---UACAUUGCUAUUUUGCCACACUGC--AACAC---CUUACAG |
| Horse        | UCUGGCUGU--UGUGGUG---UGCANAACUCCG---UACAUUGCUAUUUUGCCACACUGC--AACAC---CUUACAG |
| Cat          | UCUGGCUGU--UGUGGUG---UGCANAACUCCG---UACAUUGCUAUUUUGCCACACUGC--AACAC---CUUACAG |
| Dog          | UCUGGCUGU--UGUGGUG---UGCANAACUCCG---UACAUUGCUAUUUUGCCACACUGC--AACAC---CUUACAG |
| Microbat     | UCUGGCUGU--UGUGGUG---UGCANAACUCCG---UACAUUGCUAUUUUGCCACACUGC--AACAC---CUUACAG |
| Megabat      | UCUGGCUGU--UGUGGUG---UGCANAACUCCG---UACAUUGCUAUUUUGCCACACUGC--AACAC---CUUACAG |
| Hedgehog     | UCUGGCUGU--UGUGGUG---UGCANAACUCUG---UACAUUGCUAUUUUGCCACACUGC--AACAC---CUUACAG |
| Shrew        | UCUGGCUGU--UGUGGUG---UGCANAACUCCG---UACAUUGCUAUUUUGCCACACUGC--AACAC---CUUACAG |
| Elephant     | UCUGGCUGU--UGUGGUG---UGCANAACUCUG---UACAUUGCUAUUUUGCCACACUGC--AACAC---CUUACAG |
| Rock_hyrax   | UCUGGCUGU--UGUGGUG---UGCANAACUCUG---UACAUUGCUAUUUUGCCACACUGC--AACAC---CUUACAG |
| Tenrec       | UCUGGCUGU--UGUGGUG---UGCANAACUCCG---UACAUUGCUAUUUUGCCACACUGC--AACAC---CUUACAG |
| Armadillo    | UCUGGCUGU--UGUGGUG---UGCANAACUCCG---UACAUUGCUAUUUUGCCACACUGC--AACAC---CUUACAG |
| Sloth        | UCUGGCUGU--UGUGGUG---UGCANAACUCCG---UACAUUGCUAUUUUGCCACACUGC--AACAC---CUUACAG |
| Opossum      | UCUGGCUGU--UGUGGUG---UGCANAACUCUG---UACAUUGCUAUUUUGCCACACUGC--AACAC---CUUACAG |
| Platypus     | UCUGGCUGU--UGUGGUG---UGCANAACUCUG---UACAUUGCUAUUUUGCCACACUGC--AACAC---CUUACAG |
| Chicken      | UCUGGCUGU--UGUGGUG---UGCANAACUCUG---UACAUUGCUAUUUUGCCACACUGC--AACAC---CUUACAG |
| Zebra_finch  | UCUGGCUGU--UGUGGUG---UGCANAACUCUG---UACAUUGCUAUUUUGCCACACUGC--AACAC---CUUACAG |
| Lizard       | UCUGGCUGU--UGUGGUG---UGCANAACUCUG---UACAUUGCUAUUUUGCCACACUGC--AACAC---CUUACAG |
| X_tropicalis | UCUGGCUGU--UGUGGUG---UGCANAACUCUG---UACAUUGCUAUUUUGCCACACUGC--AACAC---CUUACAG |
| Tetraodon    | UCUGGCUGU--UGUGGUG---UGCANAACUCUG---UACAUUGCUAUUUUGCCACACUGC--AACAC---CUUACAG |
| Fugu         | UCUGGCUGU--UGUGGUG---UGCANAACUCUG---UACAUUGCUAUUUUGCCACACUGC--AACAC---CUUACAG |
| Stickleback  | UCUGGCUGU--UGUGGUG---UGCANAACUCUG---UACAUUGCUAUUUUGCCACACUGC--AACAC---CUUACAG |
| Medaka       | UCUGGCUGU--UGUGGUG---UGCANAACUCUG---UACAUUGCUAUUUUGCCACACUGC--AACAC---CUUACAG |
| Zebrafish    | UCUGGCUGU--UGUGGUG---UGCANAACUCUG---UACAUUGCUAUUUUGCCACACUGC--AACAC---CUUACAG |
| Lamprey      | UCUGGCUGU--UGUGGUG---UGCANAACUCUG---UACAUUGCUAUUUUGCCACACUGC--AACAC---CUUACAG |

## hsa-mir-6745

|              |          |        |        |                  |                  |                |                   |              |                 |              |          |       |       |
|--------------|----------|--------|--------|------------------|------------------|----------------|-------------------|--------------|-----------------|--------------|----------|-------|-------|
| Human        | UGGGUGGA | ----   | AGAAGG | -----            | UCU--GGUU        | -----          | CUCA--C-CA--GGCC  | ----         | C-C-UCCUCUCC    | -C-----      | A-----   | CCCAG |       |
| Chimp        | UGGGUGGA | ----   | AGAAGG | -----            | UCU--GGUU        | -----          | CUCA--C-CA--GGUC  | ----         | C-C-UCCUCUCC    | -C-----      | A-----   | CCCAG |       |
| Gorilla      | UGGGUGGA | ----   | AGAAGG | -----            | UCU--GGUU        | -----          | CUCA--C-CA--GGCC  | ----         | C-C-UCCUCUCC    | -C-----      | A-----   | CCCAG |       |
| Orangutan    | UGGGUGGA | ----   | AGAAGG | -----            | UCU--AGUU        | -----          | CUCA--C-CA--GACC  | ----         | C-C-UCCUCUCC    | -C-----      | A-----   | CCCAG |       |
| Rhesus       | UGGGUGGA | ----   | AGAAGG | -----            | UCU--GGUC        | -----          | CUCA--C-CA--GACC  | ----         | C-C-UCCUCUCC    | -C-----      | A-----   | CCCAG |       |
| Baboon       | UGGGUGGA | ----   | AGAAGG | -----            | UCU--GGUC        | -----          | CUCA--C-CA--GACC  | ----         | C-C-UCCUCUCC    | -C-----      | A-----   | CCCAG |       |
| Marmoset     | AGAAUGGA | ----   | AGAAGG | -----            | UCU--GGUC        | -----          | CUCA--C-CA--GGCC  | ----         | C-C-UCCUCUCC    | -C-----      | A-----   | CCCAG |       |
| Mouse_lemur  | UGCAUGGA | ----   | UAAGG  | -----            | UCU--UGUC        | -----          | CUCA--C-CA--GACC  | ----         | C-CAUCCCUCC     | -C-----      | A-----   | UCUAG |       |
| Bushbaby     | UACGUAGA | ----   | UGAAGC | -----            | UCU--CCUC        | -----          | CUCA--U-UU--GACC  | ----         | C-UUCCCUCC      | -C-----      | A-----   | CCCAG |       |
| TreeShrew    | UGAGUGGC | ----   | GGAAGG | -----            | UCU--GGUC        | -----          | CUCA--C-CA--GACC  | ----         | U-C-UCCUCUCC    | -U-----      | C-----   | UCUAG |       |
| Mouse        | UGAGUGGA | ----   | AGGAG  | -----            | U-C--UGUC        | -----          | CUCA--C-UG--CCUC  | ----         | C-C-UUCUCUCU    | -C-----      | A-----   | CCCAG |       |
| Rat          | UAGUGGA  | ----   | AGGAG  | -----            | U-C--UGUC        | -----          | CUCA--C-UG--CCUC  | ----         | C-C-UUCUCUCU    | -C-----      | A-----   | CCCAG |       |
| Guinea_Pig   | UA-----  | ----   | -----  | -----            | -C--AGUC         | -----          | CUA--A-C-UG--GCC  | ----         | C-U-UCCUCUCC    | -U-----      | A-----   | CCUAG |       |
| Squirrel     | UGAGUGGA | ----   | GAGUGG | -----            | UCC--CAUC        | -----          | CUCA--C--JGGCACCU | ----         | C-C-UUCUCUCC    | -U-----      | A-----   | CCCAG |       |
| Rabbit       | UGGGUGGA | ----   | AGAAGG | -----            | CCU--GGUC        | -----          | CUCA--C-CUC--GCC  | ----         | C-U-UUCUCC      | -C-----      | C-----   | UCAG  |       |
| Pika         | CAGGUGGA | ----   | AGA    | GGGUGACAGUGGCGCC | CU--GGUC         | -----          | CUCA--C-CUC--CUC  | ----         | A-C-AAUUUCU--GU | -----        | U-----   | UCAG  |       |
| Dolphin      | -----    | ----   | A      | AAGG-----        | UCU--UAUC        | -----          | CUCA--C-CA--GACC  | ----         | C-C-UCCUCUCC    | -C-----      | A-----   | CCCAG |       |
| Cow          | UGAGUGGA | AGAAGA | AGAAGG | -----            | UCU--UGUC        | -----          | CUCA--C-CA--GACC  | ----         | C-C-UCCUCUCC    | -C-----      | A-----   | CCCAG |       |
| Horse        | UGAGUGGA | ----   | AGAAGG | -----            | UCU--UGUC        | -----          | CUCA--C-CA--GGCC  | ----         | C-C-UCCUCUCC    | -C-----      | A-----   | CCCAG |       |
| Cat          | UGAGUGGA | ----   | AGAAGG | -----            | UCU--UGUC        | -----          | CUCA--C-CG--GGCC  | ----         | C-C-UCCUGUCC    | -C-----      | A-----   | CCCAG |       |
| Dog          | UGAGUGGA | ----   | AGA    | CGG-----         | UCU--UGUC        | -----          | CUCA--C-CA--GGCC  | ----         | C-C-UCCUCUCC    | -C-----      | A-----   | CCCAG |       |
| Microbat     | UGAGUGGA | ----   | AGGAGG | -----            | UCU--CGUG        | -----          | CUA--A-C-CA--GGUC | ----         | C-C-UCCUCUCC    | -C-----      | A-----   | CCCAG |       |
| Megabat      | UGAGUGGA | ----   | AGAAGG | -----            | UCUUAUCAUC       | -----          | CUCA--C-CA--GGCC  | ----         | C-C-UCCUCUCC    | -C-----      | A-----   | CCCAG |       |
| Hedgehog     | UGAGUG-- | ----   | GGAAGG | -----            | UCU--AGCG        | -----          | CUCA--C-CA--GGGC  | ----         | C-U-C-AUCUCUCC  | -C-----      | C-----   | UCUAG |       |
| Elephant     | UGGGUGGA | ----   | AGAAGG | -----            | CCU--CAUC        | -----          | CUCA--C-CA--GGC   | ----         | C-C-UCCUCUCC    | -C-----      | A-----   | CCCAG |       |
| Rock_hyrax   | UGGAUGAA | ----   | UGAAGG | -----            | UCU--CAUC        | -----          | CUCA--C-CA--GGC   | ----         | C-U-UCCUCUCC    | -C-----      | A-----   | CCCAG |       |
| Tenrec       | GGGUGGU  | ----   | AGGAGG | -----            | CUU--C--         | -----          | CUCA--C-CA--GGCC  | ----         | C-U-UCCUCUCC    | -C-----      | A-----   | CCCAG |       |
| Opossum      | CGAGGGGA | ----   | GGUGGG | -----            | CCC--CAGCACGGCCG | CUA--C-CG--GUC | ----              | C-C-UCCUGUCC | -U-----         | -----        | -----    | CCCAG |       |
| Wallaby      | -----    | ----   | --CUG  | -----            | ACC--UGCU        | -----          | CCG--U-UA--CAC    | ----         | U-C-UCUCUCU     | -CUGGCUGC    | -----    | CCCAG |       |
| Platypus     | GGGAUGGA | ----   | GCGAGG | -----            | GCG--AGAG        | -----          | CCG--A-CG--GGCC   | GGCGUU       | C-UCCUCUCC      | -C-----      | GGGCGCUG | CCCAG |       |
| X_tropicalis | UGUCUCA  | ----   | UGGAG  | AUGGU            | -----            | U-----         | CUCA              | GGC-UG--GUGU | ----            | C-U-UCCUCUCC | CCAU-    | ----- | CCCAG |

hsa-mir-6751

|              |                                                                                                                                                                                 |
|--------------|---------------------------------------------------------------------------------------------------------------------------------------------------------------------------------|
| Human        | UUGG-GGGUG-AGG---U-----UGGUG-UCUG-----GCCCCAG--CAGCCCAGACUGAGCCU-----CU---CUCUCUCC---AG                                                                                         |
| Chimp        | UUGG-GGGUG-AGG---U-----UGGUG-UCUG-----GCCCCAG--CAGCCCAGACUGAGCCU-----CU---CUCUCUCC---AG                                                                                         |
| Gorilla      | UUGG-GGGUG-AGG---U-----UGGUG-UCUG-----GCCCCAG--CAGCCCAGACUGAGCCU-----CU---CUCUCUCC---AG                                                                                         |
| Orangutan    | GG-GGGUG-AGG---U-----UGGUG-UCUG-----GCCCCAG--CAGCCCAGACUGAGCCU-----CU---CUCUCUCC---AG                                                                                           |
| Rhesus       | UUGG-GGGUG-AGG---U-----UGGUG-UCUG-----GCCCCAG--CAGCCCAGACUGAGCCU <u>UUCU</u> -----CU---CUCUCUCC---AG                                                                            |
| Baboon       | UUGG-GGGUG-AGG---U-----UGGUG-UCUG-----GCCCCAG--CAGCCCAGACUGAGCCU-----CU---CUCUCUCC---AG                                                                                         |
| Marmoset     | UUGG-GGGUG-AGG---U-----UGGUG-UCUG-----GCCCCAG <u>CAG</u> -CAGCCCAGACUGAGCCU <u>CUCUCUCUCUCUCUCUCUCUCUCUCUCUCUCUCUCUCUCUCU</u> CU---CUCUCUCC---AG                                |
| Mouse_lemur  | UGCA-GGUG-GGG-U-----GGU-UCAG-----GCCCAG-- <u>A</u> AGCCCAGACUGAGCCU-----CU- <u>A</u> -CUCUCUCC---AG                                                                             |
| Bushbaby     | UGCA-GGUG-GGG-U-----GGU-UCAG-----GCCCAG-- <u>CAGG</u> -CAGC-CAGACUGAGCCU-----CU- <u>A</u> - <u>CUU</u> UCUCC---AG                                                               |
| TreeShrew    | UGCA-GGUG-GGG-U-----GGU-UCAG-----GCCCAG--CAGC-CAGACUGAGCCU-----CU- <u>A</u> -CUCUCUCC---AG                                                                                      |
| Mouse        | UCU-GGGUG-GAG-A-----GGU--AG-----GCCCAG-- <u>AGC</u> CAG-CUGAGCCU----- <u>UG</u> - <u>UAU</u> CUC <u>UG</u> CC---AG                                                              |
| Rat          | UUCA-GGUU- <u>AAG</u> -A-----GGUG-- <u>AG</u> -----GCCCAG-- <u>AGC</u> CAGACUGAGCCU----- <u>UG</u> - <u>UGU</u> CUC <u>UG</u> CC---AG                                           |
| Kangaroo_rat | UUGG-GGGU- <u>AACA</u> UCA-----GGUG-- <u>AA</u> -----GCCCAG--CAGCCCAGACU <u>AAG</u> U----- <u>UC</u> - <u>CAG</u> CUUCUCC---AG                                                  |
| Guinea_Pig   | UAGA-GGGC-GAC-A-----GGCA-- <u>G</u> <u>CAGGGGUGCCUGAU</u> G <u>CC</u> ----- <u>A</u> AGCCC <u>AA</u> CU <u>A</u> AG <u>UG</u> ----- <u>CC</u> - <u>G</u> - <u>CUAGC</u> CC---AG |
| Squirrel     | UAGA-GGGC-GAC-A-----GGCA-- <u>G</u> <u>CAGGGGUGCCUGAU</u> G <u>CC</u> ----- <u>A</u> AGCCC <u>AA</u> CU <u>A</u> AG <u>UG</u> ----- <u>CC</u> - <u>A</u> - <u>CUAGC</u> CC---AG |
| Rabbit       | UAGG-GGGU- <u>GG</u> -S-----GUGG-- <u>GG</u> -----GCCCAG-- <u>CAGC</u> - <u>AAAC</u> G <u>CC</u> ----- <u>UG</u> - <u>U</u> - <u>CUUCU</u> CC---AG                              |
| Pika         | UGCA-GGGU- <u>GA</u> -G-----GUGA-- <u>G</u> -----GCCCAG--CAGCCCAGACU <u>AA</u> CU----- <u>UG</u> - <u>A</u> - <u>CUC</u> CU <u>C</u> ---AG                                      |
| Dolphin      | UUGG-AGGUG- <u>UG</u> -G-----GGUG-UCAG-----GCCCAG--CAGCCCAGACUGAGCCU-----CU- <u>G</u> -CUCUCUCC---AG                                                                            |
| Cow          | UGGG-AGGUG- <u>UG</u> -G-----GGUG-UCAG-----GCCCAG-- <u>C</u> <u>AGGG</u> UGAGCCU-----CU- <u>G</u> -CUCUCUCC <u>UU</u> AG                                                        |
| Horse        | UAGA-GGGC-GAC-A-----GGUG-UCAG-----GCCCAG-- <u>CAG</u> <u>CCAG</u> CUGAGCCU----- <u>U</u> - <u>U</u> -CUCUCUCC---AG                                                              |
| Cat          | UGCA-GGGU- <u>UG</u> -G-----GGCA-- <u>UC</u> AG-----GCCCAG-- <u>CGCC</u> CAGCUGAGCCU-----CU- <u>UG</u> - <u>CCU</u> CUCUCC---AG                                                 |
| Dog          | UGCA-GGGU- <u>UG</u> -G-----GGUG-UCAG-----GCCCAG-- <u>CG</u> <u>CC</u> UGAGCCU-----CU- <u>G</u> -CUCUCUCC---AG                                                                  |
| Megabat      | UGCA-AGCA- <u>GG</u> -G-----GUU-UCAG-----GCCCAG--CAGCCCAGACUGAGCCU-----CU- <u>A</u> -CUCUCUCC---AG                                                                              |
| Hedgehog     | UGGG-GCCC-AGG-----G--UGGG-----GCG-- <u>AG</u> <u>CCC</u> UGUAGGCCU-----CU- <u>G</u> -CUCUCUCC---AG                                                                              |
| Shrew        | UGGG-AGCA- <u>GG</u> -G-----C--UCGG-----GCCCAG-- <u>AG</u> <u>CCC</u> CAGCUGAGCCU----- <u>CC</u> - <u>G</u> -CUCUCUCC---AG                                                      |
| Elephant     | UGCA-GGGC-AGG-----GUGG-SCCA-----GCCCAG-- <u>CAGC</u> - <u>CAG</u> UGAGCCU-----CU- <u>G</u> -CUCUCUCC---AG                                                                       |
| Opossum      | UUUU-GGGU- <u>GG</u> -SAGCCUUUGGUUCCCUUGGGG-CCCA-----GCCAG-- <u>AA</u> <u>UUU</u> SC <u>AA</u> U <u>UG</u> -----CU- <u>UUG</u> CUCUC---AG                                       |
| Wallaby      | UGACUUGGCA- <u>CA</u> -S-----GAGG-CUU-----GCCCAG-- <u>CAG</u> <u>UUU</u> SC <u>AA</u> U <u>UG</u> -----CU- <u>U</u> -CUCUCUCC---AG                                              |
| X_tropicalis | UACA-GGGU- <u>CA</u> -C-----UGU-UCUU-----C- <u>UA</u> CA--CA <u>UUUG</u> AC <u>UU</u> A <u>UU</u> ----- <u>U</u> - <u>C</u> - <u>CUACA</u> C---AG                               |

## [hsa-mir-6767](#)

|             |                                                                                                                                                                                |
|-------------|--------------------------------------------------------------------------------------------------------------------------------------------------------------------------------|
| Human       | U <b>CGCAGACAGGGAC</b> ----- <b>ACAUGGAGA</b> ACGCCCCACCAGUCCCA--CGUGCUUC--UCUUCCGCAG                                                                                          |
| Chimp       | U <b>GCAGACAGGGAC</b> ----- <b>ACAUGGAGA</b> ACGCCCCACCAGUCCCA--CGUGCUUC--UCUUCCGCAG                                                                                           |
| Orangutan   | U <b>GCAGACAGGGAC</b> ----- <b>ACAUGGAGA</b> ACGCCCCACCAGUCCCA--CGUGCUUC--UCUUCCGCAG                                                                                           |
| Rhesus      | U <b>GCAGACAGGGAC</b> ----- <b>GCAUGGAGA</b> AUGCC <b>UGC</b> CCUAGUCCCA--CGUGCUUC--UCUUCCGCAG                                                                                 |
| Baboon      | U <b>GCAGACAGGGAC</b> ----- <b>GCAUGGAGA</b> AUGCC <b>UGC</b> CCUAGUCCCA--CGUGCUUC--UCUUCCGCAG                                                                                 |
| Marmoset    | U <b>GCAGCAGGGAC</b> ----- <b>A</b> ----- <b>CCUGC</b> CCUAGUUC--CA--CGUGCUUC--UCUUCCGCAG                                                                                      |
| Tarsier     | U <b>GGAGACAGGGAC</b> ----- <b>ACUUUGAGA</b> AC <b>CAUG</b> CCCUUGUU <b>CA</b> GGG <b>GUGGU</b> GC--UCUUCCGCAG                                                                 |
| Mouse_lemur | <b>CUGGAGAC</b> --GGGC----- <b>CCUGGAG</b> C <b>AG</b> GGG <b>UGCC</b> U <b>UG</b> GU <b>UCA</b> --GG <b>CAGCA</b> C--UCUUCCGCAG                                               |
| Mouse       | <b>GGGC</b> --AGCU <b>UGAU</b> ----- <b>GCU</b> ----- <b>UGUC</b> CUAGUU <b>UCA</b> --CG <b>UGG</b> CCU <b>CUUUU</b> UGCAG                                                     |
| Squirrel    | <b>---</b> GUUGGGAC----- <b>AUGCA</b> GGG <b>AGC</b> --UUGUC <b>U</b> AGUU <b>UCA</b> -- <b>AG</b> GG <b>UGG</b> CU <b>UCU</b> UCC <b>C</b> AG                                 |
| Rabbit      | <b>GGAU</b> -- <b>GGU</b> GG <b>AGC</b> ----- <b>GCU</b> --UG <b>UAG</b> CG <b>CGUG</b> CC <b>GGCC</b> ----- <b>---</b> -- <b>---</b> CU <b>---</b> UCUG <b>CC</b> C <b>AG</b> |
| Dolphin     | <b>UGGGAGACG</b> --GGAC----- <b>AC</b> -- <b>UCAUGA</b> AG <b>GC</b> <b>UUGGC</b> U <b>UGUU</b> <b>UCA</b> -- <b>GG</b> GAUG <b>G</b> C--UCUU <b>CC</b> C <b>AG</b>            |
| Cow         | <b>UGGGAGACA</b> --GGAC <b>CCCGUGAGGUUCGGGGC</b> -- <b>UCACAG</b> AG <b>GC</b> <b>UGC</b> CU <b>UGUU</b> <b>UCA</b> -- <b>GG</b> GC <b>AG</b> C--UCUU <b>CC</b> C <b>AG</b>    |
| Horse       | <b>UGGGGACA</b> --GGAC----- <b>AC</b> -- <b>UCGUGA</b> U <b>AGC</b> <b>UCCCUU</b> AGUU <b>UCA</b> -- <b>GG</b> GAUG <b>G</b> C--UCUU <b>---</b> GCAG                           |
| Cat         | <b>UG</b> -----GGAC----- <b>GC</b> -- <b>UCACA</b> U <b>AG</b> <b>UGC</b> CC <b>C</b> AGUU <b>UCA</b> -- <b>GG</b> GC <b>UGG</b> C--UCUU <b>CC</b> U <b>UGCAG</b>              |
| Microbat    | <b>UGGGAGACA</b> --GGAC----- <b>AC</b> -- <b>UCAUGA</b> G <b>CGC</b> <b>UCG</b> CU <b>UCU</b> AGU <b>GUUCA</b> -- <b>GG</b> GG <b>UGG</b> C--UCUU <b>CC</b> AA <b>AG</b>       |
| Megabat     | <b>UGGGAGACA</b> --GGAC----- <b>GU</b> -- <b>UUGUA</b> U <b>AUC</b> <b>UGC</b> CU <b>UCU</b> AGU <b>GUUCA</b> -- <b>GG</b> GG <b>UGG</b> C--UCUU <b>CC</b> C <b>AG</b>         |

## hsa-mir-6777

|              |                                           |                                                                            |
|--------------|-------------------------------------------|----------------------------------------------------------------------------|
| Human        | ACGGG-GAG---UCAGGCAGUGG-----UGGA          | GAUGGAGA-----GC---CCUGAGCCUCCACU-----CUCCUGGCC-----CCC-----AG              |
| Chimp        | ACGGG-GAG---UCAGGCAGUGG-----UGGA          | GAUGGAGA-----G-----CCUGAGCCUCCACU-----CUCCUGGCC-----CCC-----AG             |
| Gorilla      | ACGGG-GAG---UCAGGCAGUGG-----UGGA          | GAUGGAGA-----GC---CCUGAGCCUCCACU-----CUCCUGGCC-----CCC-----AG              |
| Orangutan    | AUGGG-GAG---UCAGGCAGUGG-----UGGA          | GAUGGAGA-----GC---CCUGAGCCUCCACU-----CUCCUGGCC-----CCC-----AG              |
| Rhesus       | AUGGG-GAG---UCAGGCAGUGG-----UGGA          | GAGGGA---A-----GC---CCUGAGCCUCCACU-----CUCCUGGCC-----CCC-----AG            |
| Baboon       | AUGGG-GAG---UCAGGCAGUGG-----UGGA          | GAGGGA---A-----GC---CCUGAGCCUCCACU-----CUCCUGGCC-----CCC-----AG            |
| Marmoset     | AUGGG-GAGGAGUCAGGUGUGG-----UGGA           | GAGGGA---AG-----GC---CCUGAGUCCACU-----CUGCGGUC-----CCC <u>CUUGCUC</u> AG   |
| Mouse_lemur  | UUGGG-GAC---AUA---AGCCG-----UG            | UGUGGAAGGA-----GC---CCUGAACCUGACU-----UCCUGGCC <u>UUCUCG</u> ---CCC-----AG |
| Bushbaby     | CUGGG-GAC---AUA---AGCAG-----UG            | UGUGUGUGUA-----GC---CCUGAACCUGACU-----CUUUGGCC <u>UACUCA</u> ---CCC-----AG |
| TreeShrew    | AGGGG-GCG---CUGGGCGUGGUGUCUGCAGGGGGCGG    | GAGUGGAGA-----GC <u>UGGG</u> CCUGAGCCUCCUCU-----CUC-----C---CGC-----AG     |
| Mouse        | GAGGG-GCA---UGAGGUGAAGCC---GGGAGU---GGG   | GGACAGUA---AA---UCUGAAACGGUGA-----CUACU---CCUUGCCU---CUC-----AG            |
| Rat          | GUGGG-GUG---UGAGGCAGGAGC-----GAG          | GGACAGUC---AU---CCGAAACUAGCA---UUACU---CCUACCC---CUC-----AG                |
| Kangaroo_rat | GUGGGUACU---UGAAGCAGCAGAUACGGGGGAGA---GGG | GGACAG---GG---CCUGAACCUGGCCU-----CUCCUGGCC <u>CCACCCA</u> CUC-----AG       |
| Squirrel     | GUGAGGACC---UGAAGCACAGUUGCCUGGAGC---GAG   | GAGCAG---GG---ACGAAUCUUAUCU---CUGCUGCCCU---CCC-----AG                      |
| Dolphin      | --GGG-AUG---UA---UGUGAGGUGUCGGGAGG---GAG  | GGGGCCU---GG---CUGAACCUCUCUGGGCCCUCCUG---CC-----AG                         |
| Cow          | --GGG-ACA---GA---CAUGAGGUGUCUGAAGG---GAG  | GGGCCU---GA---CCUGAACCUCUGGGUUCUCCUG---CC-----AG                           |
| Dog          | --GGG-AUG---UGAGGCAGCAGC-----GGAG         | GAGGAUGGCCU---GG---CCGAAACCACACU---CUCCUGGC---CC-----AG                    |
| Microbat     | --GGC-ACA---GGAAACAGUUGUG-----G           | GAGGGGGCCU---GG---CCUGAACCUGACU---CACCGGC---CC-----AG                      |
| Megabat      | --GGG-ACA---UGAGGCAGCUGGUGGGGGAGA---GAG   | UGGGCCU---GG---CCUGAGCCUCUCU---CUCCGGC---CC-----AG                         |
| Hedgehog     | --GGG-AGA---GUGGACGGGCUGCA---GGUGA        | CGGUCCUGGCCU---GA---CCUAAACCACAA---UCCCUUGC---CC-----AG                    |
| Elephant     | --GGG-GUG---GGGUUGGU-----GGC              | UGCAGCCAA---GC---CCUGAUCACUG-G---CACCUGC---CUC-----AG                      |
| Tenrec       | --GAG-GCG---GAGGUCAG-----GAC              | UGCAGGCCA---GU---CCUGACUGCCCG---CGCCUGCC---CUC-----AG                      |
| Armadillo    | --CGC-CGG---GGGACGGUCUCCC-----GCC         | AGCGCA---C---CCUGAACCAC---A---CGCGCUC---CCC-----AG                         |
| Opossum      | --GG-GAG---CUUUGUGGCC-----UGG             | GGAGGGCAACCCUUU---CCCAAGCCCGACU---CCUU---CUU-----AG                        |
| Wallaby      | AGGGG-GCC---ACAGGUUGGC-----AAG            | CGAACUC---CU---UUGAAGACCCUG---UUUCUU---UU-----AG                           |
| Platypus     | CCGGG-CAA---ACAACGGUGC-----UG             | UUAUCUGAUC---G---GGCGUCCAUC---UCGGU---CC-----AG                            |



## hsa-mir-877

|              |                                 |                                                   |                          |
|--------------|---------------------------------|---------------------------------------------------|--------------------------|
| Human        | GU-AGAGGAGA----U--GGCGCAGGGGACA | CGGGCA--AAG---A-CUUG-----GGGGUUCUGGGACCCUCAGACGUG | UGUCCUCUUCUCCUCCUCCUCCAG |
| Chimp        | GU-AGAGGAGA----U--GGCGCAGGGGACA | GGGCA--AAG---A-CUUG-----GGGGUUCUGGGACCCUCAGACGUG  | UGUCCUCUUCUCCUCCUCCUCCAG |
| Gorilla      | GU-AGAGGAGA----U--GGCGCAGGGGACA | CGGGCA--AAG---A-CUUG-----GGGGUUCUGGGACCCUCAGACGUG | UGUCCUCUUCUCCUCCUCCUCCAG |
| Orangutan    | GU-AGAGGAGA----U--GGCGCAGGGGACA | CGGGCA--AAG---A-CUUG-----GGGGUUCUGGGACCCUCAGACGUG | UGUCCUCUUCUCCUCCUCCUCCAG |
| Rhesus       | GU-AGAGGAGA----U--GGCGCAGGGGACA | CGGGCA--AAG---A-CUUG-----GGGGUUCUGGGACCCUCAGACGUG | UGUCCUCUUCUCCUCCUCCUCCAG |
| Baboon       | GU-AGAGGAGA----U--GGCGCAGGGGACA | CGGGCA--AAG---A-CUUG-----GGGGUUCUGGGACCCUCAGACGUG | UGUCCUCUUCUCCUCCUCCUCCAG |
| Marmoset     | GU-AGAGGAGA----U--GGCGCAGGGGACA | CGGGCA--AAG---A-CUUG-----GGGGUUCUGGGACCCUCAGACGUG | UGUCCUCUUCUCCUCCUCCUCCAG |
| Mouse_lemur  | GU-AGAGGAGA----U--GGCGCAGGGGACA | CGGGCA--AAG---A-CUUG-----GGGGUUCUGGGACCCUCAGACGUG | UGUCCUCUUCUCCUCCUCCUCCAG |
| Mouse        | GU-AGAGGAGA----U--GGCGCAGGGGACA | CGGGCA--AAG---A-CUUG-----GGGGUUCUGGGACCCUCAGACGUG | UGUCCUCUUCUCCUCCUCCUCCAG |
| Rat          | GU-AGAGGAGA----U--GGCGCAGGGGACA | CGGGCA--AAG---A-CUUG-----GGGGUUCUGGGACCCUCAGACGUG | UGUCCUCUUCUCCUCCUCCUCCAG |
| Kangaroo_rat | GU-AGAGGAGA----U--GGCGCAGGGGACA | CGGGCA--AAG---A-CUUG-----GGGGUUCUGGGACCCUCAGACGUG | UGUCCUCUUCUCCUCCUCCUCCAG |
| Guinea_Pig   | GU-AGAGGAGA----U--GGCGCAGGGGACA | CGGGCA--AAG---A-CUUG-----GGGGUUCUGGGACCCUCAGACGUG | UGUCCUCUUCUCCUCCUCCUCCAG |
| Squirrel     | GU-AGAGGAGA----U--GGCGCAGGGGACA | CGGGCA--AAG---A-CUUG-----GGGGUUCUGGGACCCUCAGACGUG | UGUCCUCUUCUCCUCCUCCUCCAG |
| Rabbit       | GU-AGAGGAGA----U--GGCGCAGGGGACA | CGGGCA--AAG---A-CUUG-----GGGGUUCUGGGACCCUCAGACGUG | UGUCCUCUUCUCCUCCUCCUCCAG |
| Pika         | GU-AGAGGAGA----U--GGCGCAGGGGACA | CGGGCA--AAG---A-CUUG-----GGGGUUCUGGGACCCUCAGACGUG | UGUCCUCUUCUCCUCCUCCUCCAG |
| Alpaca       | GU-AGAGGAGA----U--GGCGCAGGGGACA | CGGGCA--AAG---A-CUUG-----GGGGUUCUGGGACCCUCAGACGUG | UGUCCUCUUCUCCUCCUCCUCCAG |
| Dolphin      | GU-AGAGGAGA----U--GGCGCAGGGGACA | CGGGCA--AAG---A-CUUG-----GGGGUUCUGGGACCCUCAGACGUG | UGUCCUCUUCUCCUCCUCCUCCAG |
| Cow          | GU-AGAGGAGA----U--GGCGCAGGGGACA | CGGGCA--AAG---A-CUUG-----GGGGUUCUGGGACCCUCAGACGUG | UGUCCUCUUCUCCUCCUCCUCCAG |
| Horse        | GU-AGAGGAGA----U--GGCGCAGGGGACA | CGGGCA--AAG---A-CUUG-----GGGGUUCUGGGACCCUCAGACGUG | UGUCCUCUUCUCCUCCUCCUCCAG |
| Cat          | GU-AGAGGAGA----U--GGCGCAGGGGACA | CGGGCA--AAG---A-CUUG-----GGGGUUCUGGGACCCUCAGACGUG | UGUCCUCUUCUCCUCCUCCUCCAG |
| Dog          | GU-AGAGGAGA----U--GGCGCAGGGGACA | CGGGCA--AAG---A-CUUG-----GGGGUUCUGGGACCCUCAGACGUG | UGUCCUCUUCUCCUCCUCCUCCAG |
| Megabat      | GU-AGAGGAGA----U--GGCGCAGGGGACA | CGGGCA--AAG---A-CUUG-----GGGGUUCUGGGACCCUCAGACGUG | UGUCCUCUUCUCCUCCUCCUCCAG |
| Hedgehog     | GU-AGAGGAGA----U--GGCGCAGGGGACA | CGGGCA--AAG---A-CUUG-----GGGGUUCUGGGACCCUCAGACGUG | UGUCCUCUUCUCCUCCUCCUCCAG |
| Shrew        | GU-AGAGGAGA----U--GGCGCAGGGGACA | CGGGCA--AAG---A-CUUG-----GGGGUUCUGGGACCCUCAGACGUG | UGUCCUCUUCUCCUCCUCCUCCAG |
| Elephant     | GU-AGAGGAGA----U--GGCGCAGGGGACA | CGGGCA--AAG---A-CUUG-----GGGGUUCUGGGACCCUCAGACGUG | UGUCCUCUUCUCCUCCUCCUCCAG |
| Rock_hyral   | GU-AGAGGAGA----U--GGCGCAGGGGACA | CGGGCA--AAG---A-CUUG-----GGGGUUCUGGGACCCUCAGACGUG | UGUCCUCUUCUCCUCCUCCUCCAG |
| Tenrec       | GU-AGAGGAGA----U--GGCGCAGGGGACA | CGGGCA--AAG---A-CUUG-----GGGGUUCUGGGACCCUCAGACGUG | UGUCCUCUUCUCCUCCUCCUCCAG |
| Opossum      | GU-AGAGGAGA----U--GGCGCAGGGGACA | CGGGCA--AAG---A-CUUG-----GGGGUUCUGGGACCCUCAGACGUG | UGUCCUCUUCUCCUCCUCCUCCAG |
| Medaka       | GU-AGAGGAGA----U--GGCGCAGGGGACA | CGGGCA--AAG---A-CUUG-----GGGGUUCUGGGACCCUCAGACGUG | UGUCCUCUUCUCCUCCUCCUCCAG |
| Zebrafish    | GU-AGAGGAGA----U--GGCGCAGGGGACA | CGGGCA--AAG---A-CUUG-----GGGGUUCUGGGACCCUCAGACGUG | UGUCCUCUUCUCCUCCUCCUCCAG |

### uc002nhg.3

|              |                                                                          |
|--------------|--------------------------------------------------------------------------|
| Human        | CCAGGG--U---GGGAUG---AGGCUUGGGAAAAAUAGAAGCAGCCCUCUUGGCCUCAC--CC-UCUCUAG  |
| Chimp        | CCAGGG--U---GGGAUG---AGGCUUGGGAAAAAUAGAAGCAGCCCUCUUGGCCUCAC--CC-UCUCUAG  |
| Orangutan    | CCAGGG--U---GGGAUG---AGGCUUGGGAAAAAUAGAAGCAGCCCUCUUGGCCUCAC--CC-UCUCUAG  |
| Rhesus       | CUGGGG--U---GGGAUG---AGGCUUGGGAAAAAUAGAAGCAGCCUCUUGGCCUCAC--CC-UCUCUAG   |
| Baboon       | CUGGGG--U---GGGAUG---AGGCUUGGGAAAAAUAGAAGCAGCCUCUUGGCCUCAC--CC-UCUCUAG   |
| Marmoset     | CCAGGG--U---GGGAUG---AGGCUUGGGAAAAAUAGAAGCAGCCCUCUUGGCCU---CC-UUCUCUAG   |
| Bushbaby     | CUGAGG--U---GGGAUG---AGGCAU-GAAAGAAUAGAACAUCCUCUUGGCCUC--GG-UCCCUCAG     |
| Squirrel     | CGCAGC--C---AAUA-G---ACCCCG-----C---CCUCUUGGCC-UC--UGGUCACAG             |
| Dolphin      | CCGAAG--U---GGGAGG---AGGCUGGAA-----ACC---CCUCUUGCCAUUCCUG-UC---CAG       |
| Cow          | CUGAAG--UGGAAGGGAG---AAGCGUGGAAAGUAAUAGAAAGCCGCCCCUGCCAAUCCGUG-UC---CAG  |
| Cat          | CUGAGGA-C---GGGAGG---AGCAUGGAAAGGAUAGAAACCCUCCUGUGUCCGCUU--GG-UC---CAG   |
| Dog          | CUGGGGGUG---GGGGG---AAGCAUAGAAAGCAUAGAAACUCCUCCUGUCCACUU--CG-UC---CAG    |
| Megabat      | CUGAGG--U---AGGAGG---AGGCAUGGAAAGAAUAG-AAACAUCUUCUUGUCCAUUU--UG-UC---CAG |
| X_tropicalis | CCUAGA--U---UGAUUCAAAAUAUGGAGACAUA---AAAU-UUCUUGUUCUUAU---UUCUCUAU       |

## uc002rji.2

|              |                                                                                                  |
|--------------|--------------------------------------------------------------------------------------------------|
| Human        | UACCC---GGAGGCUGGAUG----AUGCUUGGGGGAAAGU-----GUGAACAAACUCAGC- UAAGC---U---CCCUGCC---UCCUG---UAG  |
| Chimp        | UACCC---GGAGGCUGGAUG----AUGCUUGGGGGAAAGU-----GUGAACAAACUCAGC- UAAGC---U---CCCUGCC---UCCUG---UAG  |
| Gorilla      | UACCC---GGAGGCUGGAUG----AUGCUUGGGGGAAAGU-----GUGAACAAACUCAGC- UAAGC---U---CCCUGCC---UCCUG---UAG  |
| Orangutan    | UACCC---GGAGGCUGGAUG----AUGCUUGGGGGAAAGU-----GUGAACAAACUCAGC- UAAGC---U---CCCUGCC---UCCUG---UAG  |
| Rhesus       | UACCU---GGAGGCUGGAUG----AUCUUGGGGGAAAGU-----GUGAACAAACUCAGC- UAAGC---U---CCCUGCC---UCCUG---UAG   |
| Baboon       | UACCU---GGAGGCUGGAUG----AUCUUGGGGGAAAGU-----GUGAACAAACUCAGC- UAAGC---U---CCCUGCC---UCCUG---UAG   |
| Marmoset     | GACCU---AGAGACUGGAUG----AUGCUUGGGGGAAAGU-----GUGAACAAACUCAGC- UAAGC---U---CCCUGCC---UCCUG---UAG  |
| Bushbaby     | GACCU---GAUCCCGAAGC---A-UGUUGGGAAAGU-----GUGAACAAACUCAGC- UAAGC---U---CCCUGCC---UCCUG---UAG      |
| TreeShrew    | GGCCU---GGAGGCUGGAUG----CUGUCCAUGGGUGUAU-----GUGAACAAACUCAGC- UAAGC---U---CCCUGCC---UCCUG---UAG  |
| Mouse        | AGCCG---CGGGC---GGAUG----UCGCUUGGGGGAAAGU-----GUGAACAAACUCAGC- UAAGC---U---CCCUGCC---UCCUG---UAG |
| Rat          | AGCCGGGUUGGGCUGGAUG----UUGUCUUGGGAAAGU-----GUGAACAAACUCAGC- UAAGC---U---CCCUGCC---UCCUG---UAG    |
| Kangaroo_rat | GGCUG---GGAGGCUGGAUG----AUGCUUGGGGGAAAGU-----GUGAACAAACUCAGC- UAAGC---U---CCCUGCC---UCCUG---UAG  |
| Guinea_Pig   | GGGCU---GGAGCCUGAUG----AUGCUUGGGAAAGU-----GUGAACAAACUCAGC- UAAGC---U---CCCUGCC---UCCUG---UAG     |
| Squirrel     | GGCCU---AUAGCCUGGAUG----GUGUUGAGGUAU-----GUGAACAAACUCAGC- UAAGC---U---CCCUGCC---UCCUG---UAG      |
| Rabbit       | GGCC---GGAGGCUGGAUG----AUGCUUGGGGGAAAGU-----GUGAACAAACUCAGC- UAAGC---U---CCCUGCC---UCCUG---UAG   |
| Pika         | GGCCG---UCUGGGUG----AUGCUUGGGGGAAAGU-----GUGAACAAACUCAGC- UAAGC---U---CCCUGCC---UCCUG---UAG      |
| Alpaca       | GGCC---AGAGGCUGGAUG----A-UGUCAUGGGUGAGU-----GUGAACAAACUCAGC- UAAGC---U---CCCUGCC---UCCUG---UAG   |
| Dolphin      | GGCU---GGAGGCUGGAUG----A-CGUCAGGGUGAGU-----GUGAACAAACUCAGC- UAAGC---U---CCCUGCC---UCCUG---UAG    |
| Cow          | GGCU---GGAGGCUGGAUG----G-CAUCAUGGGUGAGU-----GUGAACAAACUCAGC- UAAGC---U---CCCUGCC---UCCUG---UAG   |
| Horse        | GGCU---GGAGGCUGGAUG----A-UGUCAUGGGUGAGU-----GUGAACAAACUCAGC- UAAGC---U---CCCUGCC---UCCUG---UAG   |
| Cat          | GGCU---GGAGGCUGGAUG----C-GUCAUGGGUGAGU-----GUGAACAAACUCAGC- UAAGC---U---CCCUGCC---UCCUG---UAG    |
| Dog          | GGCU---GGAUGCUGGAU----A-AGUCAUGGGUGAGU-----GUGAACAAACUCAGC- UAAGC---U---CCCUGCC---UCCUG---UAG    |
| Microbat     | GGCU---GGAGGAU----GGCAUGGGUGAGU-----GUGAACAAACUCAGC- UAAGC---U---CCCUGCC---UCCUG---UAG           |
| Megabat      | GGCU---GGAGGAU----GUCAUGGGUGAGU-----GUGAACAAACUCAGC- UAAGC---U---CCCUGCC---UCCUG---UAG           |
| Hedgehog     | GGCG---GGAGCUGGGC---C-UGUCCUGGGUGAGU-----GUGAACAAACUCAGC- UAAGC---U---CCCUGCC---UCCUG---UAG      |
| Elephant     | GGGCU---GGAGGCUGGAUG----AUGCUUGGGGGAAAGU-----GUGAACAAACUCAGC- UAAGC---U---CCCUGCC---UCCUG---UAG  |
| Rock_hyrax   | GGGCA---GGAGGCUGGAUG----AUGCUUGGGGGAAAGU-----GUGAACAAACUCAGC- UAAGC---U---CCCUGCC---UCCUG---UAG  |
| Tenrec       | ---GCU---GGAGG-UGGAUGGGACGCGCUCAUGAGUGU-----GUGAACAAACUCAGC- UAAGC---U---CCCUGCC---UCCUG---UAG   |
| Armadillo    | GGGUG---GGAGCUGGGC---GGUGAGU-----GUGAACAAACUCAGC- UAAGC---U---CCCUGCC---UCCUG---UAG              |
| Sloth        | GGGCC---AGAGGCACCGG---GUAUCCAUGGGUGAGU-----GUGAACAAACUCAGC- UAAGC---U---CCCUGCC---UCCUG---UAG    |
| Opossum      | GC---AGAGCACAAGUG----AGGCUCAUGGGUGAGU-----GUGAACAAACUCAGC- UAAGC---U---CCCUGCC---UCCUG---UAG     |
| Wallaby      | UGC---AGAGCUGAGUG----A-----AUCUCUGU-----GUGAACAAACUCAGC- UAAGC---U---CCCUGCC---UCCUG---UAG       |
| Platypus     | GGGCG---GGGGGGGGGG---UGGUUCUGGGGGGUGCCCGUGACGGUACCGCGCCUGCCSA-U---GC---GUCUGC---GCG---CAG        |

uc003atr.19

|              |                                                                                                                       |
|--------------|-----------------------------------------------------------------------------------------------------------------------|
| Human        | GUGGCCUGGCCCC--AG---GUUGGGGG-----GA-----C--A-----CGGG--UGG--GUCC-CG-----GCA----CC-CCUCCCCUGACCACCGUGCC--UCU-----CCCAG |
| Chimp        | GUGGCCUGGCCCC--AG---GUUGGGGG-----GA-----C--A-----CGGG--UGG--GUCC-CG-----GCA----CC-CCUCCCCUGACCACCGUGCC--UCU-----CCCAG |
| Gorilla      | GUGGCCUGGCCCC--AG---GUUGGGGG-----GA-----C--A-----CGGG--UGG--GUCC-CG-----GCA----CC-CCUCCCCUGACCACCGUGCC--UCU-----CCCAG |
| Orangutan    | GUGGCCUGGCCCC--AG---GUUGGGGG-----GA-----C--A-----CGGG--UGG--GUCC-CG-----GCA----CC-CCUCCCCUGACCACCGUGCC--UCU-----CCCAG |
| Rhesus       | GUGGCCUGGCCCC--AG---GUUGGGGG-----GA-----C--A-----CGGG--UGG--GUCC-CG-----GCA----CC-CCUCCCCUGACCACCGUGCC--UCU-----CCCAG |
| Baboon       | GUGGCCUGGCCCC--AG---GUUGGGGG-----GA-----C--A-----CGGG--UGG--GUCC-CG-----GCA----CC-CCUCCCCUGACCACCGUGCC--UCU-----CCCAG |
| Marmoset     | GUGGCCUGGCCCC--AG---GUUGGGGG-----GA-----C--A-----CGGG--UGG--GUCC-CG-----GCA----CC-CCUCCCCUGACCACCGUGCC--UCU-----CCCAG |
| Mouse_lemur  | GUGGCCUGGCCCC--AG---GUUGGGGG-----GA-----C--A-----CGGG--UGG--GUCC-CG-----GCA----CC-CCUCCCCUGACCACCGUGCC--UCU-----CCCAG |
| Mouse        | GUGGCCUGGCCCC--AG---GUUGGGGG-----GA-----C--A-----CGGG--UGG--GUCC-CG-----GCA----CC-CCUCCCCUGACCACCGUGCC--UCU-----CCCAG |
| Rat          | GUGGCCUGGCCCC--AG---GUUGGGGG-----GA-----C--A-----CGGG--UGG--GUCC-CG-----GCA----CC-CCUCCCCUGACCACCGUGCC--UCU-----CCCAG |
| Kangaroo_rat | GUGGCCUGGCCCC--AG---GUUGGGGG-----GA-----C--A-----CGGG--UGG--GUCC-CG-----GCA----CC-CCUCCCCUGACCACCGUGCC--UCU-----CCCAG |
| Guinea_Pig   | GUGGCCUGGCCCC--AG---GUUGGGGG-----GA-----C--A-----CGGG--UGG--GUCC-CG-----GCA----CC-CCUCCCCUGACCACCGUGCC--UCU-----CCCAG |
| Squirrel     | GUGGCCUGGCCCC--AG---GUUGGGGG-----GA-----C--A-----CGGG--UGG--GUCC-CG-----GCA----CC-CCUCCCCUGACCACCGUGCC--UCU-----CCCAG |
| Rabbit       | GUGGCCUGGCCCC--AG---GUUGGGGG-----GA-----C--A-----CGGG--UGG--GUCC-CG-----GCA----CC-CCUCCCCUGACCACCGUGCC--UCU-----CCCAG |
| Pika         | GUGGCCUGGCCCC--AG---GUUGGGGG-----GA-----C--A-----CGGG--UGG--GUCC-CG-----GCA----CC-CCUCCCCUGACCACCGUGCC--UCU-----CCCAG |
| Dolphin      | GUGGCCUGGCCCC--AG---GUUGGGGG-----GA-----C--A-----CGGG--UGG--GUCC-CG-----GCA----CC-CCUCCCCUGACCACCGUGCC--UCU-----CCCAG |
| Cat          | GUGGCCUGGCCCC--AG---GUUGGGGG-----GA-----C--A-----CGGG--UGG--GUCC-CG-----GCA----CC-CCUCCCCUGACCACCGUGCC--UCU-----CCCAG |
| Dog          | GUGGCCUGGCCCC--AG---GUUGGGGG-----GA-----C--A-----CGGG--UGG--GUCC-CG-----GCA----CC-CCUCCCCUGACCACCGUGCC--UCU-----CCCAG |
| Microbat     | GUGGCCUGGCCCC--AG---GUUGGGGG-----GA-----C--A-----CGGG--UGG--GUCC-CG-----GCA----CC-CCUCCCCUGACCACCGUGCC--UCU-----CCCAG |
| Megabat      | GUGGCCUGGCCCC--AG---GUUGGGGG-----GA-----C--A-----CGGG--UGG--GUCC-CG-----GCA----CC-CCUCCCCUGACCACCGUGCC--UCU-----CCCAG |
| Hedgehog     | GUGGCCUGGCCCC--AG---GUUGGGGG-----GA-----C--A-----CGGG--UGG--GUCC-CG-----GCA----CC-CCUCCCCUGACCACCGUGCC--UCU-----CCCAG |
| Shrew        | GUGGCCUGGCCCC--AG---GUUGGGGG-----GA-----C--A-----CGGG--UGG--GUCC-CG-----GCA----CC-CCUCCCCUGACCACCGUGCC--UCU-----CCCAG |
| Elephant     | GUGGCCUGGCCCC--AG---GUUGGGGG-----GA-----C--A-----CGGG--UGG--GUCC-CG-----GCA----CC-CCUCCCCUGACCACCGUGCC--UCU-----CCCAG |
| Wallaby      | GUGGCCUGGCCCC--AG---GUUGGGGG-----GA-----C--A-----CGGG--UGG--GUCC-CG-----GCA----CC-CCUCCCCUGACCACCGUGCC--UCU-----CCCAG |

uc004bvw.9

|              |              |              |         |            |     |      |      |        |       |      |     |        |
|--------------|--------------|--------------|---------|------------|-----|------|------|--------|-------|------|-----|--------|
| Human        | GUGUGGAGGGAA | U GGGGGCUAUG | UGAG GG | AGCAGGGCUG | GGG | UCCC | GGGA | CU AAG | C UCC | CCUU | UUC | UCCCAG |
| Chimp        | GUGUGGAGGGAA | U GGGGGCUAUG | UGAG GG | AGCAGGGCUG | GGG | UCCC | GGGA | CU AAG | C UCC | CCUU | UUC | UCCCAG |
| Gorilla      | GUGUGGAGGGAA | U GGGGGCUAUG | UGAG GG | AGCAGGGCUG | GGG | UCCC | GGGA | CU AAG | C UCC | CCUU | UUC | UCCCAG |
| Orangutan    | GUGUGGAGGGAA | U GGGGGCUAUG | UGAG GG | AGCAGGGCUG | GGG | UCCC | GGGA | CU AAG | C UCC | CCUU | UUC | UCCCAG |
| Rhesus       | GUGUGGAGGGAA | U GGGGGCUAUG | GAG GG  | AGCA GGCUG | GGG | UCCC | GGGA | CU AA  | C UCC | CCUU | UUC | UCCCAG |
| Baboon       | GUGUGGAGGGAA | U GGGGGCUAUG | GAG GG  | AGCA GGCUG | GGG | UCCC | GGGA | CU AAG | C UCC | CCUU | UUC | UCCCAG |
| Marmoset     | GUGUGGAGGGAA | U GGGGGCUAUG | GAG GG  | AGCA GGCUG | GGG | UCCC | GGGA | CU AAG | C UCC | CCUU | UUC | UCCCAG |
| Mouse_lemur  | GUGUGGAGGGAA | U GGGGGCUAUG | GAG GG  | AGCA GGCUG | GGG | UCCC | GGGA | CU AAG | C UCC | CCUU | UUC | UCCCAG |
| TreeShrew    | GUGUGGAGGGAA | U GGGGGCUAUG | GAG GG  | AGCA GGCUG | GGG | UCCC | GGGA | CU AAG | C UCC | CCUU | UUC | UCCCAG |
| Mouse        | GUGUGGAGGGAA | U GGGGGCUAUG | GAG GG  | AGCA GGCUG | GGG | UCCC | GGGA | CU AAG | C UCC | CCUU | UUC | UCCCAG |
| Rat          | GUGUGGAGGGAA | U GGGGGCUAUG | GAG GG  | AGCA GGCUG | GGG | UCCC | GGGA | CU AAG | C UCC | CCUU | UUC | UCCCAG |
| Kangaroo_rat | GUGUGGAGGGAA | U GGGGGCUAUG | GAG GG  | AGCA GGCUG | GGG | UCCC | GGGA | CU AAG | C UCC | CCUU | UUC | UCCCAG |
| Guinea_Pig   | GUGUGGAGGGAA | U GGGGGCUAUG | GAG GG  | AGCA GGCUG | GGG | UCCC | GGGA | CU AAG | C UCC | CCUU | UUC | UCCCAG |
| Squirrel     | GUGUGGAGGGAA | U GGGGGCUAUG | GAG GG  | AGCA GGCUG | GGG | UCCC | GGGA | CU AAG | C UCC | CCUU | UUC | UCCCAG |
| Rabbit       | GUGUGGAGGGAA | U GGGGGCUAUG | GAG GG  | AGCA GGCUG | GGG | UCCC | GGGA | CU AAG | C UCC | CCUU | UUC | UCCCAG |
| Dolphin      | GUGUGGAGGGAA | U GGGGGCUAUG | GAG GG  | AGCA GGCUG | GGG | UCCC | GGGA | CU AAG | C UCC | CCUU | UUC | UCCCAG |
| Cow          | GUGUGGAGGGAA | U GGGGGCUAUG | GAG GG  | AGCA GGCUG | GGG | UCCC | GGGA | CU AAG | C UCC | CCUU | UUC | UCCCAG |
| Horse        | GUGUGGAGGGAA | U GGGGGCUAUG | GAG GG  | AGCA GGCUG | GGG | UCCC | GGGA | CU AAG | C UCC | CCUU | UUC | UCCCAG |
| Cat          | GUGUGGAGGGAA | U GGGGGCUAUG | GAG GG  | AGCA GGCUG | GGG | UCCC | GGGA | CU AAG | C UCC | CCUU | UUC | UCCCAG |
| Dog          | GUGUGGAGGGAA | U GGGGGCUAUG | GAG GG  | AGCA GGCUG | GGG | UCCC | GGGA | CU AAG | C UCC | CCUU | UUC | UCCCAG |
| Microbat     | GUGUGGAGGGAA | U GGGGGCUAUG | GAG GG  | AGCA GGCUG | GGG | UCCC | GGGA | CU AAG | C UCC | CCUU | UUC | UCCCAG |
| Megabat      | GUGUGGAGGGAA | U GGGGGCUAUG | GAG GG  | AGCA GGCUG | GGG | UCCC | GGGA | CU AAG | C UCC | CCUU | UUC | UCCCAG |
| Elephant     | GUGUGGAGGGAA | U GGGGGCUAUG | GAG GG  | AGCA GGCUG | GGG | UCCC | GGGA | CU AAG | C UCC | CCUU | UUC | UCCCAG |
| Rock_hyrax   | GUGUGGAGGGAA | U GGGGGCUAUG | GAG GG  | AGCA GGCUG | GGG | UCCC | GGGA | CU AAG | C UCC | CCUU | UUC | UCCCAG |
| Tenrec       | GUGUGGAGGGAA | U GGGGGCUAUG | GAG GG  | AGCA GGCUG | GGG | UCCC | GGGA | CU AAG | C UCC | CCUU | UUC | UCCCAG |
| Armadillo    | GUGUGGAGGGAA | U GGGGGCUAUG | GAG GG  | AGCA GGCUG | GGG | UCCC | GGGA | CU AAG | C UCC | CCUU | UUC | UCCCAG |
| Wallaby      | GUGUGGAGGGAA | U GGGGGCUAUG | GAG GG  | AGCA GGCUG | GGG | UCCC | GGGA | CU AAG | C UCC | CCUU | UUC | UCCCAG |
| Platypus     | GUGUGGAGGGAA | U GGGGGCUAUG | GAG GG  | AGCA GGCUG | GGG | UCCC | GGGA | CU AAG | C UCC | CCUU | UUC | UCCCAG |

uc011maw.1

|              |                         |                   |                             |        |          |          |     |
|--------------|-------------------------|-------------------|-----------------------------|--------|----------|----------|-----|
| Human        | GUCAGUGGGAAGCCAGGGC-ACG | CAGGAGGAGCUC-CACA | GORGU--CG--GAGGGAA--CCACG-- | AUCUGA | GCCCGUCC | -UCCCG-- | CAG |
| Chimp        | GUCAGUGGGAAGCCAGGGC-ACG | CAGGAGGAGCUC-CACA | GAGGU--GAGGGAA--CCACG--     | AUCUGA | GCCCGUCC | -UCCCG-- | CAG |
| Orangutan    | GUCAGUGGGAAGCCAGGGC-ACG | CAGGAGGAGCUC-CACA | GAGGU--GAGGGAA--CCACG--     | AUCUGA | GCCCGUCC | -UCCCG-- | CAG |
| Rhesus       | GUCAGUGGGAAGCCAGGGC-ACG | CAGGAGGAGCUC-CACA | GAGGU--GAGGGAA--CCACG--     | AUCUGA | GCCCGUCC | -UCCCG-- | CAG |
| Baboon       | GUCAGUGGGAAGCCAGGGC-ACG | CAGGAGGAGCUC-CACA | GAGGU--GAGGGAA--CCACG--     | AUCUGA | GCCCGUCC | -UCCCG-- | CAG |
| Marmoset     | GUCAGUGGGAAGCCAGGGC-ACG | CAGGAGGAGCUC-CACA | GAGGU--GAGGGAA--CCACG--     | AUCUGA | GCCCGUCC | -UCCCG-- | CAG |
| Tarsier      | GUCAGUGGGAAGCCAGGGC-ACG | CAGGAGGAGCUC-CACA | GAGGU--GAGGGAA--CCACG--     | AUCUGA | GCCCGUCC | -UCCCG-- | CAG |
| Mouse_lemur  | GUCAGUGGGAAGCCAGGGC-ACG | CAGGAGGAGCUC-CACA | GAGGU--GAGGGAA--CCACG--     | AUCUGA | GCCCGUCC | -UCCCG-- | CAG |
| Bushbaby     | GUCAGUGGGAAGCCAGGGC-ACG | CAGGAGGAGCUC-CACA | GAGGU--GAGGGAA--CCACG--     | AUCUGA | GCCCGUCC | -UCCCG-- | CAG |
| TreeShrew    | GUCAGUGGGAAGCCAGGGC-ACG | CAGGAGGAGCUC-CACA | GAGGU--GAGGGAA--CCACG--     | AUCUGA | GCCCGUCC | -UCCCG-- | CAG |
| Mouse        | GUCAGUGGGAAGCCAGGGC-ACG | CAGGAGGAGCUC-CACA | GAGGU--GAGGGAA--CCACG--     | AUCUGA | GCCCGUCC | -UCCCG-- | CAG |
| Rat          | GUCAGUGGGAAGCCAGGGC-ACG | CAGGAGGAGCUC-CACA | GAGGU--GAGGGAA--CCACG--     | AUCUGA | GCCCGUCC | -UCCCG-- | CAG |
| Kangaroo_rat | GUCAGUGGGAAGCCAGGGC-ACG | CAGGAGGAGCUC-CACA | GAGGU--GAGGGAA--CCACG--     | AUCUGA | GCCCGUCC | -UCCCG-- | CAG |
| Guinea_Pig   | GUCAGUGGGAAGCCAGGGC-ACG | CAGGAGGAGCUC-CACA | GAGGU--GAGGGAA--CCACG--     | AUCUGA | GCCCGUCC | -UCCCG-- | CAG |
| Squirrel     | GUCAGUGGGAAGCCAGGGC-ACG | CAGGAGGAGCUC-CACA | GAGGU--GAGGGAA--CCACG--     | AUCUGA | GCCCGUCC | -UCCCG-- | CAG |
| Rabbit       | GUCAGUGGGAAGCCAGGGC-ACG | CAGGAGGAGCUC-CACA | GAGGU--GAGGGAA--CCACG--     | AUCUGA | GCCCGUCC | -UCCCG-- | CAG |
| Dolphin      | GUCAGUGGGAAGCCAGGGC-ACG | CAGGAGGAGCUC-CACA | GAGGU--GAGGGAA--CCACG--     | AUCUGA | GCCCGUCC | -UCCCG-- | CAG |
| Cow          | GUCAGUGGGAAGCCAGGGC-ACG | CAGGAGGAGCUC-CACA | GAGGU--GAGGGAA--CCACG--     | AUCUGA | GCCCGUCC | -UCCCG-- | CAG |
| Horse        | GUCAGUGGGAAGCCAGGGC-ACG | CAGGAGGAGCUC-CACA | GAGGU--GAGGGAA--CCACG--     | AUCUGA | GCCCGUCC | -UCCCG-- | CAG |
| Dog          | GUCAGUGGGAAGCCAGGGC-ACG | CAGGAGGAGCUC-CACA | GAGGU--GAGGGAA--CCACG--     | AUCUGA | GCCCGUCC | -UCCCG-- | CAG |
| Megabat      | GUCAGUGGGAAGCCAGGGC-ACG | CAGGAGGAGCUC-CACA | GAGGU--GAGGGAA--CCACG--     | AUCUGA | GCCCGUCC | -UCCCG-- | CAG |
| Hedgehog     | GUCAGUGGGAAGCCAGGGC-ACG | CAGGAGGAGCUC-CACA | GAGGU--GAGGGAA--CCACG--     | AUCUGA | GCCCGUCC | -UCCCG-- | CAG |
| Elephant     | GUCAGUGGGAAGCCAGGGC-ACG | CAGGAGGAGCUC-CACA | GAGGU--GAGGGAA--CCACG--     | AUCUGA | GCCCGUCC | -UCCCG-- | CAG |
| Rock_hyrax   | GUCAGUGGGAAGCCAGGGC-ACG | CAGGAGGAGCUC-CACA | GAGGU--GAGGGAA--CCACG--     | AUCUGA | GCCCGUCC | -UCCCG-- | CAG |
| Tenrec       | GUCAGUGGGAAGCCAGGGC-ACG | CAGGAGGAGCUC-CACA | GAGGU--GAGGGAA--CCACG--     | AUCUGA | GCCCGUCC | -UCCCG-- | CAG |
