# Supplementary material for: Analysis of Nearly One Thousand Mammalian Mirtrons Reveals Novel Features of Dicer Substrates
Source: PubMed Central journal article supplement (PMC4556696; doi:10.1371/journal.pcbi.1004441), 2015-09-01
Supplement: pcbi.1004441.s008.pdf [file pcbi.1004441.s008.pdf]

## Mouse 5' end of 5p arm of 3'-tailed/conventional mirtrons

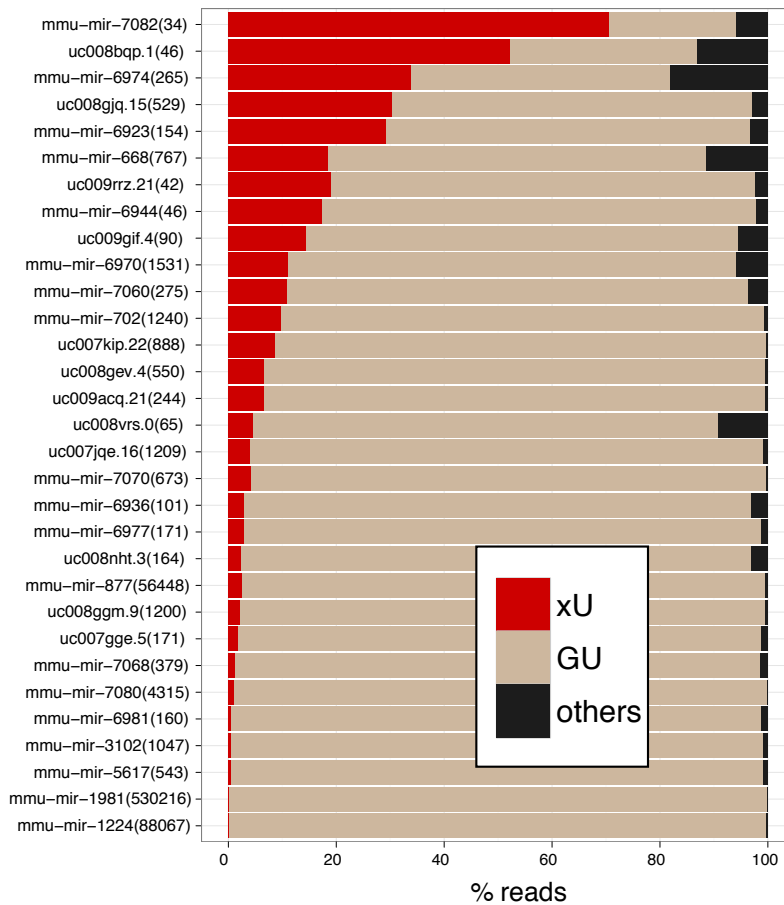

Summary of 5' heterogeneity amongst 5p reads from mouse conventional and 3'-tailed mirtrons. Since these are generated directly by splicing, such 5p reads should bear the 5'-GU splice donor sequence. We tally the frequency of unmodified GU reads, "guanine-decapitated" reads ("xU"), and other reads in this graph. Many mirtron hairpins are subject to substantial 5' decapitation.
