# Supplementary material for: Analysis of Nearly One Thousand Mammalian Mirtrons Reveals Novel Features of Dicer Substrates
Source: PLoS Comput Biol. 2015 Sep 1;11(9):e1004441. doi: 10.1371/journal.pcbi.1004441 (PMC4556696; doi:10.1371/journal.pcbi.1004441)
Supplement: S1 Table — (XLS) [file pcbi.1004441.s009.xls]

## Sheet: human_tot_libs
gsm	data_label	IP	Mutant	characteristics
DRX000313	DRR000555			A comprehensive survey of 3' animal miRNA modification events and a possible role for 3' adenylation in modulating miRNA targeting effectiveness
DRX000314	DRR000556			A comprehensive survey of 3' animal miRNA modification events and a possible role for 3' adenylation in modulating miRNA targeting effectiveness
DRX000315	DRR000557			A comprehensive survey of 3' animal miRNA modification events and a possible role for 3' adenylation in modulating miRNA targeting effectiveness
DRX000316	DRR000558			A comprehensive survey of 3' animal miRNA modification events and a possible role for 3' adenylation in modulating miRNA targeting effectiveness
DRX000317	DRR000559			A comprehensive survey of 3' animal miRNA modification events and a possible role for 3' adenylation in modulating miRNA targeting effectiveness
DRX000318	DRR000560	ago1		A comprehensive survey of 3' animal miRNA modification events and a possible role for 3' adenylation in modulating miRNA targeting effectiveness
DRX000319	DRR000561	ago2		A comprehensive survey of 3' animal miRNA modification events and a possible role for 3' adenylation in modulating miRNA targeting effectiveness
DRX000320	DRR000562	ago3		A comprehensive survey of 3' animal miRNA modification events and a possible role for 3' adenylation in modulating miRNA targeting effectiveness
GSM1105748	GSM1105748AGO1	ago1		antibodies: monoclonal antibody against endogenous human Argonaute1, clone 4B8 (Beitzinger et al., 2007)barcode srna cloning: ACTAcell line: HeLa
GSM1105749	GSM1105749AGO2	ago2		antibodies: monoclonal antibody against endogenous human Argonaute2, clone 11A9 (Ruedel et al., 2008)barcode srna cloning: GTAAcell line: HeLa
GSM1105750	GSM1105750AGO3	ago3		antibodies: monoclonal antibody against endogenous human Argonaute3, clone 5A3 Weinmann et al., 2009)barcode srna cloning: TACAcell line: HeLa
GSM1105751	GSM1105751AGO4	ago4		antibodies: monoclonal antibody against endogenous human Argonaute4, clone 6C10 (Petri et al., 2011)barcode srna cloning: ATGAcell line: HeLa
GSM1105752	GSM1105752CONTROL			antibodies: monoclonal antibody against RmC, rat protein (complement system)barcode srna cloning: GAGAcell line: HeLa
GSM1105753	GSM1105753INPUT			antibodies: nonebarcode srna cloning: CATAcell line: HeLa
SRX039177	SRR095854			Bar-coding bias in high-throughput multiplex sequencing of miRNA
GSM677703	SRR107296			cell line name: IMR90passages: 14
GSM677704	SRR107297			cell line name: IMR90passages: 34
SRX128911	SRR444063			cell line: A2058
SRX128912	SRR444064			cell line: A375P
SRX128913	SRR444065			cell line: A375SM
GSM796035	SRR343332			cell line: BC-1
GSM796036	SRR343333			cell line: BC-3
SRX128914	SRR444066			cell line: C32
GSM956925	GSM956925Ago2	ago2		cell line: HEK293 cell linepassages: 15-20ip antibody: Anti-FLAG (Sigma, Catalog# A2220, Lot# SLBB7030)
GSM956925	GSM956925Ago2D5	ago2		cell line: HEK293 cell linepassages: 15-20ip antibody: Anti-FLAG (Sigma, Catalog# A2220, Lot# SLBB7030)
GSM956925	GSM956925Ago2PAZ	ago2		cell line: HEK293 cell linepassages: 15-20ip antibody: Anti-FLAG (Sigma, Catalog# A2220, Lot# SLBB7030)
GSM956925	GSM956925AGO2Paz8	ago2		cell line: HEK293 cell linepassages: 15-20ip antibody: Anti-FLAG (Sigma, Catalog# A2220, Lot# SLBB7030)
GSM956925	GSM956925F181A			cell line: HEK293 cell linepassages: 15-20ip antibody: Anti-FLAG (Sigma, Catalog# A2220, Lot# SLBB7030)
GSM956925	GSM956925Paz8D5			cell line: HEK293 cell linepassages: 15-20ip antibody: Anti-FLAG (Sigma, Catalog# A2220, Lot# SLBB7030)
GSM956925	GSM956925PazD5			cell line: HEK293 cell linepassages: 15-20ip antibody: Anti-FLAG (Sigma, Catalog# A2220, Lot# SLBB7030)
GSM769509	SRR326279			cell line: MCF-7
GSM769510	SRR326280			cell line: MCF-7
GSM769511	SRR326281			cell line: MCF-7
GSM769512	SRR326282			cell line: MCF-7
GSM850204	SRR390725			cell line: WI-38antibody: H3K9me2antibody vendor: Upstate
GSM850202	SRR390723			cell line: WI-38antibody: none
GSM850203	SRR390724			cell line: WI-38antibody: pan AGOantibody vendor: Upstate
SRX128916	SRR444068			cell line: WM1552C
SRX128915	SRR444067			cell line: WM35
GSM830252	SRR363675			cell type: human foreskin fibroblasts (HFF)treatment: HCMV infected
GSM830253	SRR363676			cell type: human foreskin fibroblasts (HFF)treatment: HCMV infected
GSM830250	SRR363673			cell type: human foreskin fibroblasts (HFF)treatment: mock infected
GSM830251	SRR363674			cell type: human foreskin fibroblasts (HFF)treatment: mock infected
SRX182778	SRR553572			GSE40499: Evolution of mammalian miRNA genes
SRX182779	SRR553573			GSE40499: Evolution of mammalian miRNA genes
SRX182780	SRR553574			GSE40499: Evolution of mammalian miRNA genes
SRX182781	SRR553575			GSE40499: Evolution of mammalian miRNA genes
SRX182782	SRR553576			GSE40499: Evolution of mammalian miRNA genes
GSM1354722	SRR1200701			Next generation sequencing of small RNAs isolated from exosomes in human semen
GSM1354723	SRR1200702			Next generation sequencing of small RNAs isolated from exosomes in human semen
GSM1354724	SRR1200703			Next generation sequencing of small RNAs isolated from exosomes in human semen
GSM1354725	SRR1200704			Next generation sequencing of small RNAs isolated from exosomes in human semen
GSM1354726	SRR1200705			Next generation sequencing of small RNAs isolated from exosomes in human semen
GSM1354727	SRR1200706			Next generation sequencing of small RNAs isolated from exosomes in human semen
GSM1354728	SRR1200707			Next generation sequencing of small RNAs isolated from exosomes in human semen
GSM1354729	SRR1200708			Next generation sequencing of small RNAs isolated from exosomes in human semen
GSM1354730	SRR1200709			Next generation sequencing of small RNAs isolated from exosomes in human semen
GSM1354731	SRR1200710			Next generation sequencing of small RNAs isolated from exosomes in human semen
GSM1354732	SRR1200711			Next generation sequencing of small RNAs isolated from exosomes in human semen
GSM1354733	SRR1200712			Next generation sequencing of small RNAs isolated from exosomes in human semen
DRX001036	DRR001482			pre-miRNA profiles obtained through application of locked nucleic acids reveals complex 5?/3? arm variation including concomitant cleavage and polyuridylation patterns
DRX001037	DRR001483			pre-miRNA profiles obtained through application of locked nucleic acids reveals complex 5?/3? arm variation including concomitant cleavage and polyuridylation patterns
DRX001038	DRR001484			pre-miRNA profiles obtained through application of locked nucleic acids reveals complex 5?/3? arm variation including concomitant cleavage and polyuridylation patterns
DRX001039	DRR001485			pre-miRNA profiles obtained through application of locked nucleic acids reveals complex 5?/3? arm variation including concomitant cleavage and polyuridylation patterns
DRX001040	DRR001486			pre-miRNA profiles obtained through application of locked nucleic acids reveals complex 5?/3? arm variation including concomitant cleavage and polyuridylation patterns
DRX001041	DRR001487			pre-miRNA profiles obtained through application of locked nucleic acids reveals complex 5?/3? arm variation including concomitant cleavage and polyuridylation patterns
DRX001042	DRR001488			pre-miRNA profiles obtained through application of locked nucleic acids reveals complex 5?/3? arm variation including concomitant cleavage and polyuridylation patterns
DRX001043	DRR001489			pre-miRNA profiles obtained through application of locked nucleic acids reveals complex 5?/3? arm variation including concomitant cleavage and polyuridylation patterns
GSM1270011	SRR1033840			siTUT4/7 combined
GSM1270012	SRR1033841			siTUT4/7 combined
GSM876013	SRR408573			Small RNA profiles following TUT knock-down in HeLa
GSM876014	SRR408574			Small RNA profiles following TUT knock-down in HeLa
GSM876015	SRR408575			Small RNA profiles following TUT knock-down in HeLa
GSM876016	SRR408576			Small RNA profiles following TUT knock-down in HeLa
GSM876017	SRR408577			Small RNA profiles following TUT knock-down in HeLa
GSM843862	SRR387910	ago2		specific-host: Homo sapienshost cell line: Sup-T-1 (CRL-1942; ATCC)host cell type: T lymphocyteantibody for ip: Ago2
GSM843861	SRR387909			specific-host: Homo sapienshost cell line: Sup-T-1 (CRL-1942; ATCC)host cell type: T lymphocyteantibody for ip: None
SRX084354	SRR314796			subcellular: Mitochondriacell type: 143B cells
SRX087285	SRR324841			subcellular: Mitochondriacell type: 143B cells
SRX128889	SRR444041			tissue: acrolentiginous melanoma (3.0 mm, level IV)
SRX128898	SRR444050			tissue: common nevus
SRX128899	SRR444051			tissue: common nevus
SRX096791	SRR342895			tissue: Left Atrial Heart
SRX096793	SRR342897			tissue: Left Atrial Heart
SRX096795	SRR342899			tissue: Left Atrial Heart
SRX096797	SRR342901			tissue: Left Atrial Heart
SRX128904	SRR444056			tissue: melanocyte-dark
SRX128917	SRR444069			tissue: melanocyte-light
SRX128895	SRR444047			tissue: melanocyte-medium
SRX128903	SRR444055			tissue: melanocyte-medium
SRX128910	SRR444062			tissue: melanocyte-medium
SRX128918	SRR444070			tissue: melanocyte-medium
SRX128888	SRR444040			tissue: metastatic melanoma to lymph node
SRX128897	SRR444049			tissue: metastatic melanoma to lymph node
SRX128905	SRR444057			tissue: metastatic melanoma to skin
SRX128906	SRR444058			tissue: metastatic melanoma to skin
SRX128907	SRR444059			tissue: metastatic melanoma to skin
SRX128890	SRR444042			tissue: metastatic melanoma to the lymph node
SRX128896	SRR444048			tissue: normal lymph node
SRX128891	SRR444043			tissue: normal skin
SRX128893	SRR444045			tissue: normal skin
SRX128908	SRR444060			tissue: normal skin
SRX128909	SRR444061			tissue: normal skin
SRX091742	SRR330904			tissue: normal skindisease state: normal
SRX091743	SRR330905			tissue: normal skindisease state: normal
SRX091744	SRR330906			tissue: normal skindisease state: normal
SRX091745	SRR330907			tissue: normal skindisease state: normal
SRX091746	SRR330908			tissue: normal skindisease state: normal
SRX091747	SRR330909			tissue: normal skindisease state: normal
SRX091748	SRR330910			tissue: normal skindisease state: normal
SRX091749	SRR330911			tissue: normal skindisease state: normal
SRX091750	SRR330912			tissue: normal skindisease state: normal
SRX091751	SRR330913			tissue: normal skindisease state: normal
SRX091752	SRR330914			tissue: normal skindisease state: normal
SRX091753	SRR330915			tissue: normal skindisease state: normal
SRX091754	SRR330916			tissue: normal skindisease state: normal
SRX091755	SRR330917			tissue: normal skindisease state: normal
SRX091756	SRR330918			tissue: normal skindisease state: normal
SRX091757	SRR330919			tissue: normal skindisease state: normal
SRX091758	SRR330920			tissue: normal skindisease state: normal
SRX091759	SRR330921			tissue: normal skindisease state: normal
SRX091760	SRR330922			tissue: normal skindisease state: normal
SRX091761	SRR330923			tissue: normal skindisease state: normal
SRX128892	SRR444044			tissue: primary cutaneous melanoma (11.5 mm, level V)
SRX128902	SRR444054			tissue: primary cutaneous melanoma (2.0 mm, level IV)
SRX128901	SRR444053			tissue: primary cutaneous melanoma (2.5 mm, level IV)
SRX128900	SRR444052			tissue: primary cutaneous melanoma (2.8 mm, level IV)
SRX128894	SRR444046			tissue: primary cutaneous melanoma (4.0 mm, level IV)
SRX096790	SRR342894			tissue: Right Atrial Heart
SRX096792	SRR342896			tissue: Right Atrial Heart
SRX096794	SRR342898			tissue: Right Atrial Heart
SRX096796	SRR342900			tissue: Right Atrial Heart
SRX091695	SRR330857			tissue: skin psoriatic involveddisease state: psoriasis
SRX091696	SRR330858			tissue: skin psoriatic involveddisease state: psoriasis
SRX091697	SRR330859			tissue: skin psoriatic involveddisease state: psoriasis
SRX091698	SRR330860			tissue: skin psoriatic involveddisease state: psoriasis
SRX091699	SRR330861			tissue: skin psoriatic involveddisease state: psoriasis
SRX091700	SRR330862			tissue: skin psoriatic involveddisease state: psoriasis
SRX091701	SRR330863			tissue: skin psoriatic involveddisease state: psoriasis
SRX091702	SRR330864			tissue: skin psoriatic involveddisease state: psoriasis
SRX091703	SRR330865			tissue: skin psoriatic involveddisease state: psoriasis
SRX091704	SRR330866			tissue: skin psoriatic involveddisease state: psoriasis
SRX091705	SRR330867			tissue: skin psoriatic involveddisease state: psoriasis
SRX091706	SRR330868			tissue: skin psoriatic involveddisease state: psoriasis
SRX091707	SRR330869			tissue: skin psoriatic involveddisease state: psoriasis
SRX091708	SRR330870			tissue: skin psoriatic involveddisease state: psoriasis
SRX091709	SRR330871			tissue: skin psoriatic involveddisease state: psoriasis
SRX091710	SRR330872			tissue: skin psoriatic involveddisease state: psoriasis
SRX091711	SRR330873			tissue: skin psoriatic involveddisease state: psoriasis
SRX091712	SRR330874			tissue: skin psoriatic involveddisease state: psoriasis
SRX091713	SRR330875			tissue: skin psoriatic involveddisease state: psoriasis
SRX091714	SRR330876			tissue: skin psoriatic involveddisease state: psoriasis
SRX091715	SRR330877			tissue: skin psoriatic involveddisease state: psoriasis
SRX091716	SRR330878			tissue: skin psoriatic involveddisease state: psoriasis
SRX091717	SRR330879			tissue: skin psoriatic involveddisease state: psoriasis
SRX091718	SRR330880			tissue: skin psoriatic involveddisease state: psoriasis
SRX091719	SRR330881			tissue: skin psoriatic uninvolveddisease state: psoriasis
SRX091720	SRR330882			tissue: skin psoriatic uninvolveddisease state: psoriasis
SRX091721	SRR330883			tissue: skin psoriatic uninvolveddisease state: psoriasis
SRX091722	SRR330884			tissue: skin psoriatic uninvolveddisease state: psoriasis
SRX091723	SRR330885			tissue: skin psoriatic uninvolveddisease state: psoriasis
SRX091724	SRR330886			tissue: skin psoriatic uninvolveddisease state: psoriasis
SRX091725	SRR330887			tissue: skin psoriatic uninvolveddisease state: psoriasis
SRX091726	SRR330888			tissue: skin psoriatic uninvolveddisease state: psoriasis
SRX091727	SRR330889			tissue: skin psoriatic uninvolveddisease state: psoriasis
SRX091728	SRR330890			tissue: skin psoriatic uninvolveddisease state: psoriasis
SRX091729	SRR330891			tissue: skin psoriatic uninvolveddisease state: psoriasis
SRX091730	SRR330892			tissue: skin psoriatic uninvolveddisease state: psoriasis
SRX091731	SRR330893			tissue: skin psoriatic uninvolveddisease state: psoriasis
SRX091732	SRR330894			tissue: skin psoriatic uninvolveddisease state: psoriasis
SRX091733	SRR330895			tissue: skin psoriatic uninvolveddisease state: psoriasis
SRX091734	SRR330896			tissue: skin psoriatic uninvolveddisease state: psoriasis
SRX091735	SRR330897			tissue: skin psoriatic uninvolveddisease state: psoriasis
SRX091736	SRR330898			tissue: skin psoriatic uninvolveddisease state: psoriasis
SRX091737	SRR330899			tissue: skin psoriatic uninvolveddisease state: psoriasis
SRX091738	SRR330900			tissue: skin psoriatic uninvolveddisease state: psoriasis
SRX091739	SRR330901			tissue: skin psoriatic uninvolveddisease state: psoriasis
SRX091740	SRR330902			tissue: skin psoriatic uninvolveddisease state: psoriasis
SRX091741	SRR330903			tissue: skin psoriatic uninvolveddisease state: psoriasis
GSM714642	SRR189782	ago2		cell line: HEK293clip variant: CLIPenzymatic digestion: complete T1 digestionprotein: Ago2
GSM714643	SRR189783	ago2		cell line: HEK293clip variant: CLIPenzymatic digestion: complete T1 digestionprotein: Ago2
GSM714644	SRR189784	ago2		cell line: HEK293clip variant: PAR-CLIPenzymatic digestion: complete T1 digestionprotein: Ago2
GSM714645	SRR189785	ago2		cell line: HEK293clip variant: PAR-CLIPenzymatic digestion: complete T1 digestionprotein: Ago2
GSM714646	SRR189786	ago2		cell line: HEK293clip variant: PAR-CLIPenzymatic digestion: mild MNase digestionprotein: Ago2
GSM714647	SRR189787	ago2		cell line: HEK293clip variant: PAR-CLIPenzymatic digestion: mild MNase digestionprotein: Ago2
GSM796037	SRR343334	ago2		cell line: BC-1photoactivatable ribonucleoside and crosslinking wavelength: 4-SU / 365 nmantibody: Millipore anti-Ago2 clone 9E8.2immunoprecipitated protein: Ago2 (EIF2C2)
GSM796038	SRR343335	ago2		cell line: BC-1photoactivatable ribonucleoside and crosslinking wavelength: 4-SU / 365 nmantibody: Millipore anti-Ago2 clone 9E8.2immunoprecipitated protein: Ago2 (EIF2C2)
GSM796039	SRR343336	ago2		cell line: BC-3photoactivatable ribonucleoside and crosslinking wavelength: 4-SU / 365 nmantibody: Millipore anti-Ago2 clone 9E8.2immunoprecipitated protein: Ago2 (EIF2C2)
GSM796040	SRR343337	ago2		cell line: BC-3photoactivatable ribonucleoside and crosslinking wavelength: 4-SU / 365 nmantibody: Millipore anti-Ago2 clone 9E8.2immunoprecipitated protein: Ago2 (EIF2C2)
GSM402329	SRR029054			atcc number: HTB-22
GSM497064	SRR033719			b cell type: Activated B cell (Primary human)
GSM497059	SRR033714			b cell type: Burkitt Lymphoma (Daudi human Cell Line)
GSM497057	SRR033712			b cell type: Burkitt Lymphoma (Primary Human)
GSM497058	SRR033713			b cell type: Burkitt Lymphoma (Ramos Cell Line)
GSM497070	SRR033725			b cell type: Chronic lymphocytic leukemia (Primary human)
GSM497071	SRR033726			b cell type: Chronic lymphocytic Leukemia (Primary human)
GSM497077	SRR033732			b cell type: Diffuse Large B cell lymphoma (Bjab Cell Line)
GSM497066	SRR033721			b cell type: Diffuse Large B cell lymphoma (LY3 Cell Line)
GSM497056	SRR033711			b cell type: Diffuse Large B cell lymphoma (Primary Human)
GSM497065	SRR033720			b cell type: EBV-transformed B cell (primary human)
GSM380324	SRR015359			b cell type: Germinal Center (FACS sorted primary human)
GSM380328	SRR015363			b cell type: Germinal Center (FACS sorted primary human)
GSM497072	SRR033727			b cell type: HIV lymphoma (Primary human)
GSM497068	SRR033723			b cell type: Hodkgin lymphoma (L1236 human cell line)
GSM497069	SRR033724			b cell type: Hodkgin lymphoma (L428 human cell line)
GSM497075	SRR033730			b cell type: Lymphoblastic lymphoma (Primary human)
GSM497060	SRR033715			b cell type: Mantle cell Lymphoma (Mino cell line)
GSM497061	SRR033716			b cell type: Mantle cell lymphoma (Primary Human)
GSM497062	SRR033717			b cell type: Mantle cell Lymphoma (Primary Human)
GSM497073	SRR033728			b cell type: Marginal Zone lymphoma (Primary human)
GSM497074	SRR033729			b cell type: Marginal Zone lymphoma (Primary human)
GSM380326	SRR015361			b cell type: Memory (FACS sorted primary human)
GSM380330	SRR015365			b cell type: Memory (FACS sorted primary human)
GSM497076	SRR033731			b cell type: Multiple Myeloma (H929 human cell line)
GSM497067	SRR033722			b cell type: Multiple Myeloma (KMS12 human cell line)
GSM497063	SRR033718			b cell type: Multiple Myeloma (U266 human cell line)
GSM380323	SRR015358			b cell type: Naive (FACS sorted primary human)
GSM380327	SRR015362			b cell type: Naive (FACS sorted primary human)
GSM380325	SRR015360			b cell type: Plasma cell (FACS sorted primary human)
GSM380329	SRR015364			b cell type: Plasma cell (FACS sorted primary human)
GSM497055	SRR033710			b cell type: Transformed follicular lymphoma (Primary Human)
GSM416755	SRR029126			cell line: 143B
GSM416756	SRR029127			cell line: A549
GSM416759	SRR029130			cell line: DLD2
GSM541797	GSM541797			cell line: H1cell type: human embryonic stem cell (hESC)differentiation state: differentiated
GSM541796	GSM541796			cell line: H1cell type: human embryonic stem cell (hESC)differentiation state: undifferentiated
GSM416757	SRR029128			cell line: H520
GSM416733	GSM416733			cell line: HEK293
GSM416753	SRR029124			cell line: HeLa
GSM416760	SRR029131			cell line: MCF7
GSM416761	SRR029132			cell line: MDA231
GSM458537	SRR038854			cell line: primary giant congental nevus
GSM458535	SRR038852			cell line: primary melanoblast
GSM458536	SRR038853			cell line: primary melanocyte
GSM458541	SRR038858			cell line: primary uveal melanoma
GSM458538	SRR038855			cell line: secondary acral melanoma
GSM458540	SRR038857			cell line: secondary cutaneous melanoma
GSM458542	SRR038859			cell line: secondary cutaneous melanoma
GSM458543	SRR038860			cell line: secondary cutaneous melanoma
GSM458544	SRR038861			cell line: secondary cutaneous melanoma
GSM458546	SRR038863			cell line: secondary cutaneous melanoma
GSM458545	SRR038862			cell line: secondary cutaneous melanoma from a chronically sun-damaged body site
GSM458539	SRR038856			cell line: secondary mucosal melanoma
GSM416758	SRR029129			cell line: SW480
GSM518472	SRR039635			cell line: THP-1passages: 10 to 14
GSM518473	SRR039636			cell line: THP-1passages: 10 to 14
GSM518474	SRR039637			cell line: THP-1passages: 10 to 14
GSM416754	SRR029125			cell line: U2OS
GSM494812	SRR039193			cell type: Acute Promyelogenous Leukemia cell linecell line: HL60
GSM569185	SRR060981			cell type: centroblastsource tissue: tonsilgender: femaleage: 3 yearsisolation: fluorescence activated cell sorting
GSM569186	SRR060982			cell type: centrocytesource tissue: tonsilgender: femaleage: 3 yearsisolation: fluorescence activated cell sorting
GSM494811	SRR039192			cell type: Chronic Myelogenous Leukemia cell linecell line: K562
GSM522374	SRR037876			cell type: cultured fibroblastscoriell id: AG01522passage: 20
GSM569190	SRR060986			cell type: memory B cellsource tissue: tonsilgender: femaleage: 5 yearsisolation: fluorescence activated cell sorting
GSM569189	SRR060985			cell type: naive B cellsource tissue: tonsilgender: femaleage: 5 yearsisolation: fluorescence activated cell sorting
GSM565978	SRR060168			cell type: nasopharyngeal carcinoma cell linecell line: 5-8F
GSM565979	SRR060169			cell type: nasopharyngeal carcinoma cell linecell line: 5-8F
GSM494809	SRR039190			cell type: Peripheral blood mononuclear cells (PBMC)
GSM494810	SRR039191			cell type: Peripheral blood mononuclear cells (PBMC)
GSM569188	SRR060984			cell type: plasma cellsource tissue: tonsilgender: femaleage: 3 yearsisolation: fluorescence activated cell sorting
GSM569187	SRR060983			cell type: pre-germinal center B cellsource tissue: tonsilgender: femaleage: 3 yearsisolation: fluorescence activated cell sorting
GSM359173	GSM359173			cervix cc cell line
GSM359174	GSM359174			cervix cc cell line
GSM359175	GSM359175			cervix cc cell line
GSM359176	GSM359176			cervix cc cell line
GSM359177	GSM359177			cervix cc cell line
GSM359178	GSM359178			cervix cc cell line
GSM359179	GSM359179			cervix cc cell line
GSM359180	GSM359180			cervix cc cell line
GSM359181	GSM359181			cervix cc cell line
GSM359182	GSM359182			cervix cc cell line
GSM532876	GSM532876			diagnosis: adenocarcinomatissue: tumor
GSM532878	GSM532878			diagnosis: adenocarcinomatissue: tumor
GSM532880	GSM532880			diagnosis: adenocarcinomatissue: tumor
GSM532882	GSM532882			diagnosis: adenocarcinomatissue: tumor
GSM532888	GSM532888			diagnosis: adenocarcinomatissue: tumor
GSM532906	SRR040021			diagnosis: adenocarcinomatissue: tumor
GSM532912	SRR040027			diagnosis: adenocarcinomatissue: tumor
GSM532884	GSM532884			diagnosis: adenosquamous cell carcinomatissue: tumor
GSM532904	SRR040019			diagnosis: adenosquamous cell carcinomatissue: tumor
GSM532871	GSM532871			diagnosis: normaltissue: normal cervix
GSM532873	GSM532873			diagnosis: normaltissue: normal cervix
GSM532875	GSM532875			diagnosis: normaltissue: normal cervix
GSM532877	GSM532877			diagnosis: normaltissue: normal cervix
GSM532879	GSM532879			diagnosis: normaltissue: normal cervix
GSM532881	GSM532881			diagnosis: normaltissue: normal cervix
GSM532883	GSM532883			diagnosis: normaltissue: normal cervix
GSM532885	GSM532885			diagnosis: normaltissue: normal cervix
GSM532887	GSM532887			diagnosis: normaltissue: normal cervix
GSM532889	GSM532889			diagnosis: normaltissue: normal cervix
GSM532929	GSM532929			diagnosis: normaltissue: normal cervix
GSM532891	SRR040006			diagnosis: normaltissue: normal cervix
GSM532893	SRR040008			diagnosis: normaltissue: normal cervix
GSM532895	SRR040010			diagnosis: normaltissue: normal cervix
GSM532897	SRR040012			diagnosis: normaltissue: normal cervix
GSM532899	SRR040014			diagnosis: normaltissue: normal cervix
GSM532901	SRR040016			diagnosis: normaltissue: normal cervix
GSM532903	SRR040018			diagnosis: normaltissue: normal cervix
GSM532905	SRR040020			diagnosis: normaltissue: normal cervix
GSM532907	SRR040022			diagnosis: normaltissue: normal cervix
GSM532909	SRR040024			diagnosis: normaltissue: normal cervix
GSM532911	SRR040026			diagnosis: normaltissue: normal cervix
GSM532913	SRR040028			diagnosis: normaltissue: normal cervix
GSM532915	SRR040030			diagnosis: normaltissue: normal cervix
GSM532917	SRR040032			diagnosis: normaltissue: normal cervix
GSM532919	SRR040034			diagnosis: normaltissue: normal cervix
GSM532921	SRR040036			diagnosis: normaltissue: normal cervix
GSM532923	SRR040038			diagnosis: normaltissue: normal cervix
GSM532925	SRR040040			diagnosis: normaltissue: normal cervix
GSM532927	SRR040042			diagnosis: normaltissue: normal cervix
GSM532872	GSM532872			diagnosis: squamous cell carcinomatissue: tumor
GSM532874	GSM532874			diagnosis: squamous cell carcinomatissue: tumor
GSM532886	GSM532886			diagnosis: squamous cell carcinomatissue: tumor
GSM532890	GSM532890			diagnosis: squamous cell carcinomatissue: tumor
GSM532930	GSM532930			diagnosis: squamous cell carcinomatissue: tumor
GSM532892	SRR040007			diagnosis: squamous cell carcinomatissue: tumor
GSM532894	SRR040009			diagnosis: squamous cell carcinomatissue: tumor
GSM532896	SRR040011			diagnosis: squamous cell carcinomatissue: tumor
GSM532898	SRR040013			diagnosis: squamous cell carcinomatissue: tumor
GSM532900	SRR040015			diagnosis: squamous cell carcinomatissue: tumor
GSM532902	SRR040017			diagnosis: squamous cell carcinomatissue: tumor
GSM532908	SRR040023			diagnosis: squamous cell carcinomatissue: tumor
GSM532910	SRR040025			diagnosis: squamous cell carcinomatissue: tumor
GSM532914	SRR040029			diagnosis: squamous cell carcinomatissue: tumor
GSM532916	SRR040031			diagnosis: squamous cell carcinomatissue: tumor
GSM532918	SRR040033			diagnosis: squamous cell carcinomatissue: tumor
GSM532920	SRR040035			diagnosis: squamous cell carcinomatissue: tumor
GSM532922	SRR040037			diagnosis: squamous cell carcinomatissue: tumor
GSM532924	SRR040039			diagnosis: squamous cell carcinomatissue: tumor
GSM532926	SRR040041			diagnosis: squamous cell carcinomatissue: tumor
GSM532928	SRR040043			diagnosis: squamous cell carcinomatissue: tumor
GSM359183	GSM359183			liver carcinoma cell line
GSM359184	GSM359184			liver carcinoma cell line
GSM359185	GSM359185			liver carcinoma cell line
GSM359186	GSM359186			liver carcinoma cell line
GSM359187	GSM359187			liver carcinoma cell line
GSM359188	GSM359188			liver carcinoma cell line
GSM359189	GSM359189			liver carcinoma cell line
GSM359190	GSM359190			liver carcinoma cell line
GSM359191	GSM359191			liver carcinoma cell line
GSM359192	GSM359192			liver carcinoma cell line
GSM359193	GSM359193			liver carcinoma cell line
GSM359194	GSM359194			liver carcinoma cell line
GSM359195	GSM359195			liver carcinoma cell line
GSM359196	GSM359196			liver carcinoma cell line
GSM359197	GSM359197			liver carcinoma cell line
GSM359198	GSM359198			liver carcinoma cell line
GSM359199	GSM359199			liver carcinoma cell line
GSM359200	GSM359200			liver carcinoma cell line
GSM359201	GSM359201			liver carcinoma cell line
GSM359202	GSM359202			liver carcinoma cell line
GSM359203	GSM359203			liver carcinoma cell line
GSM359204	GSM359204			liver carcinoma cell line
GSM359205	GSM359205			liver carcinoma cell line
GSM359206	GSM359206			liver carcinoma cell line
GSM359207	GSM359207			liver carcinoma cell line
GSM359208	GSM359208			liver carcinoma cell line
GSM359209	GSM359209			liver carcinoma cell line
GSM359210	GSM359210			liver carcinoma cell line
GSM359211	GSM359211			liver carcinoma cell line
GSM359212	GSM359212			liver carcinoma cell line
GSM450601	GSM450601			sex: maleage: 19457 daystissue: superior frontal gyrus of the brainbatch: human batch 1
GSM450597	GSM450597			sex: maleage: 2 daytissue: superior frontal gyrus of the brainbatch: human batch 1
GSM450600	GSM450600			sex: maleage: 204 daystissue: superior frontal gyrus of the brainbatch: human batch 2
GSM450610	GSM450610			sex: maleage: 24090 daystissue: superior frontal gyrus of the brainbatch: human batch 2
GSM450599	GSM450599			sex: maleage: 2922 daystissue: superior frontal gyrus of the brainbatch: human batch 1
GSM450609	GSM450609			sex: maleage: 32120 daystissue: superior frontal gyrus of the brainbatch: human batch 2
GSM450598	GSM450598			sex: maleage: 34 daystissue: superior frontal gyrus of the brainbatch: human batch 1
GSM450606	GSM450606			sex: maleage: 34 daystissue: superior frontal gyrus of the brainbatch: human batch 2
GSM450603	GSM450603			sex: maleage: 35770 daystissue: superior frontal gyrus of the brainbatch: human batch 1
GSM450608	GSM450608			sex: maleage: 35770 daystissue: superior frontal gyrus of the brainbatch: human batch 2
GSM450607	GSM450607			sex: maleage: 4 daystissue: superior frontal gyrus of the brainbatch: human batch 2
GSM450605	GSM450605			sex: maleage: 5105 daystissue: superior frontal gyrus of the brainbatch: human batch 2
GSM450602	GSM450602			sex: maleage: 9277 daystissue: superior frontal gyrus of the brainbatch: human batch 1
GSM450604	GSM450604			sex: maleage: Age 29200 daystissue: superior frontal gyrus of the brainbatch: human batch 1
GSM721075	SRR207113	ago1/2		sirna treatment: controlimmunoprecipitation: AGO1&amp;amp;AGO2rna size range &amp;amp; source: 18-30nt/whole cell
GSM721073	SRR207111			sirna treatment: controlimmunoprecipitation: nonerna size range &amp;amp; source: 18-30nt/whole cell
GSM721079	SRR207117			sirna treatment: controlimmunoprecipitation: nonerna size range &amp;amp; source: 30-100nt/whole cell
GSM721072	SRR207110			sirna treatment: noneimmunoprecipitation: nonerna size range &amp;amp; source: 12-20nt/nuclear
GSM721078	SRR207116			sirna treatment: noneimmunoprecipitation: nonerna size range &amp;amp; source: 18-30nt/nuclear
GSM721076	SRR207114	ago1/2	rrp40	sirna treatment: RRP40immunoprecipitation: AGO1&amp;amp;AGO2rna size range &amp;amp; source: 18-30nt/whole cell
GSM721074	SRR207112	rrp40		sirna treatment: RRP40immunoprecipitation: nonerna size range &amp;amp; source: 18-30nt/whole cell
GSM721080	SRR207118	rrp40		sirna treatment: RRP40immunoprecipitation: nonerna size range &amp;amp; source: 30-100nt/whole cell
GSM721077	SRR207115	xrn1/xrn2		sirna treatment: XRN1&amp;amp;XRN2immunoprecipitation: nonerna size range &amp;amp; source: 18-30nt/whole cell
GSM721081	SRR207119	xrn1/xrn2		sirna treatment: XRN1&amp;amp;XRN2immunoprecipitation: nonerna size range &amp;amp; source: 30-100nt/whole cell
GSM339994	GSM339994			small RNA cloning
GSM339995	GSM339995			small RNA cloning
GSM339996	GSM339996			small RNA cloning
SRR015446	SRR015446			smallRNAs high-throughput sequencing Total
SRR015447	SRR015447			smallRNAs high-throughput sequencing Total
SRR015448	SRR015448			smallRNAs high-throughput sequencing Total
GSM715534	SRR191424			tissue: Breastdisease status: AdenoidID: 138
GSM715544	SRR191434			tissue: Breastdisease status: AdenoidID: 171
GSM715579	SRR191469			tissue: Breastdisease status: ApocrineID: 117
GSM715536	SRR191426			tissue: Breastdisease status: ApocrineID: 149
GSM715538	SRR191428			tissue: Breastdisease status: ApocrineID: 160
GSM715543	SRR191433			tissue: Breastdisease status: ApocrineID: 170
GSM715597	SRR191487			tissue: Breastdisease status: Atypical MedullaryID: 126A
GSM715654	SRR191544			tissue: Breastdisease status: Atypical MedullaryID: 126B
GSM715637	SRR191527			tissue: Breastdisease status: Atypical MedullaryID: 128
GSM715639	SRR191529			tissue: Breastdisease status: Atypical MedullaryID: 131
GSM715641	SRR191531			tissue: Breastdisease status: Atypical MedullaryID: 134
GSM715642	SRR191532			tissue: Breastdisease status: Atypical MedullaryID: 135
GSM715533	SRR191423			tissue: Breastdisease status: Atypical MedullaryID: 137
GSM715535	SRR191425			tissue: Breastdisease status: Atypical MedullaryID: 141
GSM715652	SRR191542			tissue: Breastdisease status: Atypical MedullaryID: 64
GSM715717	SRR191607			tissue: Breastdisease status: Cell LineID: 192Aesr/er ihc (1=positive, 0=negative): 1pgr/pr ihc (1=positive, 0=negative): 1erbb2 ihc (1=positive, 0=negative): 1
GSM715718	SRR191608			tissue: Breastdisease status: Cell LineID: 193A
GSM715719	SRR191609			tissue: Breastdisease status: Cell LineID: 194A
GSM715720	SRR191610			tissue: Breastdisease status: Cell LineID: 195Aesr/er ihc (1=positive, 0=negative): 1pgr/pr ihc (1=positive, 0=negative): 1
GSM715665	SRR191555			tissue: Breastdisease status: Cell LineID: 195Besr/er ihc (1=positive, 0=negative): 1pgr/pr ihc (1=positive, 0=negative): 1
GSM715695	SRR191585			tissue: Breastdisease status: Cell LineID: 196esr/er ihc (1=positive, 0=negative): 1
GSM715696	SRR191586			tissue: Breastdisease status: Cell LineID: 197esr/er ihc (1=positive, 0=negative): 1
GSM715613	SRR191503			tissue: Breastdisease status: DCISID: 10esr/er ihc (1=positive, 0=negative): NApgr/pr ihc (1=positive, 0=negative): NAerbb2 ihc (1=positive, 0=negative): 1
GSM715593	SRR191483			tissue: Breastdisease status: DCISID: 11erbb2 ihc (1=positive, 0=negative): 1
GSM715594	SRR191484			tissue: Breastdisease status: DCISID: 12esr/er ihc (1=positive, 0=negative): 1erbb2 ihc (1=positive, 0=negative): 1
GSM715598	SRR191488			tissue: Breastdisease status: DCISID: 14esr/er ihc (1=positive, 0=negative): NApgr/pr ihc (1=positive, 0=negative): NAerbb2 ihc (1=positive, 0=negative): 1
GSM715600	SRR191490			tissue: Breastdisease status: DCISID: 15esr/er ihc (1=positive, 0=negative): NApgr/pr ihc (1=positive, 0=negative): NAerbb2 ihc (1=positive, 0=negative): 1
GSM715584	SRR191474			tissue: Breastdisease status: DCISID: 16Aesr/er ihc (1=positive, 0=negative): 1pgr/pr ihc (1=positive, 0=negative): 1erbb2 ihc (1=positive, 0=negative): 1
GSM715731	SRR191621			tissue: Breastdisease status: DCISID: 16Besr/er ihc (1=positive, 0=negative): 1pgr/pr ihc (1=positive, 0=negative): 1erbb2 ihc (1=positive, 0=negative): 1
GSM715607	SRR191497			tissue: Breastdisease status: DCISID: 17erbb2 ihc (1=positive, 0=negative): 1
GSM715585	SRR191475			tissue: Breastdisease status: DCISID: 18Aerbb2 ihc (1=positive, 0=negative): 1
GSM715733	SRR191623			tissue: Breastdisease status: DCISID: 18Berbb2 ihc (1=positive, 0=negative): 1
GSM715572	SRR191462			tissue: Breastdisease status: DCISID: 1erbb2 ihc (1=positive, 0=negative): 1
GSM715587	SRR191477			tissue: Breastdisease status: DCISID: 2erbb2 ihc (1=positive, 0=negative): 1
GSM715608	SRR191498			tissue: Breastdisease status: DCISID: 3erbb2 ihc (1=positive, 0=negative): 1
GSM715625	SRR191515			tissue: Breastdisease status: DCISID: 4erbb2 ihc (1=positive, 0=negative): 1
GSM715592	SRR191482			tissue: Breastdisease status: DCISID: 5Aesr/er ihc (1=positive, 0=negative): 1pgr/pr ihc (1=positive, 0=negative): 1erbb2 ihc (1=positive, 0=negative): 1
GSM715739	SRR191629			tissue: Breastdisease status: DCISID: 5Besr/er ihc (1=positive, 0=negative): 1pgr/pr ihc (1=positive, 0=negative): 1erbb2 ihc (1=positive, 0=negative): 1
GSM715609	SRR191499			tissue: Breastdisease status: DCISID: 6erbb2 ihc (1=positive, 0=negative): 1
GSM715610	SRR191500			tissue: Breastdisease status: DCISID: 7erbb2 ihc (1=positive, 0=negative): 1
GSM715611	SRR191501			tissue: Breastdisease status: DCISID: 8erbb2 ihc (1=positive, 0=negative): 1
GSM715612	SRR191502			tissue: Breastdisease status: DCISID: 9Aerbb2 ihc (1=positive, 0=negative): 1
GSM715745	SRR191635			tissue: Breastdisease status: DCISID: 9Berbb2 ihc (1=positive, 0=negative): 1
GSM715551	SRR191441			tissue: Breastdisease status: IDCID: 106
GSM715552	SRR191442			tissue: Breastdisease status: IDCID: 107A
GSM715633	SRR191523			tissue: Breastdisease status: IDCID: 107B
GSM715553	SRR191443			tissue: Breastdisease status: IDCID: 108
GSM715554	SRR191444			tissue: Breastdisease status: IDCID: 109
GSM715555	SRR191445			tissue: Breastdisease status: IDCID: 110
GSM715573	SRR191463			tissue: Breastdisease status: IDCID: 111
GSM715574	SRR191464			tissue: Breastdisease status: IDCID: 112
GSM715575	SRR191465			tissue: Breastdisease status: IDCID: 113
GSM715576	SRR191466			tissue: Breastdisease status: IDCID: 114
GSM715577	SRR191467			tissue: Breastdisease status: IDCID: 115
GSM715578	SRR191468			tissue: Breastdisease status: IDCID: 116
GSM715580	SRR191470			tissue: Breastdisease status: IDCID: 118
GSM715581	SRR191471			tissue: Breastdisease status: IDCID: 119A
GSM715634	SRR191524			tissue: Breastdisease status: IDCID: 119B
GSM715582	SRR191472			tissue: Breastdisease status: IDCID: 120
GSM715583	SRR191473			tissue: Breastdisease status: IDCID: 121A
GSM715635	SRR191525			tissue: Breastdisease status: IDCID: 121B
GSM715595	SRR191485			tissue: Breastdisease status: IDCID: 123
GSM715653	SRR191543			tissue: Breastdisease status: IDCID: 124A
GSM715614	SRR191504			tissue: Breastdisease status: IDCID: 124B
GSM715596	SRR191486			tissue: Breastdisease status: IDCID: 125erbb2 ihc (1=positive, 0=negative): 1
GSM715655	SRR191545			tissue: Breastdisease status: IDCID: 139A
GSM715615	SRR191505			tissue: Breastdisease status: IDCID: 139B
GSM715556	SRR191446			tissue: Breastdisease status: IDCID: 140erbb2 ihc (1=positive, 0=negative): 1
GSM715557	SRR191447			tissue: Breastdisease status: IDCID: 142esr/er ihc (1=positive, 0=negative): 1erbb2 ihc (1=positive, 0=negative): 1
GSM715558	SRR191448			tissue: Breastdisease status: IDCID: 143erbb2 ihc (1=positive, 0=negative): 1
GSM715559	SRR191449			tissue: Breastdisease status: IDCID: 144erbb2 ihc (1=positive, 0=negative): 1
GSM715560	SRR191450			tissue: Breastdisease status: IDCID: 145erbb2 ihc (1=positive, 0=negative): 1
GSM715616	SRR191506			tissue: Breastdisease status: IDCID: 146
GSM715599	SRR191489			tissue: Breastdisease status: IDCID: 147
GSM715617	SRR191507			tissue: Breastdisease status: IDCID: 148A
GSM715728	SRR191618			tissue: Breastdisease status: IDCID: 148B
GSM715601	SRR191491			tissue: Breastdisease status: IDCID: 150
GSM715656	SRR191546			tissue: Breastdisease status: IDCID: 152A
GSM715618	SRR191508			tissue: Breastdisease status: IDCID: 152B
GSM715537	SRR191427			tissue: Breastdisease status: IDCID: 153A
GSM715644	SRR191534			tissue: Breastdisease status: IDCID: 153B
GSM715602	SRR191492			tissue: Breastdisease status: IDCID: 154
GSM715657	SRR191547			tissue: Breastdisease status: IDCID: 155A
GSM715603	SRR191493			tissue: Breastdisease status: IDCID: 155B
GSM715619	SRR191509			tissue: Breastdisease status: IDCID: 156
GSM715604	SRR191494			tissue: Breastdisease status: IDCID: 157
GSM715620	SRR191510			tissue: Breastdisease status: IDCID: 158
GSM715605	SRR191495			tissue: Breastdisease status: IDCID: 159
GSM715621	SRR191511			tissue: Breastdisease status: IDCID: 161
GSM715606	SRR191496			tissue: Breastdisease status: IDCID: 162
GSM715622	SRR191512			tissue: Breastdisease status: IDCID: 163
GSM715623	SRR191513			tissue: Breastdisease status: IDCID: 164
GSM715624	SRR191514			tissue: Breastdisease status: IDCID: 165
GSM715540	SRR191430			tissue: Breastdisease status: IDCID: 167A
GSM715730	SRR191620			tissue: Breastdisease status: IDCID: 167B
GSM715541	SRR191431			tissue: Breastdisease status: IDCID: 168
GSM715542	SRR191432			tissue: Breastdisease status: IDCID: 169
GSM715545	SRR191435			tissue: Breastdisease status: IDCID: 172
GSM715546	SRR191436			tissue: Breastdisease status: IDCID: 173
GSM715548	SRR191438			tissue: Breastdisease status: IDCID: 175A
GSM715732	SRR191622			tissue: Breastdisease status: IDCID: 175B
GSM715549	SRR191439			tissue: Breastdisease status: IDCID: 176
GSM715561	SRR191451			tissue: Breastdisease status: IDCID: 177
GSM715562	SRR191452			tissue: Breastdisease status: IDCID: 178
GSM715563	SRR191453			tissue: Breastdisease status: IDCID: 179
GSM715564	SRR191454			tissue: Breastdisease status: IDCID: 180
GSM715565	SRR191455			tissue: Breastdisease status: IDCID: 181A
GSM715645	SRR191535			tissue: Breastdisease status: IDCID: 181B
GSM715566	SRR191456			tissue: Breastdisease status: IDCID: 182
GSM715519	SRR191409			tissue: Breastdisease status: IDCID: 19Aesr/er ihc (1=positive, 0=negative): 1pgr/pr ihc (1=positive, 0=negative): 1
GSM715586	SRR191476			tissue: Breastdisease status: IDCID: 19Besr/er ihc (1=positive, 0=negative): 1pgr/pr ihc (1=positive, 0=negative): 1
GSM715520	SRR191410			tissue: Breastdisease status: IDCID: 20esr/er ihc (1=positive, 0=negative): 1
GSM715521	SRR191411			tissue: Breastdisease status: IDCID: 21esr/er ihc (1=positive, 0=negative): 1pgr/pr ihc (1=positive, 0=negative): 1erbb2 ihc (1=positive, 0=negative): 1
GSM715503	SRR191393			tissue: Breastdisease status: IDCID: 22esr/er ihc (1=positive, 0=negative): 1
GSM715504	SRR191394			tissue: Breastdisease status: IDCID: 23esr/er ihc (1=positive, 0=negative): 1
GSM715522	SRR191412			tissue: Breastdisease status: IDCID: 24esr/er ihc (1=positive, 0=negative): 1
GSM715505	SRR191395			tissue: Breastdisease status: IDCID: 25esr/er ihc (1=positive, 0=negative): 1pgr/pr ihc (1=positive, 0=negative): 1erbb2 ihc (1=positive, 0=negative): 1
GSM715660	SRR191550			tissue: Breastdisease status: IDCID: 27Aesr/er ihc (1=positive, 0=negative): 1pgr/pr ihc (1=positive, 0=negative): 1erbb2 ihc (1=positive, 0=negative): 1
GSM715567	SRR191457			tissue: Breastdisease status: IDCID: 27Besr/er ihc (1=positive, 0=negative): 1pgr/pr ihc (1=positive, 0=negative): 1erbb2 ihc (1=positive, 0=negative): 1
GSM715523	SRR191413			tissue: Breastdisease status: IDCID: 28Aesr/er ihc (1=positive, 0=negative): 1pgr/pr ihc (1=positive, 0=negative): 1erbb2 ihc (1=positive, 0=negative): 1
GSM715568	SRR191458			tissue: Breastdisease status: IDCID: 28Besr/er ihc (1=positive, 0=negative): 1pgr/pr ihc (1=positive, 0=negative): 1erbb2 ihc (1=positive, 0=negative): 1
GSM715506	SRR191396			tissue: Breastdisease status: IDCID: 29esr/er ihc (1=positive, 0=negative): 1
GSM715507	SRR191397			tissue: Breastdisease status: IDCID: 30Aesr/er ihc (1=positive, 0=negative): 1pgr/pr ihc (1=positive, 0=negative): 1
GSM715588	SRR191478			tissue: Breastdisease status: IDCID: 30Besr/er ihc (1=positive, 0=negative): 1pgr/pr ihc (1=positive, 0=negative): 1
GSM715524	SRR191414			tissue: Breastdisease status: IDCID: 31Aesr/er ihc (1=positive, 0=negative): 1pgr/pr ihc (1=positive, 0=negative): 1
GSM715589	SRR191479			tissue: Breastdisease status: IDCID: 31Besr/er ihc (1=positive, 0=negative): 1pgr/pr ihc (1=positive, 0=negative): 1
GSM715734	SRR191624			tissue: Breastdisease status: IDCID: 31Cesr/er ihc (1=positive, 0=negative): 1pgr/pr ihc (1=positive, 0=negative): 1
GSM715661	SRR191551			tissue: Breastdisease status: IDCID: 32Aesr/er ihc (1=positive, 0=negative): 1pgr/pr ihc (1=positive, 0=negative): 1
GSM715569	SRR191459			tissue: Breastdisease status: IDCID: 32Besr/er ihc (1=positive, 0=negative): 1pgr/pr ihc (1=positive, 0=negative): 1
GSM715735	SRR191625			tissue: Breastdisease status: IDCID: 32Cesr/er ihc (1=positive, 0=negative): 1pgr/pr ihc (1=positive, 0=negative): 1
GSM715525	SRR191415			tissue: Breastdisease status: IDCID: 33Aesr/er ihc (1=positive, 0=negative): 1pgr/pr ihc (1=positive, 0=negative): 1
GSM715570	SRR191460			tissue: Breastdisease status: IDCID: 33Besr/er ihc (1=positive, 0=negative): 1pgr/pr ihc (1=positive, 0=negative): 1
GSM715526	SRR191416			tissue: Breastdisease status: IDCID: 34esr/er ihc (1=positive, 0=negative): 1pgr/pr ihc (1=positive, 0=negative): 1
GSM715571	SRR191461			tissue: Breastdisease status: IDCID: 35Aesr/er ihc (1=positive, 0=negative): 1pgr/pr ihc (1=positive, 0=negative): 1
GSM715508	SRR191398			tissue: Breastdisease status: IDCID: 35Besr/er ihc (1=positive, 0=negative): 1pgr/pr ihc (1=positive, 0=negative): 1
GSM715509	SRR191399			tissue: Breastdisease status: IDCID: 36Aesr/er ihc (1=positive, 0=negative): 1pgr/pr ihc (1=positive, 0=negative): 1
GSM715736	SRR191626			tissue: Breastdisease status: IDCID: 36Besr/er ihc (1=positive, 0=negative): 1pgr/pr ihc (1=positive, 0=negative): 1
GSM715510	SRR191400			tissue: Breastdisease status: IDCID: 37esr/er ihc (1=positive, 0=negative): 1pgr/pr ihc (1=positive, 0=negative): 1
GSM715511	SRR191401			tissue: Breastdisease status: IDCID: 38Aesr/er ihc (1=positive, 0=negative): 1
GSM715590	SRR191480			tissue: Breastdisease status: IDCID: 38Besr/er ihc (1=positive, 0=negative): 1
GSM715527	SRR191417			tissue: Breastdisease status: IDCID: 39esr/er ihc (1=positive, 0=negative): 1
GSM715529	SRR191419			tissue: Breastdisease status: IDCID: 41esr/er ihc (1=positive, 0=negative): 1pgr/pr ihc (1=positive, 0=negative): 1erbb2 ihc (1=positive, 0=negative): 1
GSM715662	SRR191552			tissue: Breastdisease status: IDCID: 42esr/er ihc (1=positive, 0=negative): 1pgr/pr ihc (1=positive, 0=negative): 1
GSM715512	SRR191402			tissue: Breastdisease status: IDCID: 43Aesr/er ihc (1=positive, 0=negative): 1
GSM715591	SRR191481			tissue: Breastdisease status: IDCID: 43Besr/er ihc (1=positive, 0=negative): 1
GSM715513	SRR191403			tissue: Breastdisease status: IDCID: 44esr/er ihc (1=positive, 0=negative): 1pgr/pr ihc (1=positive, 0=negative): 1
GSM715666	SRR191556			tissue: Breastdisease status: IDCID: 45Aesr/er ihc (1=positive, 0=negative): 1pgr/pr ihc (1=positive, 0=negative): 1erbb2 ihc (1=positive, 0=negative): 1
GSM715647	SRR191537			tissue: Breastdisease status: IDCID: 45Besr/er ihc (1=positive, 0=negative): 1pgr/pr ihc (1=positive, 0=negative): 1erbb2 ihc (1=positive, 0=negative): 1
GSM715737	SRR191627			tissue: Breastdisease status: IDCID: 45Cesr/er ihc (1=positive, 0=negative): 1pgr/pr ihc (1=positive, 0=negative): 1erbb2 ihc (1=positive, 0=negative): 1
GSM715677	SRR191567			tissue: Breastdisease status: IDCID: 46erbb2 ihc (1=positive, 0=negative): 1
GSM715514	SRR191404			tissue: Breastdisease status: IDCID: 47Aesr/er ihc (1=positive, 0=negative): 1pgr/pr ihc (1=positive, 0=negative): 1erbb2 ihc (1=positive, 0=negative): 1
GSM715700	SRR191590			tissue: Breastdisease status: IDCID: 48esr/er ihc (1=positive, 0=negative): 1pgr/pr ihc (1=positive, 0=negative): 1erbb2 ihc (1=positive, 0=negative): 1
GSM715648	SRR191538			tissue: Breastdisease status: IDCID: 49esr/er ihc (1=positive, 0=negative): 1pgr/pr ihc (1=positive, 0=negative): 1erbb2 ihc (1=positive, 0=negative): 1
GSM715697	SRR191587			tissue: Breastdisease status: IDCID: 50Aesr/er ihc (1=positive, 0=negative): 1erbb2 ihc (1=positive, 0=negative): 1
GSM715678	SRR191568			tissue: Breastdisease status: IDCID: 51esr/er ihc (1=positive, 0=negative): 1pgr/pr ihc (1=positive, 0=negative): 1erbb2 ihc (1=positive, 0=negative): 1
GSM715698	SRR191588			tissue: Breastdisease status: IDCID: 52Aerbb2 ihc (1=positive, 0=negative): 1
GSM715738	SRR191628			tissue: Breastdisease status: IDCID: 52Berbb2 ihc (1=positive, 0=negative): 1
GSM715701	SRR191591			tissue: Breastdisease status: IDCID: 53esr/er ihc (1=positive, 0=negative): 1pgr/pr ihc (1=positive, 0=negative): 1erbb2 ihc (1=positive, 0=negative): 1
GSM715679	SRR191569			tissue: Breastdisease status: IDCID: 54esr/er ihc (1=positive, 0=negative): 1erbb2 ihc (1=positive, 0=negative): 1
GSM715515	SRR191405			tissue: Breastdisease status: IDCID: 55Aesr/er ihc (1=positive, 0=negative): 1erbb2 ihc (1=positive, 0=negative): 1
GSM715680	SRR191570			tissue: Breastdisease status: IDCID: 56erbb2 ihc (1=positive, 0=negative): 1
GSM715667	SRR191557			tissue: Breastdisease status: IDCID: 57Aerbb2 ihc (1=positive, 0=negative): 1
GSM715721	SRR191611			tissue: Breastdisease status: IDCID: 57Berbb2 ihc (1=positive, 0=negative): 1
GSM715711	SRR191601			tissue: Breastdisease status: IDCID: 58erbb2 ihc (1=positive, 0=negative): 1
GSM715702	SRR191592			tissue: Breastdisease status: IDCID: 59erbb2 ihc (1=positive, 0=negative): 1
GSM715712	SRR191602			tissue: Breastdisease status: IDCID: 60esr/er ihc (1=positive, 0=negative): 1pgr/pr ihc (1=positive, 0=negative): 1erbb2 ihc (1=positive, 0=negative): 1
GSM715668	SRR191558			tissue: Breastdisease status: IDCID: 61Aesr/er ihc (1=positive, 0=negative): 1erbb2 ihc (1=positive, 0=negative): 1
GSM715649	SRR191539			tissue: Breastdisease status: IDCID: 61Besr/er ihc (1=positive, 0=negative): 1erbb2 ihc (1=positive, 0=negative): 1
GSM715703	SRR191593			tissue: Breastdisease status: IDCID: 62Aesr/er ihc (1=positive, 0=negative): 1pgr/pr ihc (1=positive, 0=negative): 1erbb2 ihc (1=positive, 0=negative): 1
GSM715650	SRR191540			tissue: Breastdisease status: IDCID: 62Besr/er ihc (1=positive, 0=negative): 1pgr/pr ihc (1=positive, 0=negative): 1erbb2 ihc (1=positive, 0=negative): 1
GSM715681	SRR191571			tissue: Breastdisease status: IDCID: 63Aerbb2 ihc (1=positive, 0=negative): 1
GSM715651	SRR191541			tissue: Breastdisease status: IDCID: 63Berbb2 ihc (1=positive, 0=negative): 1
GSM715669	SRR191559			tissue: Breastdisease status: IDCID: 65Aerbb2 ihc (1=positive, 0=negative): 1
GSM715722	SRR191612			tissue: Breastdisease status: IDCID: 65Berbb2 ihc (1=positive, 0=negative): 1
GSM715682	SRR191572			tissue: Breastdisease status: IDCID: 66Aerbb2 ihc (1=positive, 0=negative): 1
GSM715626	SRR191516			tissue: Breastdisease status: IDCID: 66Berbb2 ihc (1=positive, 0=negative): 1
GSM715723	SRR191613			tissue: Breastdisease status: IDCID: 66Cerbb2 ihc (1=positive, 0=negative): 1
GSM715516	SRR191406			tissue: Breastdisease status: IDCID: 67esr/er ihc (1=positive, 0=negative): 1pgr/pr ihc (1=positive, 0=negative): 1erbb2 ihc (1=positive, 0=negative): 1
GSM715683	SRR191573			tissue: Breastdisease status: IDCID: 68esr/er ihc (1=positive, 0=negative): 1erbb2 ihc (1=positive, 0=negative): 1
GSM715699	SRR191589			tissue: Breastdisease status: IDCID: 69Aerbb2 ihc (1=positive, 0=negative): 1
GSM715704	SRR191594			tissue: Breastdisease status: IDCID: 70Aesr/er ihc (1=positive, 0=negative): 1erbb2 ihc (1=positive, 0=negative): 1
GSM715740	SRR191630			tissue: Breastdisease status: IDCID: 70Besr/er ihc (1=positive, 0=negative): 1erbb2 ihc (1=positive, 0=negative): 1
GSM715713	SRR191603			tissue: Breastdisease status: IDCID: 71erbb2 ihc (1=positive, 0=negative): 1
GSM715705	SRR191595			tissue: Breastdisease status: IDCID: 72erbb2 ihc (1=positive, 0=negative): 1
GSM715706	SRR191596			tissue: Breastdisease status: IDCID: 73erbb2 ihc (1=positive, 0=negative): 1
GSM715714	SRR191604			tissue: Breastdisease status: IDCID: 74erbb2 ihc (1=positive, 0=negative): 1
GSM715707	SRR191597			tissue: Breastdisease status: IDCID: 75Apgr/pr ihc (1=positive, 0=negative): 1erbb2 ihc (1=positive, 0=negative): 1
GSM715627	SRR191517			tissue: Breastdisease status: IDCID: 75Bpgr/pr ihc (1=positive, 0=negative): 1erbb2 ihc (1=positive, 0=negative): 1
GSM715741	SRR191631			tissue: Breastdisease status: IDCID: 75Cpgr/pr ihc (1=positive, 0=negative): 1erbb2 ihc (1=positive, 0=negative): 1
GSM715715	SRR191605			tissue: Breastdisease status: IDCID: 76erbb2 ihc (1=positive, 0=negative): 1
GSM715670	SRR191560			tissue: Breastdisease status: IDCID: 77erbb2 ihc (1=positive, 0=negative): 1
GSM715684	SRR191574			tissue: Breastdisease status: IDCID: 78Aerbb2 ihc (1=positive, 0=negative): 1
GSM715742	SRR191632			tissue: Breastdisease status: IDCID: 78Berbb2 ihc (1=positive, 0=negative): 1
GSM715708	SRR191598			tissue: Breastdisease status: IDCID: 79erbb2 ihc (1=positive, 0=negative): 1
GSM715671	SRR191561			tissue: Breastdisease status: IDCID: 80esr/er ihc (1=positive, 0=negative): 1pgr/pr ihc (1=positive, 0=negative): 1erbb2 ihc (1=positive, 0=negative): 1
GSM715517	SRR191407			tissue: Breastdisease status: IDCID: 81Aerbb2 ihc (1=positive, 0=negative): 1
GSM715672	SRR191562			tissue: Breastdisease status: IDCID: 82erbb2 ihc (1=positive, 0=negative): 1
GSM715673	SRR191563			tissue: Breastdisease status: IDCID: 83Aerbb2 ihc (1=positive, 0=negative): 1
GSM715628	SRR191518			tissue: Breastdisease status: IDCID: 83Berbb2 ihc (1=positive, 0=negative): 1
GSM715716	SRR191606			tissue: Breastdisease status: IDCID: 84esr/er ihc (1=positive, 0=negative): 1pgr/pr ihc (1=positive, 0=negative): 1erbb2 ihc (1=positive, 0=negative): 1
GSM715685	SRR191575			tissue: Breastdisease status: IDCID: 85Aerbb2 ihc (1=positive, 0=negative): 1
GSM715743	SRR191633			tissue: Breastdisease status: IDCID: 85Berbb2 ihc (1=positive, 0=negative): 1
GSM715686	SRR191576			tissue: Breastdisease status: IDCID: 86Aerbb2 ihc (1=positive, 0=negative): 1
GSM715629	SRR191519			tissue: Breastdisease status: IDCID: 86Berbb2 ihc (1=positive, 0=negative): 1
GSM715674	SRR191564			tissue: Breastdisease status: IDCID: 87erbb2 ihc (1=positive, 0=negative): 1
GSM715518	SRR191408			tissue: Breastdisease status: IDCID: 88Aerbb2 ihc (1=positive, 0=negative): 1
GSM715709	SRR191599			tissue: Breastdisease status: IDCID: 89Aerbb2 ihc (1=positive, 0=negative): 1
GSM715630	SRR191520			tissue: Breastdisease status: IDCID: 89Berbb2 ihc (1=positive, 0=negative): 1
GSM715710	SRR191600			tissue: Breastdisease status: IDCID: 90erbb2 ihc (1=positive, 0=negative): 1
GSM715675	SRR191565			tissue: Breastdisease status: IDCID: 92Aesr/er ihc (1=positive, 0=negative): 1pgr/pr ihc (1=positive, 0=negative): 1erbb2 ihc (1=positive, 0=negative): 1
GSM715631	SRR191521			tissue: Breastdisease status: IDCID: 92Besr/er ihc (1=positive, 0=negative): 1pgr/pr ihc (1=positive, 0=negative): 1erbb2 ihc (1=positive, 0=negative): 1
GSM715724	SRR191614			tissue: Breastdisease status: IDCID: 92Cesr/er ihc (1=positive, 0=negative): 1pgr/pr ihc (1=positive, 0=negative): 1erbb2 ihc (1=positive, 0=negative): 1
GSM715687	SRR191577			tissue: Breastdisease status: IDCID: 93Aerbb2 ihc (1=positive, 0=negative): 1
GSM715632	SRR191522			tissue: Breastdisease status: IDCID: 93Berbb2 ihc (1=positive, 0=negative): 1
GSM715676	SRR191566			tissue: Breastdisease status: IDCID: 94Aesr/er ihc (1=positive, 0=negative): 1pgr/pr ihc (1=positive, 0=negative): 1erbb2 ihc (1=positive, 0=negative): 1
GSM715725	SRR191615			tissue: Breastdisease status: IDCID: 94Besr/er ihc (1=positive, 0=negative): 1pgr/pr ihc (1=positive, 0=negative): 1erbb2 ihc (1=positive, 0=negative): 1
GSM715528	SRR191418			tissue: Breastdisease status: ILCID: 40esr/er ihc (1=positive, 0=negative): 1pgr/pr ihc (1=positive, 0=negative): 1
GSM715530	SRR191420			tissue: Breastdisease status: MetaplasticID: 122A
GSM715531	SRR191421			tissue: Breastdisease status: MetaplasticID: 122B
GSM715636	SRR191526			tissue: Breastdisease status: MetaplasticID: 127
GSM715532	SRR191422			tissue: Breastdisease status: MetaplasticID: 129
GSM715638	SRR191528			tissue: Breastdisease status: MetaplasticID: 130
GSM715640	SRR191530			tissue: Breastdisease status: MetaplasticID: 132
GSM715643	SRR191533			tissue: Breastdisease status: MetaplasticID: 136
GSM715539	SRR191429			tissue: Breastdisease status: MetaplasticID: 166A
GSM715729	SRR191619			tissue: Breastdisease status: MetaplasticID: 166B
GSM715547	SRR191437			tissue: Breastdisease status: MetaplasticID: 174
GSM715646	SRR191536			tissue: Breastdisease status: MetaplasticID: 183
GSM715550	SRR191440			tissue: Breastdisease status: Mucinous AID: 26esr/er ihc (1=positive, 0=negative): 1pgr/pr ihc (1=positive, 0=negative): 1
GSM715688	SRR191578			tissue: Breastdisease status: NormalID: 100Aesr/er ihc (1=positive, 0=negative): NApgr/pr ihc (1=positive, 0=negative): NAerbb2 ihc (1=positive, 0=negative): NA
GSM715658	SRR191548			tissue: Breastdisease status: NormalID: 101esr/er ihc (1=positive, 0=negative): NApgr/pr ihc (1=positive, 0=negative): NAerbb2 ihc (1=positive, 0=negative): NA
GSM715689	SRR191579			tissue: Breastdisease status: NormalID: 102Aesr/er ihc (1=positive, 0=negative): NApgr/pr ihc (1=positive, 0=negative): NAerbb2 ihc (1=positive, 0=negative): NA
GSM715690	SRR191580			tissue: Breastdisease status: NormalID: 103Aesr/er ihc (1=positive, 0=negative): NApgr/pr ihc (1=positive, 0=negative): NAerbb2 ihc (1=positive, 0=negative): NA
GSM715726	SRR191616			tissue: Breastdisease status: NormalID: 103Besr/er ihc (1=positive, 0=negative): NApgr/pr ihc (1=positive, 0=negative): NAerbb2 ihc (1=positive, 0=negative): NA
GSM715691	SRR191581			tissue: Breastdisease status: NormalID: 104Aesr/er ihc (1=positive, 0=negative): NApgr/pr ihc (1=positive, 0=negative): NAerbb2 ihc (1=positive, 0=negative): NA
GSM715727	SRR191617			tissue: Breastdisease status: NormalID: 104Cesr/er ihc (1=positive, 0=negative): NApgr/pr ihc (1=positive, 0=negative): NAerbb2 ihc (1=positive, 0=negative): NA
GSM715659	SRR191549			tissue: Breastdisease status: NormalID: 105Aesr/er ihc (1=positive, 0=negative): NApgr/pr ihc (1=positive, 0=negative): NAerbb2 ihc (1=positive, 0=negative): NA
GSM715746	SRR191636			tissue: Breastdisease status: NormalID: 105Besr/er ihc (1=positive, 0=negative): NApgr/pr ihc (1=positive, 0=negative): NAerbb2 ihc (1=positive, 0=negative): NA
GSM715692	SRR191582			tissue: Breastdisease status: NormalID: 95Aesr/er ihc (1=positive, 0=negative): NApgr/pr ihc (1=positive, 0=negative): NAerbb2 ihc (1=positive, 0=negative): NA
GSM715663	SRR191553			tissue: Breastdisease status: NormalID: 96esr/er ihc (1=positive, 0=negative): NApgr/pr ihc (1=positive, 0=negative): NAerbb2 ihc (1=positive, 0=negative): NA
GSM715693	SRR191583			tissue: Breastdisease status: NormalID: 97esr/er ihc (1=positive, 0=negative): NApgr/pr ihc (1=positive, 0=negative): NAerbb2 ihc (1=positive, 0=negative): NA
GSM715694	SRR191584			tissue: Breastdisease status: NormalID: 98Aesr/er ihc (1=positive, 0=negative): NApgr/pr ihc (1=positive, 0=negative): NAerbb2 ihc (1=positive, 0=negative): NA
GSM715744	SRR191634			tissue: Breastdisease status: NormalID: 98Cesr/er ihc (1=positive, 0=negative): NApgr/pr ihc (1=positive, 0=negative): NAerbb2 ihc (1=positive, 0=negative): NA
GSM715664	SRR191554			tissue: Breastdisease status: NormalID: 99Aesr/er ihc (1=positive, 0=negative): NApgr/pr ihc (1=positive, 0=negative): NAerbb2 ihc (1=positive, 0=negative): NA
GSM715747	SRR191637			tissue: Breastdisease status: NormalID: 99Besr/er ihc (1=positive, 0=negative): NApgr/pr ihc (1=positive, 0=negative): NAerbb2 ihc (1=positive, 0=negative): NA
GSM379267	GSM379267			tissue: clear cell ovarian cancer
GSM514985	GSE20417			tissue: colon tumors, lung tumors
GSM379265	GSM379265			tissue: endometrioid ovarian cancer
GSM651905	SRR094129			tissue: endometrium
GSM651906	SRR094130			tissue: endometrium
GSM651907	SRR094131			tissue: endometrium
GSM651908	SRR094132			tissue: endometrium
GSM510469	SRR037931			tissue: HEK293T cell linemolecule: small RNA
GSM510470	SRR037932			tissue: HEK293T cell linemolecule: small RNA
GSM510471	SRR037933			tissue: HEK293T cell linemolecule: small RNA
GSM510472	SRR037934			tissue: HEK293T cell linemolecule: small RNA
GSM510473	SRR037935			tissue: HEK293T cell linemolecule: small RNA
GSM510474	SRR037936			tissue: HEK293T cell linemolecule: small RNA
GSM510475	SRR037937			tissue: HEK293T cell linemolecule: small RNA
GSM510476	SRR037938			tissue: HEK293T cell linemolecule: small RNA
GSM510477	SRR037939			tissue: HEK293T cell linemolecule: small RNA
GSM510478	SRR037940			tissue: HEK293T cell linemolecule: small RNA
GSM510479	SRR037941			tissue: HEK293T cell linemolecule: small RNA
GSM510480	SRR037942			tissue: HEK293T cell linemolecule: small RNA
GSM510481	SRR037943			tissue: HEK293T cell linemolecule: small RNA
GSM510482	SRR037944			tissue: HEK293T cell linemolecule: small RNA
GSM531982	SRR039619			tissue: livertumor stage: HBC-related HCC Tissueclinical characteristics: Primary HBV-related HCC
GSM531984	SRR039621			tissue: livertumor stage: HBC-related HCC Tissueclinical characteristics: Primary HBV-related HCC
GSM531977	SRR039614			tissue: livertumor stage: HBV-infected Liverclinical characteristics: Distal liver tissue of liver hemangioma in HBV infected liver
GSM531980	SRR039617			tissue: livertumor stage: HBV-related HCC Adjacent Tissueclinical characteristics: Adjacent liver tissue of primary HBV-related HCC
GSM531983	SRR039620			tissue: livertumor stage: HBV-related HCC Adjacent Tissueclinical characteristics: Adjacent liver tissue of primary HBV-related HCC
GSM531979	SRR039616			tissue: livertumor stage: HBV-related HCC Distal Tissueclinical characteristics: Distal liver tissue of primary HBV-related HCC
GSM531981	SRR039618			tissue: livertumor stage: HBV-related HCC Side Tissueclinical characteristics: Side liver tissue of primary HBV-related HCC
GSM531987	SRR039624			tissue: livertumor stage: HBV(-) HCV(-) Adjacent Tissueclinical characteristics: Adjacent liver tissue of primary HBV(-) HCV(-) HCC
GSM531988	SRR039625			tissue: livertumor stage: HBV(-) HCV(-) HCC Tissueclinical characteristics: Primary HBV(-) HCV(-) HCC
GSM531985	SRR039622			tissue: livertumor stage: HCV-related HCC Adjacent Tissueclinical characteristics: Adjacent liver tissue of primary HCV-related HCC
GSM531986	SRR039623			tissue: livertumor stage: HCV-related HCC Tissueclinical characteristics: Primary HCV-related HCC
GSM531974	SRR039611			tissue: livertumor stage: Normal liverclinical characteristics: Distal normal liver tissue of liver hemangioma
GSM531975	SRR039612			tissue: livertumor stage: Normal liverclinical characteristics: Distal normal liver tissue of liver hemangioma
GSM531976	SRR039613			tissue: livertumor stage: Normal liverclinical characteristics: Distal normal liver tissue of liver hemangioma
GSM531978	SRR039615			tissue: livertumor stage: Severe Chronic Hepatitis Bclinical characteristics: Distal liver tissue of liver hemangioma in severe chronic hepatitis B liver
GSM379266	GSM379266			tissue: primary cultures of normal human ovarian surface epithelium
GSM379268	GSM379268			tissue: serous ovarian cancer
Rovira	RoviraIPAgo2	ago2		To comprehensively characterize microRNA (miRNA) expression in breast cancer, we performed the first extensive next-generation sequencing expression analysis of this disease
Rovira	TAX577453			To comprehensively characterize microRNA (miRNA) expression in breast cancer, we performed the first extensive next-generation sequencing expression analysis of this disease
Rovira	TAX577579			To comprehensively characterize microRNA (miRNA) expression in breast cancer, we performed the first extensive next-generation sequencing expression analysis of this disease
Rovira	TAX577580			To comprehensively characterize microRNA (miRNA) expression in breast cancer, we performed the first extensive next-generation sequencing expression analysis of this disease
Rovira	TAX577588			To comprehensively characterize microRNA (miRNA) expression in breast cancer, we performed the first extensive next-generation sequencing expression analysis of this disease
Rovira	TAX577589			To comprehensively characterize microRNA (miRNA) expression in breast cancer, we performed the first extensive next-generation sequencing expression analysis of this disease
Rovira	TAX577590			To comprehensively characterize microRNA (miRNA) expression in breast cancer, we performed the first extensive next-generation sequencing expression analysis of this disease
Rovira	TAX577738			To comprehensively characterize microRNA (miRNA) expression in breast cancer, we performed the first extensive next-generation sequencing expression analysis of this disease
Rovira	TAX577739			To comprehensively characterize microRNA (miRNA) expression in breast cancer, we performed the first extensive next-generation sequencing expression analysis of this disease
Rovira	TAX577740			To comprehensively characterize microRNA (miRNA) expression in breast cancer, we performed the first extensive next-generation sequencing expression analysis of this disease
Rovira	TAX577741			To comprehensively characterize microRNA (miRNA) expression in breast cancer, we performed the first extensive next-generation sequencing expression analysis of this disease
Rovira	TAX577742			To comprehensively characterize microRNA (miRNA) expression in breast cancer, we performed the first extensive next-generation sequencing expression analysis of this disease
Rovira	TAX577743			To comprehensively characterize microRNA (miRNA) expression in breast cancer, we performed the first extensive next-generation sequencing expression analysis of this disease
Rovira	TAX577744			To comprehensively characterize microRNA (miRNA) expression in breast cancer, we performed the first extensive next-generation sequencing expression analysis of this disease
Rovira	TAX577745			To comprehensively characterize microRNA (miRNA) expression in breast cancer, we performed the first extensive next-generation sequencing expression analysis of this disease
Rovira	TAX577746			To comprehensively characterize microRNA (miRNA) expression in breast cancer, we performed the first extensive next-generation sequencing expression analysis of this disease

## Sheet: human_new_libs
gsm	data_label	IP	Mutant	characteristics
DRX000313	DRR000555			A comprehensive survey of 3' animal miRNA modification events and a possible role for 3' adenylation in modulating miRNA targeting effectiveness
DRX000314	DRR000556			A comprehensive survey of 3' animal miRNA modification events and a possible role for 3' adenylation in modulating miRNA targeting effectiveness
DRX000315	DRR000557			A comprehensive survey of 3' animal miRNA modification events and a possible role for 3' adenylation in modulating miRNA targeting effectiveness
DRX000316	DRR000558			A comprehensive survey of 3' animal miRNA modification events and a possible role for 3' adenylation in modulating miRNA targeting effectiveness
DRX000317	DRR000559			A comprehensive survey of 3' animal miRNA modification events and a possible role for 3' adenylation in modulating miRNA targeting effectiveness
DRX000318	DRR000560	ago1		A comprehensive survey of 3' animal miRNA modification events and a possible role for 3' adenylation in modulating miRNA targeting effectiveness
DRX000319	DRR000561	ago2		A comprehensive survey of 3' animal miRNA modification events and a possible role for 3' adenylation in modulating miRNA targeting effectiveness
DRX000320	DRR000562	ago3		A comprehensive survey of 3' animal miRNA modification events and a possible role for 3' adenylation in modulating miRNA targeting effectiveness
GSM1105748	GSM1105748AGO1	ago1		antibodies: monoclonal antibody against endogenous human Argonaute1, clone 4B8 (Beitzinger et al., 2007)barcode srna cloning: ACTAcell line: HeLa
GSM1105749	GSM1105749AGO2	ago2		antibodies: monoclonal antibody against endogenous human Argonaute2, clone 11A9 (Ruedel et al., 2008)barcode srna cloning: GTAAcell line: HeLa
GSM1105750	GSM1105750AGO3	ago3		antibodies: monoclonal antibody against endogenous human Argonaute3, clone 5A3 Weinmann et al., 2009)barcode srna cloning: TACAcell line: HeLa
GSM1105751	GSM1105751AGO4	ago4		antibodies: monoclonal antibody against endogenous human Argonaute4, clone 6C10 (Petri et al., 2011)barcode srna cloning: ATGAcell line: HeLa
GSM1105752	GSM1105752CONTROL			antibodies: monoclonal antibody against RmC, rat protein (complement system)barcode srna cloning: GAGAcell line: HeLa
GSM1105753	GSM1105753INPUT			antibodies: nonebarcode srna cloning: CATAcell line: HeLa
SRX039177	SRR095854			Bar-coding bias in high-throughput multiplex sequencing of miRNA
GSM677703	SRR107296			cell line name: IMR90passages: 14
GSM677704	SRR107297			cell line name: IMR90passages: 34
SRX128911	SRR444063			cell line: A2058
SRX128912	SRR444064			cell line: A375P
SRX128913	SRR444065			cell line: A375SM
GSM796035	SRR343332			cell line: BC-1
GSM796036	SRR343333			cell line: BC-3
SRX128914	SRR444066			cell line: C32
GSM956925	GSM956925Ago2	ago2		cell line: HEK293 cell linepassages: 15-20ip antibody: Anti-FLAG (Sigma, Catalog# A2220, Lot# SLBB7030)
GSM956925	GSM956925Ago2D5	ago2		cell line: HEK293 cell linepassages: 15-20ip antibody: Anti-FLAG (Sigma, Catalog# A2220, Lot# SLBB7030)
GSM956925	GSM956925Ago2PAZ	ago2		cell line: HEK293 cell linepassages: 15-20ip antibody: Anti-FLAG (Sigma, Catalog# A2220, Lot# SLBB7030)
GSM956925	GSM956925AGO2Paz8	ago2		cell line: HEK293 cell linepassages: 15-20ip antibody: Anti-FLAG (Sigma, Catalog# A2220, Lot# SLBB7030)
GSM956925	GSM956925F181A			cell line: HEK293 cell linepassages: 15-20ip antibody: Anti-FLAG (Sigma, Catalog# A2220, Lot# SLBB7030)
GSM956925	GSM956925Paz8D5			cell line: HEK293 cell linepassages: 15-20ip antibody: Anti-FLAG (Sigma, Catalog# A2220, Lot# SLBB7030)
GSM956925	GSM956925PazD5			cell line: HEK293 cell linepassages: 15-20ip antibody: Anti-FLAG (Sigma, Catalog# A2220, Lot# SLBB7030)
GSM769509	SRR326279			cell line: MCF-7
GSM769510	SRR326280			cell line: MCF-7
GSM769511	SRR326281			cell line: MCF-7
GSM769512	SRR326282			cell line: MCF-7
GSM850204	SRR390725			cell line: WI-38antibody: H3K9me2antibody vendor: Upstate
GSM850202	SRR390723			cell line: WI-38antibody: none
GSM850203	SRR390724			cell line: WI-38antibody: pan AGOantibody vendor: Upstate
SRX128916	SRR444068			cell line: WM1552C
SRX128915	SRR444067			cell line: WM35
GSM830252	SRR363675			cell type: human foreskin fibroblasts (HFF)treatment: HCMV infected
GSM830253	SRR363676			cell type: human foreskin fibroblasts (HFF)treatment: HCMV infected
GSM830250	SRR363673			cell type: human foreskin fibroblasts (HFF)treatment: mock infected
GSM830251	SRR363674			cell type: human foreskin fibroblasts (HFF)treatment: mock infected
SRX182778	SRR553572			GSE40499: Evolution of mammalian miRNA genes
SRX182779	SRR553573			GSE40499: Evolution of mammalian miRNA genes
SRX182780	SRR553574			GSE40499: Evolution of mammalian miRNA genes
SRX182781	SRR553575			GSE40499: Evolution of mammalian miRNA genes
SRX182782	SRR553576			GSE40499: Evolution of mammalian miRNA genes
GSM1354722	SRR1200701			Next generation sequencing of small RNAs isolated from exosomes in human semen
GSM1354723	SRR1200702			Next generation sequencing of small RNAs isolated from exosomes in human semen
GSM1354724	SRR1200703			Next generation sequencing of small RNAs isolated from exosomes in human semen
GSM1354725	SRR1200704			Next generation sequencing of small RNAs isolated from exosomes in human semen
GSM1354726	SRR1200705			Next generation sequencing of small RNAs isolated from exosomes in human semen
GSM1354727	SRR1200706			Next generation sequencing of small RNAs isolated from exosomes in human semen
GSM1354728	SRR1200707			Next generation sequencing of small RNAs isolated from exosomes in human semen
GSM1354729	SRR1200708			Next generation sequencing of small RNAs isolated from exosomes in human semen
GSM1354730	SRR1200709			Next generation sequencing of small RNAs isolated from exosomes in human semen
GSM1354731	SRR1200710			Next generation sequencing of small RNAs isolated from exosomes in human semen
GSM1354732	SRR1200711			Next generation sequencing of small RNAs isolated from exosomes in human semen
GSM1354733	SRR1200712			Next generation sequencing of small RNAs isolated from exosomes in human semen
DRX001036	DRR001482			pre-miRNA profiles obtained through application of locked nucleic acids reveals complex 5?/3? arm variation including concomitant cleavage and polyuridylation patterns
DRX001037	DRR001483			pre-miRNA profiles obtained through application of locked nucleic acids reveals complex 5?/3? arm variation including concomitant cleavage and polyuridylation patterns
DRX001038	DRR001484			pre-miRNA profiles obtained through application of locked nucleic acids reveals complex 5?/3? arm variation including concomitant cleavage and polyuridylation patterns
DRX001039	DRR001485			pre-miRNA profiles obtained through application of locked nucleic acids reveals complex 5?/3? arm variation including concomitant cleavage and polyuridylation patterns
DRX001040	DRR001486			pre-miRNA profiles obtained through application of locked nucleic acids reveals complex 5?/3? arm variation including concomitant cleavage and polyuridylation patterns
DRX001041	DRR001487			pre-miRNA profiles obtained through application of locked nucleic acids reveals complex 5?/3? arm variation including concomitant cleavage and polyuridylation patterns
DRX001042	DRR001488			pre-miRNA profiles obtained through application of locked nucleic acids reveals complex 5?/3? arm variation including concomitant cleavage and polyuridylation patterns
DRX001043	DRR001489			pre-miRNA profiles obtained through application of locked nucleic acids reveals complex 5?/3? arm variation including concomitant cleavage and polyuridylation patterns
GSM1270011	SRR1033840			siTUT4/7 combined
GSM1270012	SRR1033841			siTUT4/7 combined
GSM876013	SRR408573			Small RNA profiles following TUT knock-down in HeLa
GSM876014	SRR408574			Small RNA profiles following TUT knock-down in HeLa
GSM876015	SRR408575			Small RNA profiles following TUT knock-down in HeLa
GSM876016	SRR408576			Small RNA profiles following TUT knock-down in HeLa
GSM876017	SRR408577			Small RNA profiles following TUT knock-down in HeLa
GSM843862	SRR387910	ago2		specific-host: Homo sapienshost cell line: Sup-T-1 (CRL-1942; ATCC)host cell type: T lymphocyteantibody for ip: Ago2
GSM843861	SRR387909			specific-host: Homo sapienshost cell line: Sup-T-1 (CRL-1942; ATCC)host cell type: T lymphocyteantibody for ip: None
SRX084354	SRR314796			subcellular: Mitochondriacell type: 143B cells
SRX087285	SRR324841			subcellular: Mitochondriacell type: 143B cells
SRX128889	SRR444041			tissue: acrolentiginous melanoma (3.0 mm, level IV)
SRX128898	SRR444050			tissue: common nevus
SRX128899	SRR444051			tissue: common nevus
SRX096791	SRR342895			tissue: Left Atrial Heart
SRX096793	SRR342897			tissue: Left Atrial Heart
SRX096795	SRR342899			tissue: Left Atrial Heart
SRX096797	SRR342901			tissue: Left Atrial Heart
SRX128904	SRR444056			tissue: melanocyte-dark
SRX128917	SRR444069			tissue: melanocyte-light
SRX128895	SRR444047			tissue: melanocyte-medium
SRX128903	SRR444055			tissue: melanocyte-medium
SRX128910	SRR444062			tissue: melanocyte-medium
SRX128918	SRR444070			tissue: melanocyte-medium
SRX128888	SRR444040			tissue: metastatic melanoma to lymph node
SRX128897	SRR444049			tissue: metastatic melanoma to lymph node
SRX128905	SRR444057			tissue: metastatic melanoma to skin
SRX128906	SRR444058			tissue: metastatic melanoma to skin
SRX128907	SRR444059			tissue: metastatic melanoma to skin
SRX128890	SRR444042			tissue: metastatic melanoma to the lymph node
SRX128896	SRR444048			tissue: normal lymph node
SRX128891	SRR444043			tissue: normal skin
SRX128893	SRR444045			tissue: normal skin
SRX128908	SRR444060			tissue: normal skin
SRX128909	SRR444061			tissue: normal skin
SRX091742	SRR330904			tissue: normal skindisease state: normal
SRX091743	SRR330905			tissue: normal skindisease state: normal
SRX091744	SRR330906			tissue: normal skindisease state: normal
SRX091745	SRR330907			tissue: normal skindisease state: normal
SRX091746	SRR330908			tissue: normal skindisease state: normal
SRX091747	SRR330909			tissue: normal skindisease state: normal
SRX091748	SRR330910			tissue: normal skindisease state: normal
SRX091749	SRR330911			tissue: normal skindisease state: normal
SRX091750	SRR330912			tissue: normal skindisease state: normal
SRX091751	SRR330913			tissue: normal skindisease state: normal
SRX091752	SRR330914			tissue: normal skindisease state: normal
SRX091753	SRR330915			tissue: normal skindisease state: normal
SRX091754	SRR330916			tissue: normal skindisease state: normal
SRX091755	SRR330917			tissue: normal skindisease state: normal
SRX091756	SRR330918			tissue: normal skindisease state: normal
SRX091757	SRR330919			tissue: normal skindisease state: normal
SRX091758	SRR330920			tissue: normal skindisease state: normal
SRX091759	SRR330921			tissue: normal skindisease state: normal
SRX091760	SRR330922			tissue: normal skindisease state: normal
SRX091761	SRR330923			tissue: normal skindisease state: normal
SRX128892	SRR444044			tissue: primary cutaneous melanoma (11.5 mm, level V)
SRX128902	SRR444054			tissue: primary cutaneous melanoma (2.0 mm, level IV)
SRX128901	SRR444053			tissue: primary cutaneous melanoma (2.5 mm, level IV)
SRX128900	SRR444052			tissue: primary cutaneous melanoma (2.8 mm, level IV)
SRX128894	SRR444046			tissue: primary cutaneous melanoma (4.0 mm, level IV)
SRX096790	SRR342894			tissue: Right Atrial Heart
SRX096792	SRR342896			tissue: Right Atrial Heart
SRX096794	SRR342898			tissue: Right Atrial Heart
SRX096796	SRR342900			tissue: Right Atrial Heart
SRX091695	SRR330857			tissue: skin psoriatic involveddisease state: psoriasis
SRX091696	SRR330858			tissue: skin psoriatic involveddisease state: psoriasis
SRX091697	SRR330859			tissue: skin psoriatic involveddisease state: psoriasis
SRX091698	SRR330860			tissue: skin psoriatic involveddisease state: psoriasis
SRX091699	SRR330861			tissue: skin psoriatic involveddisease state: psoriasis
SRX091700	SRR330862			tissue: skin psoriatic involveddisease state: psoriasis
SRX091701	SRR330863			tissue: skin psoriatic involveddisease state: psoriasis
SRX091702	SRR330864			tissue: skin psoriatic involveddisease state: psoriasis
SRX091703	SRR330865			tissue: skin psoriatic involveddisease state: psoriasis
SRX091704	SRR330866			tissue: skin psoriatic involveddisease state: psoriasis
SRX091705	SRR330867			tissue: skin psoriatic involveddisease state: psoriasis
SRX091706	SRR330868			tissue: skin psoriatic involveddisease state: psoriasis
SRX091707	SRR330869			tissue: skin psoriatic involveddisease state: psoriasis
SRX091708	SRR330870			tissue: skin psoriatic involveddisease state: psoriasis
SRX091709	SRR330871			tissue: skin psoriatic involveddisease state: psoriasis
SRX091710	SRR330872			tissue: skin psoriatic involveddisease state: psoriasis
SRX091711	SRR330873			tissue: skin psoriatic involveddisease state: psoriasis
SRX091712	SRR330874			tissue: skin psoriatic involveddisease state: psoriasis
SRX091713	SRR330875			tissue: skin psoriatic involveddisease state: psoriasis
SRX091714	SRR330876			tissue: skin psoriatic involveddisease state: psoriasis
SRX091715	SRR330877			tissue: skin psoriatic involveddisease state: psoriasis
SRX091716	SRR330878			tissue: skin psoriatic involveddisease state: psoriasis
SRX091717	SRR330879			tissue: skin psoriatic involveddisease state: psoriasis
SRX091718	SRR330880			tissue: skin psoriatic involveddisease state: psoriasis
SRX091719	SRR330881			tissue: skin psoriatic uninvolveddisease state: psoriasis
SRX091720	SRR330882			tissue: skin psoriatic uninvolveddisease state: psoriasis
SRX091721	SRR330883			tissue: skin psoriatic uninvolveddisease state: psoriasis
SRX091722	SRR330884			tissue: skin psoriatic uninvolveddisease state: psoriasis
SRX091723	SRR330885			tissue: skin psoriatic uninvolveddisease state: psoriasis
SRX091724	SRR330886			tissue: skin psoriatic uninvolveddisease state: psoriasis
SRX091725	SRR330887			tissue: skin psoriatic uninvolveddisease state: psoriasis
SRX091726	SRR330888			tissue: skin psoriatic uninvolveddisease state: psoriasis
SRX091727	SRR330889			tissue: skin psoriatic uninvolveddisease state: psoriasis
SRX091728	SRR330890			tissue: skin psoriatic uninvolveddisease state: psoriasis
SRX091729	SRR330891			tissue: skin psoriatic uninvolveddisease state: psoriasis
SRX091730	SRR330892			tissue: skin psoriatic uninvolveddisease state: psoriasis
SRX091731	SRR330893			tissue: skin psoriatic uninvolveddisease state: psoriasis
SRX091732	SRR330894			tissue: skin psoriatic uninvolveddisease state: psoriasis
SRX091733	SRR330895			tissue: skin psoriatic uninvolveddisease state: psoriasis
SRX091734	SRR330896			tissue: skin psoriatic uninvolveddisease state: psoriasis
SRX091735	SRR330897			tissue: skin psoriatic uninvolveddisease state: psoriasis
SRX091736	SRR330898			tissue: skin psoriatic uninvolveddisease state: psoriasis
SRX091737	SRR330899			tissue: skin psoriatic uninvolveddisease state: psoriasis
SRX091738	SRR330900			tissue: skin psoriatic uninvolveddisease state: psoriasis
SRX091739	SRR330901			tissue: skin psoriatic uninvolveddisease state: psoriasis
SRX091740	SRR330902			tissue: skin psoriatic uninvolveddisease state: psoriasis
SRX091741	SRR330903			tissue: skin psoriatic uninvolveddisease state: psoriasis
GSM714642	SRR189782	ago2		cell line: HEK293clip variant: CLIPenzymatic digestion: complete T1 digestionprotein: Ago2
GSM714643	SRR189783	ago2		cell line: HEK293clip variant: CLIPenzymatic digestion: complete T1 digestionprotein: Ago2
GSM714644	SRR189784	ago2		cell line: HEK293clip variant: PAR-CLIPenzymatic digestion: complete T1 digestionprotein: Ago2
GSM714645	SRR189785	ago2		cell line: HEK293clip variant: PAR-CLIPenzymatic digestion: complete T1 digestionprotein: Ago2
GSM714646	SRR189786	ago2		cell line: HEK293clip variant: PAR-CLIPenzymatic digestion: mild MNase digestionprotein: Ago2
GSM714647	SRR189787	ago2		cell line: HEK293clip variant: PAR-CLIPenzymatic digestion: mild MNase digestionprotein: Ago2
GSM796037	SRR343334	ago2		cell line: BC-1photoactivatable ribonucleoside and crosslinking wavelength: 4-SU / 365 nmantibody: Millipore anti-Ago2 clone 9E8.2immunoprecipitated protein: Ago2 (EIF2C2)
GSM796038	SRR343335	ago2		cell line: BC-1photoactivatable ribonucleoside and crosslinking wavelength: 4-SU / 365 nmantibody: Millipore anti-Ago2 clone 9E8.2immunoprecipitated protein: Ago2 (EIF2C2)
GSM796039	SRR343336	ago2		cell line: BC-3photoactivatable ribonucleoside and crosslinking wavelength: 4-SU / 365 nmantibody: Millipore anti-Ago2 clone 9E8.2immunoprecipitated protein: Ago2 (EIF2C2)
GSM796040	SRR343337	ago2		cell line: BC-3photoactivatable ribonucleoside and crosslinking wavelength: 4-SU / 365 nmantibody: Millipore anti-Ago2 clone 9E8.2immunoprecipitated protein: Ago2 (EIF2C2)

## Sheet: mouse_tot_libs
gsm	data_label	IP	Mutant	characteristics
ERR566485	ERR566485			mouse embryonic fibroblasts
ERR566486	ERR566486			mouse embryonic fibroblasts
ERR566487	ERR566487			mouse embryonic fibroblasts
ERR566664	ERR566664			siTUT4/7 combined
ERR566665	ERR566665			siTUT4/7 combined
GSM1079783	SRR685339			cell type: murine MSC cell linegenotype: Dicer f/fstrain: C57BL/6rna: small RNA
GSM1079784	SRR685340		dicer	cell type: murine MSC cell linegenotype: Dicer -/-strain: C57BL/6rna: small RNA
GSM179088	GSM179088	piwi		Strain:CD-1,tissue:testes,Age:10 days
GSM261957	GSM261957			female 4-weeks old CD1 strain
GSM261958	GSM261958			female 4-weeks old CD1 strain
GSM261959	GSM261959			female 4-weeks old CD1 strain
GSM304914	SRR069834			Cloning and high-throughput sequencing of small RNAs from neutrophils in vitro cultured from wild-type mice
GSM307156	SRR023847			miRNA (small RNA)
GSM307157	SRR023848			miRNA (small RNA)
GSM307158	SRR023849			miRNA (small RNA)
GSM307159	SRR023850			miRNA (small RNA)
GSM307160	SRR023851			miRNA (small RNA)
GSM307161	SRR023852			miRNA (small RNA)
GSM314552	GSM314552			cultured embryonic stem cells
GSM314553	GSM314553			cultured embryonic stem cells
GSM314557	GSM314557			cultured embryonic stem cells
GSM314558	GSM314558			cultured embryonic stem cells
GSM314559	GSM314559			cultured embryonic stem cells
GSM317181	GSM317181			E14.5 mouse brain
GSM317182	GSM317182			E14.5 mouse brain, IP with anti-TRIM32 antibody that was preincubated and thereby blocked with the antigenic TRIM32 peptide.
GSM317183	GSM317183	ago1		E14.5 mouse brain, IP with an anti-Ago-1 antibody (provided by Gunter Meister / Munich)
GSM317184	GSM317184	trim32		E14.5 mouse brain, IP with an anti-TRIM32 antibody.
GSM319953	SRR014229	mili		10 dpp Dnmt3L heterozygotes
GSM319954	SRR014230		mili	10 dpp Dnmt3L KO mice
GSM319955	SRR014231			16.5 dpc embryous
GSM319956	SRR014232	mili		16.5 dpc embryous
GSM319957	SRR014233	miwi2		16.5 dpc embryous
GSM319958	SRR014234			4-6 week old mice
GSM319959	SRR014235			2 day old mice
GSM319960	SRR014236			10 dpp MILI heterozygotes
GSM319961	SRR014237		mili	10 dpp MILI KO mice
GSM361394	GSM361394			Wild-type (C57BL/6), age day 6 (P6)genotype: WT; Tissue: CGNP; Age: P6
GSM361395	GSM361395			Wild-type (C57BL/6), age day 6 (P6)genotype: WT; Tissue: CGNP; Age: P6
GSM361398	GSM361398			P53-/-, Ink4c (p18) -/-, age day 6 (P6)genotype: P53-/-, Ink4c (p18) -/-; Tissue: CGNP; Age: P6
GSM361399	GSM361399			P53-/-, Ink4c (p18) -/-, age day 6 (P6)genotype: P53-/-, Ink4c (p18) -/-; Tissue: CGNP; Age: P6
GSM361402	GSM361402			P53-/-, Ink4c (p18) -/-, age day 6 (P6)genotype: P53-/-, Ink4c (p18) -/-; Tissue: CGNP; Age: P6
GSM361407	GSM361407			Ptch1+/-, Ink4c (p18) -/-, age day 6 (P6)genotype: Ptch1+/-, Ink4c (p18) -/-; Tissue: CGNP; Age: P6
GSM361408	GSM361408			Wild-type (C57BL/6), age day 6 (P6)genotype: WT; Tissue: cerebellum; Age: P6
GSM361415	GSM361415			P53-/-, Ink4c (p18) -/-, age day 6 (P6)genotype: P53-/-, Ink4c (p18) -/-; Tissue: cerebellum; Age: P6
GSM361430	GSM361430			Ptch1+/-, Ink4c (p18) -/-, age 1 monthgenotype: Ptch1+/-, Ink4c (p18) -/-; Tissue: cerebellum; Age: 1 month
GSM400967	SRR028730	tdrd1		strain: C57BL/6age: Adulttissue: testes
GSM400968	SRR028731			strain: C57BL/6age: Adulttissue: testes
GSM400969	SRR028732		mili	strain: C57BL/6tissue: testes
GSM416611	SRR029123			cell line: NIH3T3
GSM416732	GSM416732			cell line: MEF
GSM433288	SRR029036		tdrd6	tissue: 18dpp mouse testes
GSM433289	SRR029037		tdrd6	tissue: 18dpp mouse testes
GSM433290	SRR029038		tdrd6	tissue: 25dpp mouse testes
GSM433291	SRR029039		tdrd6	tissue: 25dpp mouse testes
GSM433292	SRR029040		tdrd6	tissue: 6 weeks old mouse testes
GSM433293	SRR029041		tdrd6	tissue: 6 weeks old testes
GSM433294	SRR029042		tdrd1	tissue: 18.5dpc embryo testes
GSM433295	SRR029043		tdrd1	tissue: 18.5dpc embryo testes
GSM466728	SRR034118	mili		strain: C57BL/6tissue: testesdev stage: 14 dpp
GSM466729	SRR034119	mili		strain: C57BL/6tissue: testesdev stage: 14 dpp
GSM466730	SRR034120	mili		strain: C57BL/6tissue: testesdev stage: 14 dpp
GSM466731	SRR034121	mili		strain: C57BL/6tissue: testesdev stage: 14 dpp
GSM471929	SRR039152			cell type: cardiomyocytescell line: HL-1sirna: Srf si1
GSM471930	SRR039153			cell type: cardiomyocytescell line: HL-1sirna: Srf si2
GSM471931	SRR039154			cell type: cardiomyocytescell line: HL-1sirna: siNon
GSM475279	GSM475279	miwi		stage: adultsize selection: ~18-30 ntantibody: anti-Miwi
GSM475280	GSM475280	mili		stage: adultsize selection: ~18-30 ntantibody: anti-Mili
GSM475281	GSM475281			stage: adultsize selection: ~18-30 ntantibody: none
GSM485234	SRR032476			tissue: uterus
GSM485235	SRR032477			tissue: uterus
GSM485323	SRR039183			strain: shLuc.1309
GSM485324	SRR039184			strain: shLuc.1309
GSM485325	SRR039185			strain: shLuc.1309;ROSA-rtTA
GSM485326	SRR039186			strain: shLuc.1309;ROSA-rtTA
GSM509275	GSM509275			genotype/variation: MitoPLD+/+
GSM509276	GSM509276			enotype/variation: MitoPLD-/-
GSM509277	GSM509277		piwi	development stage: E16.5tissue type: testesgenotype/variation: Mili-/-strain: C57BL/6-129
GSM509278	GSM509278		piwi	development stage: E16.5tissue type: testesgenotype/variation: Miwi2-/-strain: C57BL/6-129
GSM509279	GSM509279			development stage: E16.5tissue type: testesgenotype/variation: MVH-/-strain: C57BL/6-129
GSM509280	GSM509280			genotype/variation: MitoPLD-/-
GSM510432	SRR037896			tissue: ovarymolecule: small RNA
GSM510433	SRR037897			tissue: ovarymolecule: small RNA
GSM510434	SRR037898			tissue: ovarymolecule: small RNA
GSM510435	SRR037899			tissue: ovarymolecule: small RNA
GSM510436	SRR037900			tissue: testesmolecule: small RNA
GSM510437	SRR037901			tissue: testesmolecule: small RNA
GSM510438	SRR037902			tissue: testesmolecule: small RNA
GSM510439	SRR037903			tissue: testesmolecule: small RNA
GSM510440	SRR037904			tissue: brainmolecule: small RNA
GSM510441	SRR037905			tissue: brainmolecule: small RNA
GSM510442	SRR037906			tissue: brainmolecule: small RNA
GSM510443	SRR037907			tissue: brainmolecule: small RNA
GSM510444	GSM510444			tissue: brainmolecule: small RNA
GSM510445	SRR037908			tissue: whole newbornmolecule: small RNA
GSM510446	SRR037909			tissue: whole newbornmolecule: small RNA
GSM510447	SRR037910			tissue: whole newbornmolecule: small RNA
GSM510448	SRR037911			tissue: whole newbornmolecule: small RNA
GSM510449	SRR037912			tissue: whole newbornmolecule: small RNA
GSM510450	GSM510450			tissue: whole newbornmolecule: small RNA
GSM510451	SRR037914			tissue: whole newbornmolecule: small RNA
GSM510452	GSM510452			tissue: whole newbornmolecule: small RNA
GSM510453	GSM510453			tissue: whole newbornmolecule: small RNA
GSM510454	GSM510454			tissue: whole newbornmolecule: small RNA
GSM510455	GSM510455			tissue: whole newbornmolecule: small RNA
GSM510456	GSM510456			tissue: whole newbornmolecule: small RNA
GSM510457	SRR037919			tissue: day 12.5 embryomolecule: small RNA
GSM510458	SRR037920			tissue: day 12.5 embryomolecule: small RNA
GSM510459	SRR037921			tissue: day 12.5 embryomolecule: small RNA
GSM510460	SRR037922			tissue: day 12.5 embryomolecule: small RNA
GSM510461	SRR037923			tissue: day 9.5 embryomolecule: small RNA
GSM510462	SRR037924			tissue: day 9.5 embryomolecule: small RNA
GSM510463	SRR037925			tissue: day 9.5 embryomolecule: small RNA
GSM510464	SRR037926			tissue: day 9.5 embryomolecule: small RNA
GSM510465	SRR037927			tissue: day 7.5 embryomolecule: small RNA
GSM510466	SRR037928			tissue: day 7.5 embryomolecule: small RNA
GSM510467	SRR037929			tissue: day 7.5 embryomolecule: small RNA
GSM510468	SRR037930			tissue: day 7.5 embryomolecule: small RNA
GSM519104	GSM519104			strain: C57BL/6Jcell type: granulocyte
GSM527274	SRR039610			strain: C57BL/6age: P21genotype/variation: Dicer het
GSM527275	SRR038740		dicer	strain: C57BL/6age: P21genotype/variation: dicer ko
GSM527276	SRR038741			strain: C57BL/6age: P21genotype/variation: Dgcr8 het
GSM527277	SRR038742		dgcr8	strain: C57BL/6age: P21genotype/variation: dgcr8 ko
GSM527278	SRR038743		dicer	strain: C57BL/6age: P21genotype/variation: dicer ko
GSM527279	SRR038744			strain: C57BL/6age: P21genotype/variation: Dgcr8 het
GSM527280	SRR038745		dgcr8	strain: C57BL/6age: P21genotype/variation: dgcr8 ko
GSM533911	SRR040488			tissue: liverdevelopmental stage: E18.5genotype/variation: wild typestrain: B6/129
GSM533912	SRR040489		ago2	tissue: liverdevelopmental stage: E18.5genotype/variation: Ago2ADHstrain: B6/129
GSM539835	SRR042443			strain: C57BL/6Jgender: malesource: bone marrowisolation: fluorescence activated cell sorting
GSM539836	SRR042444			strain: C57BL/6Jgender: malesource: bone marrowisolation: fluorescence activated cell sorting
GSM539837	SRR042445			strain: C57BL/6Jgender: malesource: spleenisolation: fluorescence activated cell sorting
GSM539838	SRR042446			strain: C57BL/6Jgender: malesource: spleenisolation: fluorescence activated cell sorting
GSM539839	SRR042447			strain: C57BL/6Jgender: malesource: spleenisolation: fluorescence activated cell sorting
GSM539840	SRR042448			strain: C57BL/6Jgender: malesource: spleenisolation: CD43 negative magnetic beads selection
GSM539841	SRR042449			strain: C57BL/6Jgender: malesource: spleenisolation: CD43 negative magnetic beads selection
GSM539842	SRR042450			strain: C57BL/6Jgender: malesource: spleenisolation: CD43 negative magnetic beads selection
GSM539843	SRR042451			strain: C57BL/6Jgender: malesource: spleenisolation: CD43 negative magnetic beads selection
GSM539844	SRR042452			strain: C57BL/6Jgender: malesource: peritoneal lavageisolation: fluorescence activated cell sorting
GSM539845	SRR042453			strain: C57BL/6Jgender: malesource: spleenisolation: fluorescence activated cell sorting
GSM539846	SRR042454			strain: C57BL/6Jgender: malesource: lymph nodesisolation: fluorescence activated cell sorting
GSM539847	SRR042455			strain: IL-6 transgenicgender: malesource: lymph nodesisolation: fluorescence activated cell sorting
GSM539848	SRR042456			strain: C57BL/6Jgender: malesource: bone marrow
GSM539849	SRR042457			strain: C57BL/6Jgender: malesource: bone marrow
GSM539850	SRR042458			strain: C57BL/6Jgender: malesource: bone marrow
GSM539851	SRR042459			strain: C57BL/6Jgender: malesource: peritoneal lavage
GSM539852	SRR042460			strain: C57BL/6Jgender: malesource: peritoneal lavage
GSM539853	SRR042461			strain: C57BL/6Jgender: malesource: bone marrow
GSM539854	SRR042462			strain: C57BL/6Jgender: malesource: bone marrow
GSM539855	SRR042463			strain: RAG-/-gender: malesource: spleen
GSM539856	SRR042464			strain: C57BL/6Jgender: malesource: thymus
GSM539857	SRR042465			strain: C57BL/6Jgender: malesource: spleen
GSM539858	SRR042466			strain: C57BL/6Jgender: malesource: spleen
GSM539859	SRR042467			strain: C57BL/6Jgender: malesource: spleen
GSM539860	SRR042468			strain: C57BL/6Jgender: malesource: lymph nodes/spleen
GSM539861	SRR042469			strain: C57BL/6Jgender: malesource: lymph nodes/spleen
GSM539862	SRR042470			strain: C57BL/6Jgender: malesource: lymph nodes/spleen
GSM539863	SRR042471			strain: C57BL/6Jgender: malesource: spleenisolation: fluorescence activated cell sorting
GSM539864	SRR042472			strain: C57BL/6Jgender: malesource: lymph nodes/spleen
GSM539865	SRR042473			strain: C57BL/6Jgender: malesource: lymph nodes/spleenisolation: fluorescence activated cell sorting
GSM539866	SRR042474			strain: C57BL/6-129
GSM539867	SRR042475			strain: C57BL/6Jdevelopmental stage: E13.5
GSM539868	SRR042476			strain: C57BL/6Jgender: maletissue: heart
GSM539869	SRR042477			strain: C57BL/6Jgender: maletissue: brain
GSM539870	SRR042478			strain: C57BL/6Jgender: maletissue: lung
GSM539871	SRR042479			strain: C57BL/6Jgender: maletissue: liver
GSM539872	SRR042480			strain: C57BL/6Jgender: maletissue: kidney
GSM539873	SRR042481			strain: C57BL/6Jgender: maletissue: pancreas
GSM539874	SRR042482			strain: C57BL/6Jgender: maletissue: skin
GSM539875	SRR042483			strain: C57BL/6Jgender: maletissue: skeletal muscle
GSM539876	SRR042484			strain: C57BL/6Jgender: maletissue: salivary glands
GSM539877	SRR042485			strain: C57BL/6Jgender: maletissue: testes
GSM539878	SRR042486			strain: C57BL/6Jgender: femaletissue: ovaries
GSM539879	SRR042487			strain: BclXL transgenic BalbCgender: malesource: spleen
GSM539880	SRR042488			strain: BclXL transgenic BalbCgender: malesource: lymph nodes
GSM545783	SRR051939	mov10l		strain: C57BL/6genotype: wild typeage: Adultantibody: Mov10l1 antibody (purified polyclonal)
GSM545784	SRR051940			strain: C57BL/6genotype: Mov10l+/- mutantage: 10 dppantibody: Total small RNAs
GSM545785	SRR051941		mov10l	strain: C57BL/6genotype: Mov10l-/- mutantage: 10 dppantibody: Total small RNAs
GSM561991	SRR060845			strain: C57BL/6tissue: whole braindevelopmental stage: embryonic day 15.5
GSM562827	SRR059765			genetic background: C57BL/6 backcrossedsample type: FACS-sorted from thymus of Lck-cre miceage: 6-7 weekscell type: DN3 thymocytes
GSM562828	SRR059766			genetic background: C57BL/6 backcrossedsample type: FACS-sorted from thymus of Drosha Lck-cre miceage: 6-7 weekscell type: DN3 thymocytes
GSM562829	SRR059767			genetic background: C57BL/6 backcrossedsample type: FACS-sorted from thymus of Dicer Lck-cre miceage: 6-7 weekscell type: DN3 thymocytes
GSM562830	SRR059768			genetic background: C57BL/6 backcrossedsample type: FACS-sorted from spleen and lymph nodes of CD4-cre miceage: 6-7 weekscell type: CD4+CD25+ Treg
GSM562831	SRR059769			genetic background: C57BL/6 backcrossedsample type: FACS-sorted from spleen and lymph nodes of Drosha CD4-cre miceage: 6-7 weekscell type: CD4+CD25+ Treg
GSM562832	SRR059770			genetic background: C57BL/6 backcrossedsample type: FACS-sorted from spleen and lymph nodes of Dicer CD4-cre miceage: 6-7 weekscell type: CD4+CD25+ Treg
GSM562833	SRR059771			genetic background: C57BL/6 backcrossedsample type: FACS-sorted from spleen and lymph nodes of CD4-cre miceage: 6-7 weekscell type: CD4+ T cell
GSM562834	SRR059772			genetic background: C57BL/6 backcrossedsample type: FACS-sorted from spleen and lymph nodes of Drosha CD4-cre miceage: 6-7 weekscell type: CD4+ T cell
GSM562835	SRR059773			genetic background: C57BL/6 backcrossedsample type: FACS-sorted from spleen and lymph nodes of Dicer CD4-cre miceage: 6-7 weekscell type: CD4+ T cell
GSM562836	SRR059774			genetic background: C57BL/6 backcrossedsample type: Derived from E14.5 Rosa26-CreER emybryosage: 6-7 weekscell type: MEF
GSM562837	SRR059775			genetic background: C57BL/6 backcrossedsample type: Derived from E14.5 Drosha Rosa26-CreER emybryosage: 6-7 weekscell type: MEF
GSM562838	SRR059776			genetic background: C57BL/6 backcrossedsample type: Derived from E14.5 Dicer Rosa26-CreER emybryosage: 6-7 weekscell type: MEF
GSM566419	GSM566419			cell type: mouse embryo fibroblastcell line: NIH3T3
GSM566420	GSM566420			cell type: mouse embryo fibroblastcell line: NIH3T3
GSM566421	GSM566421			cell type: mouse B lymphomacell line: S11
GSM566422	GSM566422			cell type: mouse B lymphomacell line: S11
GSM610965	SRR069809			strain: ICRtissue: testiscell type: Type A spermatogonia
GSM610966	SRR069810			strain: ICRtissue: testiscell type: Pachytene spermatocytes
GSM610967	SRR069811			strain: ICRtissue: testiscell type: Round spermatids
GSM629280	SRR073954			genetic background: C57BL/6cell type: CFU-E late erythroid progenitorsdevelopmental stage: E14.5
GSM629281	SRR073955			genetic background: C57BL/6cell type: Ter119+ mature erythroblastsdevelopmental stage: E14.5
GSM637801	SRR077864			strain: C57BL/6tissue: Livertreatment: scAAV9-Mocktime: 4 wks post-injection
GSM637802	SRR077865			strain: C57BL/6tissue: Livertreatment: scAAV9-TuD-miR-122time: 4 wks post-injection
GSM637803	SRR077866			strain: C57BL/6tissue: Livertreatment: scAAV9-TuD-let-7time: 4 wks post-injection
GSM640576	GSM640576			strain: C57/Bl6age: 3 weeks
GSM640577	GSM640577			strain: C57/Bl6age: 3 weeks
GSM640578	GSM640578			strain: C57/Bl6age: 3 weeks
GSM640579	GSM640579			strain: C57/Bl6age: 3 weeks
GSM640580	GSM640580			strain: C57/Bl6age: 3 weeks
GSM640581	GSM640581			strain: C57/Bl6age: 3 weeks
GSM640582	GSM640582			strain: C57/Bl6age: 3 weeks
GSM640583	GSM640583			strain: C57/Bl6age: 3 weeks
GSM678422	SRR116846			strain: C57genotype: wildtypetissue: epididymisdevelopmental stage: adultgender: male
GSM689053	SRR279903			cell type: mouse embryonic stem cellcell line: AB2.2genotype/variation: wt
GSM689054	SRR279904			cell type: mouse embryonic stem cellcell line: AB2.2genotype/variation: wt
GSM689055	SRR279905			cell type: mouse embryonic stem cellcell line: AB2.2genotype/variation: 5pmut
GSM689056	SRR279906			cell type: mouse embryonic stem cellcell line: AB2.2genotype/variation: 5pmut
GSM689057	SRR279907			cell type: mouse embryonic stem cellcell line: R1
GSM723280	SRR206939			strain: C57BL/6tissue: Braintreatment: Salineread length: 50
GSM723281	SRR206940			strain: C57BL/6tissue: Braintreatment: Cocaineread length: 50
GSM723282	SRR206941			strain: C57BL/6tissue: Braintreatment: Salineread length: 40
GSM723283	SRR206942			strain: C57BL/6tissue: Braintreatment: Cocaineread length: 40
GSM733811	SRR248523			cell type: Thy1+ spermatogonial stem cellstrain: C57BL/6source tissue: Testispassages: N/Amacs antibody: Thy1.2 MACS Antibody
GSM733812	SRR248524			cell type: Thy1+ spermatogonial stem cellstrain: C57BL/6source tissue: Testispassages: N/Amacs antibody: Thy1.2 MACS Antibody
GSM733813	SRR248525			cell type: Thy1- spermatogonial stem cellstrain: C57BL/6source tissue: Testispassages: N/Amacs antibody: Thy1.2 MACS Antibody
GSM733814	SRR248526			cell type: Thy1- spermatogonial stem cellstrain: C57BL/6source tissue: Testispassages: N/Amacs antibody: Thy1.2 MACS Antibody
GSM733815	SRR248527			cell type: spermatogonial stem cell enriched cell culturestrain: C57BL/6source tissue: Testispassages: ~10macs antibody: Thy1.2 MACS Antibody
GSM750569	SRR306526	ago2		background strain: C57BL/6 &amp;amp; black swissmouse age: P56tissue: Cerebellumnumber of pooled tissues: 1ip antibody: anti-Ago2 (2E12-1C9, Abnova)
GSM750570	SRR306527	ago2		background strain: C57BL/6 &amp;amp; black swissmouse age: P56tissue: Cerebellumnumber of pooled tissues: 1ip antibody: anti-Ago2 (2E12-1C9, Abnova)
GSM750571	SRR306528	ago2		background strain: C57BL/6 &amp;amp; black swissmouse age: P56tissue: Cerebellumnumber of pooled tissues: 1ip antibody: anti-Ago2 (2E12-1C9, Abnova)
GSM750572	SRR306529	ago2		background strain: C57BL/6 &amp;amp; black swissmouse age: P56tissue: Cerebellumnumber of pooled tissues: 3ip antibody: anti-myc (sc-40, Santa Cruz Biotechnology)
GSM750573	SRR306530	ago2		background strain: C57BL/6 &amp;amp; black swissmouse age: P56tissue: Cerebellumnumber of pooled tissues: 3ip antibody: anti-myc (sc-40, Santa Cruz Biotechnology)
GSM750574	SRR306531	ago2		background strain: C57BL/6 &amp;amp; black swissmouse age: P56tissue: Cerebellumnumber of pooled tissues: 3ip antibody: anti-myc (sc-40, Santa Cruz Biotechnology)
GSM750575	SRR306532	ago2		background strain: C57BL/6 &amp;amp; BALB/cmouse age: P56tissue: Neocortexnumber of pooled tissues: 1ip antibody: anti-myc (sc-40, Santa Cruz Biotechnology)
GSM750576	SRR306533	ago2		background strain: C57BL/6 &amp;amp; BALB/cmouse age: P56tissue: Neocortexnumber of pooled tissues: 1ip antibody: anti-myc (sc-40, Santa Cruz Biotechnology)
GSM750577	SRR306534	ago2		background strain: C57BL/6 &amp;amp; BALB/cmouse age: P56tissue: Neocortexnumber of pooled tissues: 1ip antibody: anti-myc (sc-40, Santa Cruz Biotechnology)
GSM750578	SRR306535	ago2		background strain: C57BL/6 &amp;amp; 129mouse age: P56tissue: Neocortexnumber of pooled tissues: 4ip antibody: anti-myc (sc-40, Santa Cruz Biotechnology)
GSM750579	SRR306536	ago2		background strain: C57BL/6 &amp;amp; 129mouse age: P56tissue: Neocortexnumber of pooled tissues: 4ip antibody: anti-myc (sc-40, Santa Cruz Biotechnology)
GSM750580	SRR306537	ago2		background strain: C57BL/6 &amp;amp; 129mouse age: P56tissue: Neocortexnumber of pooled tissues: 4ip antibody: anti-myc (sc-40, Santa Cruz Biotechnology)
GSM750581	SRR306538	ago2		background strain: C57BL/6 &amp;amp; BALB/cmouse age: P56tissue: Neocortexnumber of pooled tissues: 1ip antibody: anti-Ago2 (2E12-1C9, Abnova)
GSM750582	SRR306539	ago2		background strain: C57BL/6 &amp;amp; BALB/cmouse age: P56tissue: Neocortexnumber of pooled tissues: 1ip antibody: anti-Ago2 (2E12-1C9, Abnova)
GSM750583	SRR306540	ago2		background strain: C57BL/6 &amp;amp; BALB/cmouse age: P56tissue: Neocortexnumber of pooled tissues: 1ip antibody: anti-Ago2 (2E12-1C9, Abnova)
GSM750584	SRR306541	ago2		background strain: C57BL/6 &amp;amp; 129mouse age: P56tissue: Neocortexnumber of pooled tissues: 4ip antibody: anti-myc (sc-40, Santa Cruz Biotechnology)
GSM750585	SRR306542	ago2		background strain: C57BL/6 &amp;amp; 129mouse age: P56tissue: Neocortexnumber of pooled tissues: 4ip antibody: anti-myc (sc-40, Santa Cruz Biotechnology)
GSM750586	SRR306543	ago2		background strain: C57BL/6 &amp;amp; 129mouse age: P56tissue: Neocortexnumber of pooled tissues: 4ip antibody: anti-myc (sc-40, Santa Cruz Biotechnology)
GSM750587	SRR306544	ago2		background strain: C57BL/6 &amp;amp; 129mouse age: P56tissue: Neocortexnumber of pooled tissues: 4ip antibody: anti-myc (sc-40, Santa Cruz Biotechnology)
GSM822758	SRR363956			developmental stage: P14tissue: Testesstrain: C57BL/6genotype/variation: wildtype, Miwi +/+
GSM822759	SRR363957			developmental stage: P20tissue: Testesstrain: C57BL/6genotype/variation: wildtype, Miwi +/+
GSM822760	SRR363958			developmental stage: Adulttissue: Testesstrain: C57BL/6genotype/variation: wildtype, Miwi +/+
GSM822761	SRR363959			developmental stage: Adulttissue: Testesstrain: C57BL/6genotype/variation: Miwi +/ADH
GSM822762	SRR363960			developmental stage: Adulttissue: Testesstrain: C57BL/6genotype/variation: Miwi -/ADH
GSM822765	SRR363963			developmental stage: Adulttissue: Testesstrain: C57BL/6genotype/variation: Miwi +/-
GSM822766	SRR363964			developmental stage: Adulttissue: Testesstrain: C57BL/6genotype/variation: Miwi -/ADH
GSM849855	SRR390297			cell line: NIH-3T3cell type: fibroblastip antibody: None
GSM849856	SRR390298			cell line: NIH-3T3cell type: fibroblastinfected with: murine cytomegalovirus (MCMV)ip antibody: None
GSM849857	SRR390299	ago2		cell line: NIH-3T3cell type: fibroblastip antibody: mAgo2-antibodyip antibody vendor: Wakoip antibody cat #: 2D4
GSM849858	SRR390300	ago2		cell line: NIH-3T3cell type: fibroblastinfected with: murine cytomegalovirus (MCMV)ip antibody: mAgo2-antibodyip antibody vendor: Wakoip antibody cat #: 2D4
GSM852140	SRR391845			gender: femalegenotype/variation: wild typetissue: whole embryodevelopmental stage: E11.5replicate #: 1ststrain: SV129
GSM852141	SRR391846			gender: femalegenotype/variation: ADAR2-/-tissue: whole embryodevelopmental stage: E11.5replicate #: 1ststrain: SV129
GSM852142	SRR391847			gender: femalegenotype/variation: ADAR2-/-/ADAR1-/-tissue: whole embryodevelopmental stage: E11.5replicate #: 1ststrain: SV129
GSM852143	SRR391848			gender: femalegenotype/variation: wild typetissue: whole embryodevelopmental stage: E11.5replicate #: 2ndstrain: SV129
GSM852144	SRR391849			gender: femalegenotype/variation: ADAR2-/-tissue: whole embryodevelopmental stage: E11.5replicate #: 2ndstrain: SV129
GSM852145	SRR391850			gender: femalegenotype/variation: ADAR2-/-/ADAR1-/-tissue: whole embryodevelopmental stage: E11.5replicate #: 2ndstrain: SV129
GSM852146	SRR391851			gender: femalegenotype/variation: wild typetissue: whole embryodevelopmental stage: E11.5replicate #: 3rdstrain: SV129
GSM852147	SRR391852			gender: femalegenotype/variation: ADAR2-/-tissue: whole embryodevelopmental stage: E11.5replicate #: 3rdstrain: SV129
GSM852148	SRR391853			gender: femalegenotype/variation: ADAR2-/-/ADAR1-/-tissue: whole embryodevelopmental stage: E11.5replicate #: 3rdstrain: SV129
GSM855969	SRR394083			background strain: C57BL6/SV129cell type: KRasG12D,p53 -/- murine sarcoma cellsgenotype: Dicer f/-
GSM855970	SRR394084		dicer	background strain: C57BL6/SV129cell type: KRasG12D,p53 -/- murine sarcoma cellsgenotype: Dicer -/-
Rui et al. PNAS 106(2):498-502 (obtained by a request to authors)	RuiDcrKO		dicer	DGCR8-dependent microRNA biogenesis is essential for skin development
Rui et al. PNAS 106(2):498-502 (obtained by a request to authors)	RuiDcrWT			DGCR8-dependent microRNA biogenesis is essential for skin development
Rui et al. PNAS 106(2):498-502 (obtained by a request to authors)	RuiDGCR8KO		dgcr8	DGCR8-dependent microRNA biogenesis is essential for skin development
Rui et al. PNAS 106(2):498-502 (obtained by a request to authors)	RuiDGCR8WT			DGCR8-dependent microRNA biogenesis is essential for skin development
Rui et al. PNAS 106(2):498-502 (obtained by a request to authors)	Ago1IP517	ago1		Quantitative functions of Argonaute proteins in mammalian development
Rui et al. PNAS 106(2):498-502 (obtained by a request to authors)	Ago1IP812	ago1		Quantitative functions of Argonaute proteins in mammalian development
Rui et al. PNAS 106(2):498-502 (obtained by a request to authors)	Ago2IP504	ago2		Quantitative functions of Argonaute proteins in mammalian development
Rui et al. PNAS 106(2):498-502 (obtained by a request to authors)	Ago2IP517	ago2		Quantitative functions of Argonaute proteins in mammalian development
Rui et al. PNAS 106(2):498-502 (obtained by a request to authors)	Ago3IP805	ago3		Quantitative functions of Argonaute proteins in mammalian development
Rui et al. PNAS 106(2):498-502 (obtained by a request to authors)	Ago3IP812	ago3		Quantitative functions of Argonaute proteins in mammalian development
SRA056111/SRX170313	SRR525237			Mus musculus domesticus miRNA sequencing
SRA056111/SRX170314	SRR525238			Mus musculus domesticus miRNA sequencing
SRA056111/SRX170315	SRR525239	ago1		Mus musculus domesticus miRNA sequencing
SRA056111/SRX170316	SRR525240	ago1		Mus musculus domesticus miRNA sequencing
SRA056111/SRX170317	SRR525241	ago1		Mus musculus domesticus miRNA sequencing
SRA056111/SRX170318	SRR525242	ago2		Mus musculus domesticus miRNA sequencing
SRA056111/SRX170319	SRR525243	ago2		Mus musculus domesticus miRNA sequencing
SRA056111/SRX170320	SRR525244	ago2		Mus musculus domesticus miRNA sequencing
SRR065045	SRR065045			Tissue-specific Regulation of Mouse MicroRNA Genes in Endodermally-Derived Tissues
SRR065046	SRR065046			Tissue-specific Regulation of Mouse MicroRNA Genes in Endodermally-Derived Tissues
SRR065047	SRR065047			Tissue-specific Regulation of Mouse MicroRNA Genes in Endodermally-Derived Tissues
SRR065048	SRR065048			Tissue-specific Regulation of Mouse MicroRNA Genes in Endodermally-Derived Tissues
SRR065049	SRR065049			Tissue-specific Regulation of Mouse MicroRNA Genes in Endodermally-Derived Tissues
SRR065050	SRR065050			Tissue-specific Regulation of Mouse MicroRNA Genes in Endodermally-Derived Tissues
SRR065052	SRR065052			Tissue-specific Regulation of Mouse MicroRNA Genes in Endodermally-Derived Tissues
SRR065053	SRR065053			Tissue-specific Regulation of Mouse MicroRNA Genes in Endodermally-Derived Tissues
SRR065054	SRR065054			Tissue-specific Regulation of Mouse MicroRNA Genes in Endodermally-Derived Tissues
SRR065055	SRR065055			Tissue-specific Regulation of Mouse MicroRNA Genes in Endodermally-Derived Tissues
SRR065056	SRR065056			Tissue-specific Regulation of Mouse MicroRNA Genes in Endodermally-Derived Tissues
SRR065058	SRR065058			Tissue-specific Regulation of Mouse MicroRNA Genes in Endodermally-Derived Tissues
SRR065059	SRR065059			Tissue-specific Regulation of Mouse MicroRNA Genes in Endodermally-Derived Tissues
SRX039174	SRR095853			Bar-coding bias in high-throughput multiplex sequencing of miRNA
SRX039178	SRR095855BC1			Bar-coding bias in high-throughput multiplex sequencing of miRNA
SRX039178	SRR095855BC10			Bar-coding bias in high-throughput multiplex sequencing of miRNA
SRX039178	SRR095855BC2			Bar-coding bias in high-throughput multiplex sequencing of miRNA
SRX039178	SRR095855BC3			Bar-coding bias in high-throughput multiplex sequencing of miRNA
SRX039178	SRR095855BC4			Bar-coding bias in high-throughput multiplex sequencing of miRNA
SRX039178	SRR095855BC5			Bar-coding bias in high-throughput multiplex sequencing of miRNA
SRX039178	SRR095855BC6			Bar-coding bias in high-throughput multiplex sequencing of miRNA
SRX039178	SRR095855BC7			Bar-coding bias in high-throughput multiplex sequencing of miRNA
SRX039178	SRR095855BC8			Bar-coding bias in high-throughput multiplex sequencing of miRNA
SRX039178	SRR095855BC9			Bar-coding bias in high-throughput multiplex sequencing of miRNA
SRX097257	SRR345196			GSE32055: Neuronal activity regulates hippocampal miRNA expression
SRX097258	SRR345197			GSE32055: Neuronal activity regulates hippocampal miRNA expression
SRX097259	SRR345198			GSE32055: Neuronal activity regulates hippocampal miRNA expression
SRX097260	SRR345199			GSE32055: Neuronal activity regulates hippocampal miRNA expression
SRX097261	SRR345200			GSE32055: Neuronal activity regulates hippocampal miRNA expression
SRX097262	SRR345201			GSE32055: Neuronal activity regulates hippocampal miRNA expression
SRX097263	SRR345202			GSE32055: Neuronal activity regulates hippocampal miRNA expression
SRX097264	SRR345203			GSE32055: Neuronal activity regulates hippocampal miRNA expression
SRX097265	SRR345204			GSE32055: Neuronal activity regulates hippocampal miRNA expression
SRX097266	SRR345205			GSE32055: Neuronal activity regulates hippocampal miRNA expression
SRX097267	SRR345206			GSE32055: Neuronal activity regulates hippocampal miRNA expression
SRX097268	SRR345207			GSE32055: Neuronal activity regulates hippocampal miRNA expression
SRX098254	SRR346413			Global profiling of miRNA and the hairpin precursor
SRX098255	SRR346414			Global profiling of miRNA and the hairpin precursor
SRX098256	SRR346415			Global profiling of miRNA and the hairpin precursor
SRX098257	SRR346416			Global profiling of miRNA and the hairpin precursor
SRX098258	SRR346417			Global profiling of miRNA and the hairpin precursor
SRX098259	SRR346418			Global profiling of miRNA and the hairpin precursor
SRX098260	SRR346419			Global profiling of miRNA and the hairpin precursor
SRX098261	SRR346420			Global profiling of miRNA and the hairpin precursor
SRX098263	SRR346421			Global profiling of miRNA and the hairpin precursor
SRX098264	SRR346422			Global profiling of miRNA and the hairpin precursor
SRX098265	SRR346423			Global profiling of miRNA and the hairpin precursor
SRX098266	SRR346424			Global profiling of miRNA and the hairpin precursor
SRX098267	SRR346425			Global profiling of miRNA and the hairpin precursor
SRX117943	SRR402760			GSE35368: Deep-sequencing influences the results obtained in small-RNA sequencing
SRX117944	SRR402761			GSE35368: Deep-sequencing influences the results obtained in small-RNA sequencing
SRX117945	SRR402762			GSE35368: Deep-sequencing influences the results obtained in small-RNA sequencing
SRX117949	SRR402766			GSE35368: Deep-sequencing influences the results obtained in small-RNA sequencing
SRX180174	SRR546155	ago2		Global profiling of miRNA and the hairpin precursor
SRX180174	SRR546156	ago2		Global profiling of miRNA and the hairpin precursor
SRX180174	SRR546157	ago2		Global profiling of miRNA and the hairpin precursor
SRX182788	SRR553582			GSE40499: Evolution of mammalian miRNA genes
SRX182789	SRR553583			GSE40499: Evolution of mammalian miRNA genes
SRX182790	SRR553584			GSE40499: Evolution of mammalian miRNA genes
SRX182791	SRR553585			GSE40499: Evolution of mammalian miRNA genes
SRX182792	SRR553586			GSE40499: Evolution of mammalian miRNA genes
SRX182808	SRR553602			GSE40499: Evolution of mammalian miRNA genes
SRX182809	SRR553603			GSE40499: Evolution of mammalian miRNA genes
SRX182810	SRR553604			GSE40499: Evolution of mammalian miRNA genes

## Sheet: mouse_new_libs
gsm	data_label	IP	Mutant	characteristics
ERR566485	ERR566485			mouse embryonic fibroblasts
ERR566486	ERR566486			mouse embryonic fibroblasts
ERR566487	ERR566487			mouse embryonic fibroblasts
ERR566664	ERR566664			siTUT4/7 combined
ERR566665	ERR566665			siTUT4/7 combined
GSM1079783	SRR685339			cell type: murine MSC cell linegenotype: Dicer f/fstrain: C57BL/6rna: small RNA
GSM1079784	SRR685340		dicer	cell type: murine MSC cell linegenotype: Dicer -/-strain: C57BL/6rna: small RNA
GSM637801	SRR077864			strain: C57BL/6tissue: Livertreatment: scAAV9-Mocktime: 4 wks post-injection
GSM637802	SRR077865			strain: C57BL/6tissue: Livertreatment: scAAV9-TuD-miR-122time: 4 wks post-injection
GSM637803	SRR077866			strain: C57BL/6tissue: Livertreatment: scAAV9-TuD-let-7time: 4 wks post-injection
GSM733811	SRR248523			cell type: Thy1+ spermatogonial stem cellstrain: C57BL/6source tissue: Testispassages: N/Amacs antibody: Thy1.2 MACS Antibody
GSM733812	SRR248524			cell type: Thy1+ spermatogonial stem cellstrain: C57BL/6source tissue: Testispassages: N/Amacs antibody: Thy1.2 MACS Antibody
GSM733813	SRR248525			cell type: Thy1- spermatogonial stem cellstrain: C57BL/6source tissue: Testispassages: N/Amacs antibody: Thy1.2 MACS Antibody
GSM733814	SRR248526			cell type: Thy1- spermatogonial stem cellstrain: C57BL/6source tissue: Testispassages: N/Amacs antibody: Thy1.2 MACS Antibody
GSM733815	SRR248527			cell type: spermatogonial stem cell enriched cell culturestrain: C57BL/6source tissue: Testispassages: ~10macs antibody: Thy1.2 MACS Antibody
GSM750569	SRR306526	ago2		background strain: C57BL/6 &amp;amp; black swissmouse age: P56tissue: Cerebellumnumber of pooled tissues: 1ip antibody: anti-Ago2 (2E12-1C9, Abnova)
GSM750570	SRR306527	ago2		background strain: C57BL/6 &amp;amp; black swissmouse age: P56tissue: Cerebellumnumber of pooled tissues: 1ip antibody: anti-Ago2 (2E12-1C9, Abnova)
GSM750571	SRR306528	ago2		background strain: C57BL/6 &amp;amp; black swissmouse age: P56tissue: Cerebellumnumber of pooled tissues: 1ip antibody: anti-Ago2 (2E12-1C9, Abnova)
GSM750572	SRR306529	ago2		background strain: C57BL/6 &amp;amp; black swissmouse age: P56tissue: Cerebellumnumber of pooled tissues: 3ip antibody: anti-myc (sc-40, Santa Cruz Biotechnology)
GSM750573	SRR306530	ago2		background strain: C57BL/6 &amp;amp; black swissmouse age: P56tissue: Cerebellumnumber of pooled tissues: 3ip antibody: anti-myc (sc-40, Santa Cruz Biotechnology)
GSM750574	SRR306531	ago2		background strain: C57BL/6 &amp;amp; black swissmouse age: P56tissue: Cerebellumnumber of pooled tissues: 3ip antibody: anti-myc (sc-40, Santa Cruz Biotechnology)
GSM750575	SRR306532	ago2		background strain: C57BL/6 &amp;amp; BALB/cmouse age: P56tissue: Neocortexnumber of pooled tissues: 1ip antibody: anti-myc (sc-40, Santa Cruz Biotechnology)
GSM750576	SRR306533	ago2		background strain: C57BL/6 &amp;amp; BALB/cmouse age: P56tissue: Neocortexnumber of pooled tissues: 1ip antibody: anti-myc (sc-40, Santa Cruz Biotechnology)
GSM750577	SRR306534	ago2		background strain: C57BL/6 &amp;amp; BALB/cmouse age: P56tissue: Neocortexnumber of pooled tissues: 1ip antibody: anti-myc (sc-40, Santa Cruz Biotechnology)
GSM750578	SRR306535	ago2		background strain: C57BL/6 &amp;amp; 129mouse age: P56tissue: Neocortexnumber of pooled tissues: 4ip antibody: anti-myc (sc-40, Santa Cruz Biotechnology)
GSM750579	SRR306536	ago2		background strain: C57BL/6 &amp;amp; 129mouse age: P56tissue: Neocortexnumber of pooled tissues: 4ip antibody: anti-myc (sc-40, Santa Cruz Biotechnology)
GSM750580	SRR306537	ago2		background strain: C57BL/6 &amp;amp; 129mouse age: P56tissue: Neocortexnumber of pooled tissues: 4ip antibody: anti-myc (sc-40, Santa Cruz Biotechnology)
GSM750581	SRR306538	ago2		background strain: C57BL/6 &amp;amp; BALB/cmouse age: P56tissue: Neocortexnumber of pooled tissues: 1ip antibody: anti-Ago2 (2E12-1C9, Abnova)
GSM750582	SRR306539	ago2		background strain: C57BL/6 &amp;amp; BALB/cmouse age: P56tissue: Neocortexnumber of pooled tissues: 1ip antibody: anti-Ago2 (2E12-1C9, Abnova)
GSM750583	SRR306540	ago2		background strain: C57BL/6 &amp;amp; BALB/cmouse age: P56tissue: Neocortexnumber of pooled tissues: 1ip antibody: anti-Ago2 (2E12-1C9, Abnova)
GSM750584	SRR306541	ago2		background strain: C57BL/6 &amp;amp; 129mouse age: P56tissue: Neocortexnumber of pooled tissues: 4ip antibody: anti-myc (sc-40, Santa Cruz Biotechnology)
GSM750585	SRR306542	ago2		background strain: C57BL/6 &amp;amp; 129mouse age: P56tissue: Neocortexnumber of pooled tissues: 4ip antibody: anti-myc (sc-40, Santa Cruz Biotechnology)
GSM750586	SRR306543	ago2		background strain: C57BL/6 &amp;amp; 129mouse age: P56tissue: Neocortexnumber of pooled tissues: 4ip antibody: anti-myc (sc-40, Santa Cruz Biotechnology)
GSM750587	SRR306544	ago2		background strain: C57BL/6 &amp;amp; 129mouse age: P56tissue: Neocortexnumber of pooled tissues: 4ip antibody: anti-myc (sc-40, Santa Cruz Biotechnology)
GSM822758	SRR363956			developmental stage: P14tissue: Testesstrain: C57BL/6genotype/variation: wildtype, Miwi +/+
GSM822759	SRR363957			developmental stage: P20tissue: Testesstrain: C57BL/6genotype/variation: wildtype, Miwi +/+
GSM822760	SRR363958			developmental stage: Adulttissue: Testesstrain: C57BL/6genotype/variation: wildtype, Miwi +/+
GSM822761	SRR363959			developmental stage: Adulttissue: Testesstrain: C57BL/6genotype/variation: Miwi +/ADH
GSM822762	SRR363960			developmental stage: Adulttissue: Testesstrain: C57BL/6genotype/variation: Miwi -/ADH
GSM822765	SRR363963			developmental stage: Adulttissue: Testesstrain: C57BL/6genotype/variation: Miwi +/-
GSM822766	SRR363964			developmental stage: Adulttissue: Testesstrain: C57BL/6genotype/variation: Miwi -/ADH
GSM849855	SRR390297			cell line: NIH-3T3cell type: fibroblastip antibody: None
GSM849856	SRR390298			cell line: NIH-3T3cell type: fibroblastinfected with: murine cytomegalovirus (MCMV)ip antibody: None
GSM849857	SRR390299	ago2		cell line: NIH-3T3cell type: fibroblastip antibody: mAgo2-antibodyip antibody vendor: Wakoip antibody cat #: 2D4
GSM849858	SRR390300	ago2		cell line: NIH-3T3cell type: fibroblastinfected with: murine cytomegalovirus (MCMV)ip antibody: mAgo2-antibodyip antibody vendor: Wakoip antibody cat #: 2D4
GSM852140	SRR391845			gender: femalegenotype/variation: wild typetissue: whole embryodevelopmental stage: E11.5replicate #: 1ststrain: SV129
GSM852141	SRR391846			gender: femalegenotype/variation: ADAR2-/-tissue: whole embryodevelopmental stage: E11.5replicate #: 1ststrain: SV129
GSM852142	SRR391847			gender: femalegenotype/variation: ADAR2-/-/ADAR1-/-tissue: whole embryodevelopmental stage: E11.5replicate #: 1ststrain: SV129
GSM852143	SRR391848			gender: femalegenotype/variation: wild typetissue: whole embryodevelopmental stage: E11.5replicate #: 2ndstrain: SV129
GSM852144	SRR391849			gender: femalegenotype/variation: ADAR2-/-tissue: whole embryodevelopmental stage: E11.5replicate #: 2ndstrain: SV129
GSM852145	SRR391850			gender: femalegenotype/variation: ADAR2-/-/ADAR1-/-tissue: whole embryodevelopmental stage: E11.5replicate #: 2ndstrain: SV129
GSM852146	SRR391851			gender: femalegenotype/variation: wild typetissue: whole embryodevelopmental stage: E11.5replicate #: 3rdstrain: SV129
GSM852147	SRR391852			gender: femalegenotype/variation: ADAR2-/-tissue: whole embryodevelopmental stage: E11.5replicate #: 3rdstrain: SV129
GSM852148	SRR391853			gender: femalegenotype/variation: ADAR2-/-/ADAR1-/-tissue: whole embryodevelopmental stage: E11.5replicate #: 3rdstrain: SV129
GSM855969	SRR394083			background strain: C57BL6/SV129cell type: KRasG12D,p53 -/- murine sarcoma cellsgenotype: Dicer f/-
GSM855970	SRR394084		dicer	background strain: C57BL6/SV129cell type: KRasG12D,p53 -/- murine sarcoma cellsgenotype: Dicer -/-
Rui	RuiDcrKO		dicer	DGCR8-dependent microRNA biogenesis is essential for skin development
Rui	RuiDcrWT			DGCR8-dependent microRNA biogenesis is essential for skin development
Rui	RuiDGCR8KO		dgcr8	DGCR8-dependent microRNA biogenesis is essential for skin development
Rui	RuiDGCR8WT			DGCR8-dependent microRNA biogenesis is essential for skin development
Rui	Ago1IP517	ago1		Quantitative functions of Argonaute proteins in mammalian development
Rui	Ago1IP812	ago1		Quantitative functions of Argonaute proteins in mammalian development
Rui	Ago2IP504	ago2		Quantitative functions of Argonaute proteins in mammalian development
Rui	Ago2IP517	ago2		Quantitative functions of Argonaute proteins in mammalian development
Rui	Ago3IP805	ago3		Quantitative functions of Argonaute proteins in mammalian development
Rui	Ago3IP812	ago3		Quantitative functions of Argonaute proteins in mammalian development
SRA056111/SRX170313	SRR525237			Mus musculus domesticus miRNA sequencing
SRA056111/SRX170314	SRR525238			Mus musculus domesticus miRNA sequencing
SRA056111/SRX170315	SRR525239	ago1		Mus musculus domesticus miRNA sequencing
SRA056111/SRX170316	SRR525240	ago1		Mus musculus domesticus miRNA sequencing
SRA056111/SRX170317	SRR525241	ago1		Mus musculus domesticus miRNA sequencing
SRA056111/SRX170318	SRR525242	ago2		Mus musculus domesticus miRNA sequencing
SRA056111/SRX170319	SRR525243	ago2		Mus musculus domesticus miRNA sequencing
SRA056111/SRX170320	SRR525244	ago2		Mus musculus domesticus miRNA sequencing
SRX039174	SRR095853			Bar-coding bias in high-throughput multiplex sequencing of miRNA
SRX039178	SRR095855BC1			Bar-coding bias in high-throughput multiplex sequencing of miRNA
SRX039178	SRR095855BC10			Bar-coding bias in high-throughput multiplex sequencing of miRNA
SRX039178	SRR095855BC2			Bar-coding bias in high-throughput multiplex sequencing of miRNA
SRX039178	SRR095855BC3			Bar-coding bias in high-throughput multiplex sequencing of miRNA
SRX039178	SRR095855BC4			Bar-coding bias in high-throughput multiplex sequencing of miRNA
SRX039178	SRR095855BC5			Bar-coding bias in high-throughput multiplex sequencing of miRNA
SRX039178	SRR095855BC6			Bar-coding bias in high-throughput multiplex sequencing of miRNA
SRX039178	SRR095855BC7			Bar-coding bias in high-throughput multiplex sequencing of miRNA
SRX039178	SRR095855BC8			Bar-coding bias in high-throughput multiplex sequencing of miRNA
SRX039178	SRR095855BC9			Bar-coding bias in high-throughput multiplex sequencing of miRNA
SRX097257	SRR345196			GSE32055: Neuronal activity regulates hippocampal miRNA expression
SRX097258	SRR345197			GSE32055: Neuronal activity regulates hippocampal miRNA expression
SRX097259	SRR345198			GSE32055: Neuronal activity regulates hippocampal miRNA expression
SRX097260	SRR345199			GSE32055: Neuronal activity regulates hippocampal miRNA expression
SRX097261	SRR345200			GSE32055: Neuronal activity regulates hippocampal miRNA expression
SRX097262	SRR345201			GSE32055: Neuronal activity regulates hippocampal miRNA expression
SRX097263	SRR345202			GSE32055: Neuronal activity regulates hippocampal miRNA expression
SRX097264	SRR345203			GSE32055: Neuronal activity regulates hippocampal miRNA expression
SRX097265	SRR345204			GSE32055: Neuronal activity regulates hippocampal miRNA expression
SRX097266	SRR345205			GSE32055: Neuronal activity regulates hippocampal miRNA expression
SRX097267	SRR345206			GSE32055: Neuronal activity regulates hippocampal miRNA expression
SRX097268	SRR345207			GSE32055: Neuronal activity regulates hippocampal miRNA expression
SRX098254	SRR346413			Global profiling of miRNA and the hairpin precursor
SRX098255	SRR346414			Global profiling of miRNA and the hairpin precursor
SRX098256	SRR346415			Global profiling of miRNA and the hairpin precursor
SRX098257	SRR346416			Global profiling of miRNA and the hairpin precursor
SRX098258	SRR346417			Global profiling of miRNA and the hairpin precursor
SRX098259	SRR346418			Global profiling of miRNA and the hairpin precursor
SRX098260	SRR346419			Global profiling of miRNA and the hairpin precursor
SRX098261	SRR346420			Global profiling of miRNA and the hairpin precursor
SRX098263	SRR346421			Global profiling of miRNA and the hairpin precursor
SRX098264	SRR346422			Global profiling of miRNA and the hairpin precursor
SRX098265	SRR346423			Global profiling of miRNA and the hairpin precursor
SRX098266	SRR346424			Global profiling of miRNA and the hairpin precursor
SRX098267	SRR346425			Global profiling of miRNA and the hairpin precursor
SRX117943	SRR402760			GSE35368: Deep-sequencing influences the results obtained in small-RNA sequencing
SRX117944	SRR402761			GSE35368: Deep-sequencing influences the results obtained in small-RNA sequencing
SRX117945	SRR402762			GSE35368: Deep-sequencing influences the results obtained in small-RNA sequencing
SRX117949	SRR402766			GSE35368: Deep-sequencing influences the results obtained in small-RNA sequencing
SRX180174	SRR546155	ago2		Global profiling of miRNA and the hairpin precursor
SRX180174	SRR546156	ago2		Global profiling of miRNA and the hairpin precursor
SRX180174	SRR546157	ago2		Global profiling of miRNA and the hairpin precursor
SRX182788	SRR553582			GSE40499: Evolution of mammalian miRNA genes
SRX182789	SRR553583			GSE40499: Evolution of mammalian miRNA genes
SRX182790	SRR553584			GSE40499: Evolution of mammalian miRNA genes
SRX182791	SRR553585			GSE40499: Evolution of mammalian miRNA genes
SRX182792	SRR553586			GSE40499: Evolution of mammalian miRNA genes
SRX182808	SRR553602			GSE40499: Evolution of mammalian miRNA genes
SRX182809	SRR553603			GSE40499: Evolution of mammalian miRNA genes
SRX182810	SRR553604			GSE40499: Evolution of mammalian miRNA genes
